# Supplementary material for: DFT Study on the Biosynthesis of Verrucosane Diterpenoids and Mangicol Sesterterpenoids: Involvement of Secondary-Carbocation-Free Reaction Cascades
Source: PubMed Central journal article supplement — JACS Au. 2021 Jul 9;1(8):1231–9. doi: 10.1021/jacsau.1c00178 (PMC8397367; doi:10.1021/jacsau.1c00178), 2021-07-09
Supplement: au1c00178_si_001.pdf [file au1c00178_si_001.pdf]

## SUPPORTING INFORMATION

### DFT Study on the Biosynthesis of Verrucosane Diterpenoids and Mangicol Sesterterpenoids: Involvement of Secondary-carbocation-free Reaction Cascades

Hajime Sato,<sup>\*,†,‡</sup> Bi-Xiao Li,<sup>‡</sup> Taisei Takagi,<sup>‡</sup> Chao Wang,<sup>‡</sup> Kazunori Miyamoto,<sup>‡</sup>  
Masanobu Uchiyama<sup>\*,‡,§</sup>

<sup>†</sup>Interdisciplinary Graduate School of Medicine and Engineering, University of Yamanashi, 4-4-37  
Takeda, Kofu, Yamanashi 400-8510, Japan.

<sup>‡</sup>Graduate School of Pharmaceutical Sciences, The University of Tokyo, 7-3-1 Hongo, Bunkyo-ku,  
Tokyo 113-0033, Japan

<sup>§</sup>Research Initiative for Supra-Materials (RISM), Shinshu University, 3-15-1 Tokida, Ueda, Nagano 386-  
8567, Japan

Email: hsato@yamanashi.ac.jp

Email: uchiyama@mol.f.u-tokyo.ac.jp

### Table of Contents

1. Computational Details  
S-1
2. Cartesian Coordinates and Energies of Computed  
Structures S-1
3. 3D Representation of All Computed Structures

S-21

**4.** Reference

S-29

## 1. Computational Details

All calculations were carried with GRRM11<sup>1-5</sup> based on Gaussian16 program.<sup>6</sup> Structure optimizations were carried out at the M06-2X level in the gas phase using the 6-31+G(d,p) basis set.<sup>7</sup> The vibrational frequencies were computed at the same level to check whether each optimized structure is an energy minimum (no imaginary frequency) or a transition state (single imaginary frequency). Intrinsic reaction coordinates (IRC) calculations<sup>8-11</sup> were performed to track minimum energy paths from transition structures to the corresponding local minima. Single-point energies were calculated at the mPW1PW91/6-31+G(d,p) level<sup>12,13</sup> based on the structures optimized by the M06-2X method. The Gibbs free energy used for discussion in this study was calculated by adding the gas-phase Gibbs free energy correction.

## 2. Cartesian Coordinates and Energies of Computed Structures

|                                    |             |             |             |                                    |             |             |             |
|------------------------------------|-------------|-------------|-------------|------------------------------------|-------------|-------------|-------------|
| <b>IM0</b>                         |             |             |             | C                                  | 2.43186700  | 1.58506100  | 0.49968000  |
| Sum of electronic and thermal Free |             |             |             | H                                  | 2.10902400  | 0.90861600  | 1.29475900  |
| Energies = -781.118377             |             |             |             | C                                  | 3.70542000  | 1.18680000  | -0.19367000 |
| -----                              |             |             |             | H                                  | 4.09164300  | 2.00558000  | -0.80522400 |
| C                                  | -2.63625200 | 1.32079100  | 0.37637700  | H                                  | 4.46810100  | 1.00050600  | 0.57317500  |
| C                                  | -3.73744500 | 0.37802500  | 0.53316000  | C                                  | 1.69331700  | 2.68553700  | 0.29573100  |
| C                                  | -4.79029700 | 0.23251100  | -0.43479400 | C                                  | 1.97954300  | 3.73620500  | -0.74519500 |
| C                                  | -1.48080600 | 0.56957100  | -0.45667100 | H                                  | 2.80373000  | 3.47201000  | -1.40737100 |
| C                                  | -4.95759400 | 1.05727500  | -1.49148500 | H                                  | 1.09213700  | 3.90744200  | -1.36652200 |
| C                                  | -0.74124400 | -0.46843300 | 0.30381800  | H                                  | 2.21744100  | 4.69393900  | -0.26799300 |
| C                                  | -0.79806600 | -1.80075800 | 0.09392700  | C                                  | 0.51106800  | 3.00303700  | 1.17879800  |
| H                                  | -2.90558600 | 2.21508800  | -0.18554800 | H                                  | 0.27854900  | 2.17992500  | 1.86277500  |
| H                                  | -4.30956900 | 1.90708800  | -1.68372100 | H                                  | 0.71721200  | 3.89170900  | 1.78684100  |
| H                                  | -1.91107900 | 0.19745400  | -1.38937700 | H                                  | -0.38092500 | 3.24434100  | 0.58401800  |
| H                                  | -0.02628000 | -0.09541900 | 1.03564000  | C                                  | -1.70700700 | -2.44082000 | -0.92244400 |
| H                                  | -2.20478700 | 1.60420200  | 1.33852700  | H                                  | -2.00492900 | -3.44148600 | -0.59734300 |
| H                                  | -5.48802400 | -0.58607700 | -0.28116800 | H                                  | -2.61370400 | -1.85864000 | -1.11561500 |
| H                                  | -0.78662800 | 1.38123200  | -0.70221800 | H                                  | -1.18589700 | -2.55740000 | -1.88099000 |
| H                                  | -5.77109500 | 0.89706900  | -2.19210700 | C                                  | 0.18716400  | -2.71106300 | 0.77420200  |
| C                                  | -3.65817700 | -0.57475100 | 1.63851500  | H                                  | 0.65200200  | -2.19061900 | 1.61824600  |
| H                                  | -4.51660700 | -1.23906200 | 1.72436900  | H                                  | -0.31989000 | -3.60408000 | 1.15862200  |
| H                                  | -2.73399100 | -1.16777100 | 1.42800800  |                                    |             |             |             |
| H                                  | -3.43522900 | -0.07866400 | 2.58824100  |                                    |             |             |             |
| C                                  | 1.30480000  | -3.13890100 | -0.21396600 | <b>TS_0-1</b>                      |             |             |             |
| H                                  | 0.87310800  | -3.76901300 | -0.99978200 | Sum of electronic and thermal Free |             |             |             |
| H                                  | 2.01353100  | -3.76889900 | 0.32973300  | Energies = -781.110522             |             |             |             |
| C                                  | 1.97959800  | -1.94330500 | -0.83079400 | -----                              |             |             |             |
| H                                  | 1.51256800  | -1.54918500 | -1.73429100 | C                                  | 2.80909100  | 0.66269200  | 0.18990900  |
| C                                  | 3.04588700  | -1.28419500 | -0.35815500 | C                                  | 3.97837500  | -0.17289400 | -0.16809300 |
| C                                  | 3.80360100  | -1.68334800 | 0.88139400  | C                                  | 5.26395100  | 0.38780000  | -0.46362900 |
| H                                  | 4.88011300  | -1.70911600 | 0.67866500  | C                                  | 1.62036600  | -0.01530300 | 0.89477100  |
| H                                  | 3.65349700  | -0.95268900 | 1.68551600  | C                                  | 5.55524700  | 1.70483200  | -0.35033800 |
| H                                  | 3.50789500  | -2.66125200 | 1.26422300  | C                                  | 0.77459000  | -0.86444200 | -0.01530400 |
| C                                  | 3.57152000  | -0.06626600 | -1.08199500 | C                                  | 0.34400900  | -2.11684400 | 0.19006300  |
| H                                  | 4.56476700  | -0.29752000 | -1.49000400 | H                                  | 3.13613800  | 1.55135100  | 0.73793000  |
| H                                  | 2.91751000  | 0.16285300  | -1.93068700 |                                    |             |             |             |



|   |             |             |             |
|---|-------------|-------------|-------------|
| C | -0.94641600 | 3.26246600  | -1.03333300 |
| H | -0.59347200 | 2.65985400  | -1.87623200 |
| H | -1.34206400 | 4.20105200  | -1.43795400 |
| H | -0.09079200 | 3.53904300  | -0.40456700 |
| C | 2.18133200  | -2.01333800 | 1.24910800  |
| H | 2.79282600  | -2.89352100 | 1.03305700  |
| H | 2.83463500  | -1.21644500 | 1.60285300  |
| H | 1.48573000  | -2.27449800 | 2.05228000  |
| C | 0.62439800  | -2.75741300 | -0.63916800 |
| H | 0.18134500  | -2.40683200 | -1.57997000 |
| H | 1.30965300  | -3.57817800 | -0.87620200 |

**IM2**

Sum of electronic and thermal Free  
Energies = -781.158944

|   |             |             |             |
|---|-------------|-------------|-------------|
| C | -0.56688800 | 1.94362200  | -0.04962900 |
| C | -2.01346000 | 2.37533800  | 0.10907500  |
| C | -2.96656100 | 1.60060200  | 0.64186200  |
| C | -0.31266800 | 0.65612300  | -0.85824600 |
| C | -2.80317300 | 0.18570200  | 1.14383100  |
| C | -0.71754300 | -0.57760200 | -0.07075200 |
| C | -2.24015800 | -0.82406900 | 0.11999100  |
| H | -0.01770500 | 2.75470900  | -0.53988900 |
| H | -2.16465700 | 0.16574400  | 2.04016700  |
| H | -0.84031300 | 0.69036100  | -1.81778900 |
| H | -0.28555600 | -0.49689800 | 0.93829000  |
| H | -0.10460700 | 1.82241400  | 0.94219700  |
| H | -3.96764600 | 2.01974500  | 0.71760200  |
| H | 0.75885300  | 0.62569800  | -1.07593400 |
| H | -3.78254200 | -0.18763800 | 1.46280400  |
| C | -2.31478100 | 3.77574500  | -0.35536200 |
| H | -3.36254500 | 4.03818600  | -0.19795500 |
| H | -1.69366700 | 4.50205500  | 0.18152700  |
| H | -2.08619800 | 3.88829800  | -1.42181000 |
| C | -1.32707500 | -3.03243100 | -0.27514100 |
| H | -1.85518400 | -3.37985100 | -1.16555100 |
| H | -0.89357600 | -3.92041600 | 0.19170900  |
| C | -0.24785000 | -2.02002300 | -0.72457300 |
| H | -0.19676900 | -1.86070400 | -1.80561300 |
| C | 1.05648300  | -2.10087300 | -0.13308200 |
| C | 1.25398000  | -2.65430900 | 1.22379400  |
| H | 1.90111500  | -3.53875800 | 1.12597800  |
| H | 1.81293500  | -1.94630800 | 1.84308700  |
| H | 0.32805500  | -2.94083400 | 1.71818600  |
| C | 2.23994600  | -1.63909100 | -0.88853300 |
| H | 2.53092800  | -2.56739400 | -1.42280000 |
| H | 1.92784300  | -0.95654000 | -1.68611400 |
| C | 3.11836500  | 0.14284800  | 0.71864800  |
| H | 2.96453600  | 0.00215000  | 1.78816000  |
| C | 3.43718400  | -1.09448100 | -0.09283100 |
| H | 4.23340100  | -0.88811500 | -0.81340700 |
| H | 3.83006800  | -1.87648900 | 0.56426600  |
| C | 3.08154600  | 1.40008900  | 0.25201200  |
| C | 3.31351400  | 1.76965300  | -1.18841300 |
| H | 3.51250100  | 0.91263700  | -1.83543100 |
| H | 2.44350400  | 2.30574400  | -1.58771400 |
| H | 4.16233000  | 2.45737500  | -1.26881300 |
| C | 2.84616100  | 2.56752900  | 1.17226400  |
| H | 2.60497300  | 2.24662700  | 2.18810400  |
| H | 3.74340900  | 3.19497900  | 1.21522700  |
| H | 2.03497500  | 3.20387800  | 0.80283500  |
| C | -3.01093000 | -0.74024200 | -1.20359800 |
| H | -4.04488400 | -1.05900500 | -1.03679300 |
| H | -3.04089600 | 0.27957700  | -1.58960200 |
| H | -2.58822100 | -1.38529000 | -1.98044600 |
| C | -2.27233200 | -2.25962000 | 0.65438800  |
| H | -1.90476700 | -2.27456000 | 1.68932500  |
| H | -3.28224200 | -2.67843500 | 0.66197500  |

**TS\_2-3**

Sum of electronic and thermal Free  
Energies = -781.157424

|   |             |             |             |
|---|-------------|-------------|-------------|
| C | 1.50434700  | 1.80043100  | -0.79279000 |
| C | 2.94742000  | 1.84099100  | -0.32451300 |
| C | 3.72147300  | 0.75066800  | -0.26391600 |
| C | 0.56116900  | 0.91856100  | 0.04513300  |
| C | 3.29183900  | -0.65459600 | -0.61388700 |
| C | 0.78505700  | -0.56824200 | -0.21030200 |
| C | 2.12470100  | -1.19814000 | 0.23514400  |
| H | 1.10677700  | 2.82044800  | -0.79532300 |
| H | 3.00756600  | -0.71504200 | -1.67588900 |
| H | 0.67677800  | 1.14693700  | 1.11245800  |
| H | 0.72583800  | -0.72760800 | -1.29705000 |
| H | 1.46640600  | 1.45719500  | -1.83757100 |
| H | 4.74601700  | 0.87324600  | 0.08114000  |
| H | -0.47501800 | 1.16653600  | -0.22227000 |
| H | 4.14525500  | -1.32947600 | -0.48781400 |
| C | 3.46631500  | 3.19998600  | 0.06123700  |
| H | 4.50852100  | 3.15925200  | 0.38357700  |
| H | 3.39310700  | 3.89471800  | -0.78323200 |
| H | 2.86845700  | 3.62623900  | 0.87587000  |
| C | 0.41277100  | -2.93029300 | 0.46930900  |
| H | 0.39889800  | -3.28076800 | 1.50297100  |
| H | -0.12482100 | -3.67403200 | -0.12584900 |
| C | -0.28756600 | -1.49343500 | 0.46012200  |
| H | -0.47533300 | -1.16187300 | 1.48426400  |
| C | -1.53849300 | -1.61086200 | -0.26189400 |
| C | -1.54418500 | -1.88627300 | -1.70753000 |
| H | -2.41781100 | -2.46404500 | -2.01758300 |
| H | -1.64334500 | -0.89244500 | -2.18025900 |
| H | -0.61704200 | -2.33184400 | -2.06903500 |
| C | -2.83019300 | -1.48081400 | 0.43816700  |
| H | -3.18864200 | -2.52307400 | 0.54407400  |
| H | -2.67039500 | -1.09224000 | 1.44597500  |
| C | -3.40130400 | 0.72747600  | -0.69481200 |
| H | -3.24987200 | 0.91839100  | -1.75648400 |
| C | -3.89931700 | -0.65173500 | -0.31999000 |
| H | -4.77311400 | -0.59781600 | 0.33679000  |
| H | -4.22567300 | -1.18797700 | -1.21467000 |
| C | -3.15160000 | 1.72693400  | 0.16376700  |
| C | -3.35620900 | 1.62323900  | 1.65196800  |
| H | -3.95796600 | 0.76095000  | 1.94743100  |
| H | -2.38826800 | 1.56512700  | 2.16718400  |
| H | -3.85363100 | 2.52256900  | 2.02751200  |
| C | -2.63021000 | 3.05487200  | -0.31343100 |
| H | -2.43124700 | 3.05630300  | -1.38757300 |
| H | -3.35232500 | 3.84860200  | -0.09447300 |
| H | -1.70538100 | 3.31694500  | 0.21520900  |
| C | 2.41092000  | -1.00247900 | 1.72984900  |
| H | 3.35744100  | -1.49007100 | 1.98455200  |
| H | 2.50795100  | 0.05375300  | 1.98769200  |
| H | 1.63708000  | -1.44131100 | 2.36847600  |
| C | 1.83960100  | -2.67742600 | -0.05349900 |
| H | 1.88781800  | -2.85958700 | -1.13447500 |
| H | 2.55675300  | -3.35119400 | 0.42554100  |

**IM3**

Sum of electronic and thermal Free  
Energies = -781.16177

|   |             |             |             |
|---|-------------|-------------|-------------|
| C | 2.13784600  | 1.43391800  | -1.21866600 |
| C | 3.44239300  | 1.30136500  | -0.45293400 |
| C | 3.89178700  | 0.14018100  | 0.03912300  |
| C | 0.86862700  | 1.01962200  | -0.45481100 |
| C | 3.18758000  | -1.19428100 | -0.04860000 |
| C | 0.74875300  | -0.49613400 | -0.31399100 |
| C | 1.78399500  | -1.21736200 | -0.58262900 |
| H | 2.02379600  | 2.47517300  | -1.53510300 |
| H | 3.10155100  | -1.51245900 | -1.09940700 |
| H | 0.84158100  | 1.50010500  | 0.53148500  |
| H | 0.87442200  | -0.92130700 | -1.32057800 |
| H | 2.19676000  | 0.84107800  | -2.14383000 |
| H | 4.84445800  | 0.14865700  | 0.56454500  |
| H | -0.00743000 | 1.38856600  | -1.00379900 |
| H | 3.80201100  | -1.95192800 | 0.45005600  |
| C | 4.22758700  | 2.57600100  | -0.29485700 |

|   |             |             |             |
|---|-------------|-------------|-------------|
| H | 5.15734000  | 2.41489700  | 0.25411700  |
| H | 4.47424500  | 2.99995800  | -1.27494500 |
| H | 3.63698000  | 3.33114400  | 0.23753400  |
| C | -0.32336800 | -2.46432900 | 0.83972400  |
| H | -0.61837500 | -2.41354500 | 1.88874000  |
| H | -0.90097500 | -3.28026000 | 0.38949600  |
| C | -0.60360900 | -0.95212300 | 0.23636200  |
| H | -0.97629100 | -0.32961800 | 1.05289300  |
| C | -1.66016700 | -1.44780900 | -0.58633600 |
| C | -1.41916200 | -1.94914500 | -1.96057100 |
| H | -2.23580200 | -2.57237000 | -2.32588000 |
| H | -1.34626500 | -1.05589900 | -2.60137100 |
| H | -0.46394400 | -2.47010300 | -2.05530400 |
| C | -3.04788000 | -1.41880800 | -0.08314600 |
| H | -3.57119300 | -2.35154100 | -0.31447300 |
| H | -3.06592900 | -1.23173100 | 0.99372700  |
| C | -3.05204100 | 1.08113400  | -0.72705600 |
| H | -2.51992700 | 1.40051100  | -1.62337900 |
| C | -3.78023600 | -0.23691700 | -0.81913400 |
| H | -4.77497100 | -0.18446700 | -0.36762400 |
| H | -3.92598500 | -0.51462800 | -1.86666300 |
| C | -3.00965600 | 1.88219500  | 0.34710500  |
| C | -3.70936400 | 1.58001400  | 1.64548300  |
| H | -4.35598900 | 0.70140700  | 1.59875500  |
| H | -2.97643800 | 1.42666900  | 2.44746100  |
| H | -4.32417000 | 2.43330900  | 1.94925300  |
| C | -2.24227800 | 3.17597900  | 0.32498400  |
| H | -1.74993500 | 3.34362000  | -0.63556700 |
| H | -2.91279200 | 4.01979300  | 0.51925900  |
| H | -1.48240100 | 3.18839300  | 1.11522000  |
| C | 1.82706000  | -0.65742300 | 2.01114500  |
| H | 2.51696000  | -1.25392100 | 2.61703600  |
| H | 2.18517700  | 0.37327400  | 2.02637000  |
| H | 0.84992700  | -0.68312200 | 2.50605500  |
| C | 1.18633200  | -2.63278700 | 0.60124000  |
| H | 1.36469800  | -3.12756200 | -0.36165000 |
| H | 1.61371400  | -3.27182500 | 1.38141500  |

#### TS\_3-4

Sum of electronic and thermal Free  
Energies = -781.151727

|   |             |             |             |
|---|-------------|-------------|-------------|
| C | 2.37052900  | 1.48746100  | -1.08383700 |
| C | 3.62855500  | 1.09256600  | -0.33203300 |
| C | 3.88074000  | -0.16442600 | 0.05095100  |
| C | 1.04696800  | 1.20891700  | -0.35412300 |
| C | 2.97649700  | -1.35245600 | -0.17961300 |
| C | 0.67001900  | -0.28046500 | -0.38057200 |
| C | 1.57932000  | -1.24957200 | 0.46341500  |
| H | 2.41445300  | 2.55781900  | -1.30560300 |
| H | 2.85133300  | -1.53528900 | -1.25785100 |
| H | 1.09118400  | 1.57622800  | 0.67819900  |
| H | 0.73413300  | -0.62221300 | -1.42100700 |
| H | 2.34920300  | 0.97822500  | -2.05856200 |
| H | 4.81115700  | -0.36042500 | 0.57926800  |
| H | 0.24902400  | 1.76834100  | -0.85609000 |
| H | 3.45998200  | -2.24856600 | 0.22592300  |
| C | 4.59565100  | 2.21139100  | -0.05517500 |
| H | 5.48150700  | 1.85998700  | 0.47711100  |
| H | 4.91832100  | 2.67984900  | -0.99184900 |
| H | 4.11886000  | 2.99628300  | 0.54385100  |
| C | -0.64156100 | -2.43800700 | 0.68855800  |
| H | -0.84421300 | -2.20372500 | 1.73489100  |
| H | -1.22314200 | -3.33174200 | 0.43891700  |
| C | -0.70302100 | -0.51405900 | 0.12125400  |
| H | -0.99189300 | 0.00257500  | 1.03838900  |
| C | -1.62181800 | -1.44928700 | -0.38086900 |
| C | -1.52537200 | -1.97911900 | -1.79673500 |
| H | -2.16482400 | -2.85831300 | -1.90862400 |
| H | -1.88715200 | -1.20744400 | -2.48337400 |
| H | -0.51261600 | -2.24576400 | -2.09649900 |
| C | -3.02705300 | -1.35684000 | 0.17568700  |
| H | -3.53436900 | -2.32368800 | 0.09430400  |
| H | -2.97992100 | -1.09234800 | 1.23855300  |
| C | -3.07710700 | 1.03065500  | -0.74884800 |

|   |             |             |             |
|---|-------------|-------------|-------------|
| H | -2.66873100 | 1.23922000  | -1.73851200 |
| C | -3.82658900 | -0.27118700 | -0.58897500 |
| H | -4.76825000 | -0.11767300 | -0.05303100 |
| H | -4.09952500 | -0.65569500 | -1.57590700 |
| C | -2.89497200 | 1.95953000  | 0.20556400  |
| C | -3.42369600 | 1.82604400  | 1.60894500  |
| H | -4.05852600 | 0.94974800  | 1.75174900  |
| H | -2.59625000 | 1.77567600  | 2.32897800  |
| H | -4.00692700 | 2.71289300  | 1.87768500  |
| C | -2.15811700 | 3.24164900  | -0.07390500 |
| H | -1.78279200 | 3.28355800  | -1.09913100 |
| H | -2.82203700 | 4.09895200  | 0.08147800  |
| H | -1.31592200 | 3.36937000  | 0.61693800  |
| C | 1.69971700  | -0.82723300 | 1.93290100  |
| H | 2.31509500  | -1.55875400 | 2.46673000  |
| H | 2.19124900  | 0.14157900  | 2.03095200  |
| H | 0.73537700  | -0.77138100 | 2.44835100  |
| C | 0.83747100  | -2.59489100 | 0.35798800  |
| H | 0.95779300  | -3.01616600 | -0.64652100 |
| H | 1.26146000  | -3.32514200 | 1.05683300  |

#### TM4

Sum of electronic and thermal Free  
Energies = -781.177659

|   |             |             |             |
|---|-------------|-------------|-------------|
| C | 2.36411700  | 1.36596200  | -1.02699100 |
| C | 3.54891200  | 0.77831300  | -0.28902000 |
| C | 3.60807300  | -0.52629100 | -0.00449300 |
| C | 1.02376100  | 1.20017300  | -0.29138600 |
| C | 2.55006100  | -1.53368000 | -0.38009400 |
| C | 0.38136600  | -0.18910700 | -0.41050800 |
| C | 1.16306200  | -1.35267600 | 0.29107900  |
| H | 2.54296700  | 2.43253300  | -1.19686100 |
| H | 2.40478600  | -1.54007100 | -1.47121000 |
| H | 1.15006500  | 1.48120400  | 0.76357900  |
| H | 0.36107800  | -0.42878000 | -1.48534200 |
| H | 2.27596600  | 0.90582000  | -2.02189000 |
| H | 4.47443900  | -0.89816100 | 0.53909200  |
| H | 0.32429000  | 1.93030500  | -0.73276200 |
| H | 2.91302100  | -2.53357800 | -0.11875200 |
| C | 4.63259400  | 1.74239200  | 0.10756300  |
| H | 5.44349100  | 1.24088100  | 0.63952400  |
| H | 5.05308600  | 2.23593800  | -0.77615300 |
| H | 4.23376800  | 2.53445400  | 0.75337200  |
| C | -1.08473600 | -2.64827700 | 0.51486200  |
| H | -1.15904700 | -2.50944500 | 1.60131300  |
| H | -1.55652500 | -3.61130200 | 0.28976800  |
| C | -1.05993500 | -0.20663500 | 0.09656300  |
| H | -1.03621400 | -0.10210600 | 1.18997400  |
| C | -1.83130600 | -1.51254600 | -0.19106500 |
| C | -1.98095400 | -1.81965300 | -1.69087000 |
| H | -2.53639000 | -2.75513400 | -1.80803000 |
| H | -2.53815500 | -1.04611200 | -2.22921300 |
| H | -1.02209500 | -1.94406300 | -2.19709800 |
| C | -3.20391600 | -1.15243800 | 0.38599200  |
| H | -4.00470200 | -1.82219400 | 0.05754700  |
| H | -3.17101400 | -1.18506300 | 1.48118000  |
| C | -2.01840800 | 0.89259400  | -0.44004800 |
| H | -1.91620400 | 1.00727000  | -1.52232700 |
| C | -3.47349600 | 0.29127600  | -0.09801200 |
| H | -4.01791600 | 0.87942700  | 0.64688300  |
| H | -4.05285300 | 0.33257600  | -1.02235500 |
| C | -1.97837300 | 2.18398200  | 0.20772500  |
| C | -1.87964900 | 2.31135800  | 1.67226100  |
| H | -2.17993500 | 1.41408900  | 2.21374800  |
| H | -0.80634300 | 2.47497000  | 1.87307300  |
| H | -2.40138900 | 3.19876200  | 2.03919800  |
| C | -2.13170100 | 3.41989700  | -0.57764100 |
| H | -1.78077500 | 3.31984800  | -1.60521300 |
| H | -3.22286500 | 3.59414000  | -0.61776600 |
| H | -1.70083000 | 4.29147100  | -0.07956600 |
| C | 1.36022000  | -1.11023400 | 1.79581300  |
| H | 1.96314600  | -1.92387200 | 2.21324300  |
| H | 1.89853000  | -0.18101600 | 1.99547400  |
| H | 0.41978300  | -1.09260000 | 2.35469200  |

|   |            |             |             |
|---|------------|-------------|-------------|
| C | 0.38971100 | -2.67881700 | 0.08719900  |
| H | 0.45988900 | -2.96943300 | -0.96893900 |
| H | 0.90852200 | -3.46432100 | 0.64823500  |

|   |             |             |             |
|---|-------------|-------------|-------------|
| H | 2.58479600  | -1.46144700 | -1.49660000 |
| H | 0.98458000  | 1.72779100  | 0.43789000  |
| H | 0.51488400  | -0.59218200 | -1.46072600 |
| H | 2.01132700  | 0.84100700  | -2.36205600 |
| H | 4.18242500  | -0.16004400 | 0.72099600  |
| H | -0.81056600 | 2.60487100  | -0.38649200 |
| H | 3.38128500  | -2.22289300 | -0.09945900 |
| C | 3.64502000  | 2.37381700  | 0.27412500  |
| H | 4.18032300  | 2.10216300  | 1.18565900  |
| H | 4.34571300  | 2.85367800  | -0.41508100 |
| H | 2.88201500  | 3.11408000  | 0.53194400  |
| C | -0.79386700 | -2.77736700 | 0.52589900  |
| H | -0.86546900 | -2.66979300 | 1.61495100  |
| H | -1.23977400 | -3.74814700 | 0.28364300  |
| C | -0.88595200 | -0.56029000 | 0.13157100  |
| H | -0.84025300 | -0.18483100 | 1.22574900  |
| C | -1.57445100 | -1.64843400 | -0.15232000 |
| C | -1.74224800 | -1.95742900 | -1.65211100 |
| H | -2.24736100 | -2.92280100 | -2.17551400 |
| H | -2.36186400 | -1.21437000 | -2.16014700 |
| H | -0.79838300 | -2.03159500 | -2.19984700 |
| C | -2.96347600 | -1.35347700 | 0.43537000  |
| H | -3.72220400 | -2.05886700 | 0.08444400  |
| H | -2.92251000 | -1.43314600 | 1.52832000  |
| C | -1.89742300 | 0.75181200  | -0.38606200 |
| H | -1.82916600 | 0.77572600  | -1.48304000 |
| C | -3.26177800 | 0.10760100  | 0.01258500  |
| H | -3.73064200 | 0.65421500  | 0.83518000  |
| H | -3.96385400 | 0.15021700  | -0.82428300 |
| C | -1.72524000 | 2.21008000  | 0.08433300  |
| C | -1.58325400 | 2.36198000  | 1.60132800  |
| H | -0.67881600 | 1.88600000  | 1.99874800  |
| H | -1.54586200 | 3.41964900  | 1.87702400  |
| H | -2.43665900 | 1.91888900  | 2.12597200  |
| C | -2.87688700 | 3.07630000  | -0.43775100 |
| H | -3.00578800 | 2.95587300  | -1.51813400 |
| H | -3.82171900 | 2.80885500  | 0.04549700  |
| H | -2.69001900 | 4.13422700  | -0.23440000 |
| C | 1.55690200  | -1.18093200 | 1.81838200  |
| H | 2.30332800  | -1.87652100 | 2.21554100  |
| H | 1.89222200  | -0.16365800 | 2.04749500  |
| H | 0.63276400  | -1.35037800 | 2.37154800  |
| C | 0.68426400  | -2.78483000 | 0.08912600  |
| H | 0.75480000  | -3.05539500 | -0.97173600 |
| H | 1.23349600  | -3.55413000 | 0.64417300  |

**TS\_4-5**

Sum of electronic and thermal Free Energies = -781.166925

|   |             |             |             |
|---|-------------|-------------|-------------|
| C | 2.18661600  | 1.32121700  | -0.99384300 |
| C | 3.35726600  | 0.57848200  | -0.32757600 |
| C | 3.38343100  | -0.75761800 | -0.16889300 |
| C | 1.11309000  | 0.90914500  | -0.06415100 |
| C | 2.33204300  | -1.76560400 | -0.56029000 |
| C | 0.31248300  | -0.29501700 | -0.35921100 |
| C | 0.99816900  | -1.60597700 | 0.21470300  |
| H | 2.39058800  | 2.39359900  | -0.98139000 |
| H | 2.11913900  | -1.70823100 | -1.63671700 |
| H | 1.22414600  | 1.21703200  | 0.97830000  |
| H | 0.27671900  | -0.41829000 | -1.44986000 |
| H | 1.99331800  | 0.98688400  | -2.01603500 |
| H | 4.26163600  | -1.15593900 | 0.33629000  |
| H | -0.02007300 | 2.03356400  | -0.20907700 |
| H | 2.72603200  | -2.76913400 | -0.37288700 |
| C | 4.42682100  | 1.47719500  | 0.23059400  |
| H | 5.22115500  | 0.90004800  | 0.70655100  |
| H | 4.86456700  | 2.08978100  | -0.56444300 |
| H | 4.01036400  | 2.16503800  | 0.97620300  |
| C | -1.38922300 | -2.62582300 | 0.43462200  |
| H | -1.38625500 | -2.57087800 | 1.53041700  |
| H | -1.97020000 | -3.51512800 | 0.16894600  |
| C | -1.10054100 | -0.18504000 | 0.18205300  |
| H | -1.04196900 | -0.13577500 | 1.28047500  |
| C | -2.02694100 | -1.35889400 | -0.14693000 |
| C | -2.28930400 | -1.54478800 | -1.65354100 |
| H | -2.84479800 | -2.47583000 | -1.80209400 |
| H | -2.90311200 | -0.74074400 | -2.06774600 |
| H | -1.37820200 | -1.61075300 | -2.25558100 |
| C | -3.31709400 | -0.81768800 | 0.51246700  |
| H | -4.21856400 | -1.27573400 | 0.09727200  |
| H | -3.30642800 | -1.03306500 | 1.58652500  |
| C | -1.86323800 | 1.04061000  | -0.29394900 |
| H | -1.90588400 | 1.01054900  | -1.39015300 |
| C | -3.27940100 | 0.73525100  | 0.27618300  |
| H | -3.44240500 | 1.26423200  | 1.21947300  |
| H | -4.05751300 | 1.06592500  | -0.41538700 |
| C | -1.13260900 | 2.32069200  | 0.06991200  |
| C | -1.11287700 | 2.69584900  | 1.54342600  |
| H | -0.92279900 | 1.84254800  | 2.20088900  |
| H | -0.36127000 | 3.46526200  | 1.74192800  |
| H | -2.08484800 | 3.11690900  | 1.82076700  |
| C | -1.44503900 | 3.50571300  | -0.83197000 |
| H | -1.31632200 | 3.25661700  | -1.88824400 |
| H | -2.49307600 | 3.79095200  | -0.68025000 |
| H | -0.82562400 | 4.37338400  | -0.59184100 |
| C | 1.26592400  | -1.54698700 | 1.72483000  |
| H | 1.73397300  | -2.48700900 | 2.03410200  |
| H | 1.94879700  | -0.74106400 | 2.00498600  |
| H | 0.34957400  | -1.43746700 | 2.30814000  |
| C | 0.05190700  | -2.78958400 | -0.09389100 |
| H | 0.02845500  | -2.95469000 | -1.17832700 |
| H | 0.50198400  | -3.68940100 | 0.34150900  |

**IM5**

Sum of electronic and thermal Free Energies = -781.173762

|   |            |             |             |
|---|------------|-------------|-------------|
| C | 1.99907000 | 1.49705900  | -1.49480300 |
| C | 3.02705500 | 1.16702800  | -0.39125600 |
| C | 3.40365100 | -0.10376800 | -0.04054000 |
| C | 1.23495800 | 1.02979900  | -0.35857000 |
| C | 2.75920300 | -1.38244800 | -0.41714500 |
| C | 0.55723100 | -0.30618200 | -0.40205900 |
| C | 1.37030500 | -1.42896100 | 0.31284800  |
| H | 2.02844400 | 2.55873500  | -1.72495700 |

**TS\_5-6**

Sum of electronic and thermal Free Energies = -781.16124

|   |             |             |             |
|---|-------------|-------------|-------------|
| C | 2.21253700  | 1.29586700  | -1.63354100 |
| C | 2.69551400  | 1.25455900  | -0.05991200 |
| C | 3.46906900  | 0.11418400  | -0.24006000 |
| C | 1.25829800  | 1.11940700  | -0.50705800 |
| C | 2.86691500  | -1.24721400 | -0.33939300 |
| C | 0.57293100  | -0.26083700 | -0.44455500 |
| C | 1.46406000  | -1.28549800 | 0.31096600  |
| H | 2.48436800  | 2.26998000  | -2.03029500 |
| H | 2.82912200  | -1.58817200 | -1.38529200 |
| H | 0.67561900  | 1.99523400  | -0.24060300 |
| H | 0.51060600  | -0.60373300 | -1.48672400 |
| H | 2.36568300  | 0.45768300  | -2.30498900 |
| H | 4.55445400  | 0.21738300  | -0.18211500 |
| H | -1.09801000 | 2.60783700  | -0.61830700 |
| H | 3.56207500  | -1.93841000 | 0.15570400  |
| C | 3.24529000  | 2.54165400  | 0.49394400  |
| H | 3.14400700  | 2.52764500  | 1.58277600  |
| H | 4.30183900  | 2.66957500  | 0.24513500  |
| H | 2.68567400  | 3.40072800  | 0.11796600  |
| C | -0.60127500 | -2.76636800 | 0.61423600  |
| H | -0.66650400 | -2.62298200 | 1.69943400  |
| H | -0.99152700 | -3.77090300 | 0.41626200  |
| C | -0.85482500 | -0.29521400 | 0.10830800  |
| H | -0.80783100 | -0.13754600 | 1.19571600  |
| C | -1.46191200 | -1.71481400 | -0.09321700 |
| C | -1.64201200 | -2.10438100 | -1.57310200 |

|   |             |             |             |
|---|-------------|-------------|-------------|
| H | -2.08475200 | -3.10428200 | -1.62039000 |
| H | -2.32055600 | -1.42740100 | -2.09811400 |
| H | -0.70777700 | -2.14238100 | -2.14090600 |
| C | -2.85363300 | -1.49489900 | 0.51502400  |
| H | -3.57039700 | -2.26114400 | 0.20530600  |
| H | -2.78473200 | -1.53474700 | 1.60878300  |
| C | -1.95735900 | 0.64234800  | -0.42966400 |
| H | -1.92926400 | 0.61234600  | -1.52801000 |
| C | -3.25835300 | -0.07342500 | 0.05392700  |
| H | -3.71937100 | 0.47378500  | 0.88067600  |
| H | -4.00131300 | -0.10194200 | -0.74767800 |
| C | -1.90490000 | 2.13665900  | -0.03963800 |
| C | -1.62898900 | 2.37458200  | 1.44702900  |
| H | -0.63183600 | 2.03334000  | 1.75148700  |
| H | -1.70153300 | 3.43964300  | 1.68529100  |
| H | -2.35743200 | 1.84880800  | 2.07462000  |
| C | -3.18817300 | 2.85391100  | -0.47560600 |
| H | -3.41861000 | 2.64906700  | -1.52617100 |
| H | -4.04709000 | 2.53976800  | 0.12458000  |
| H | -3.08240800 | 3.93597000  | -0.35795300 |
| C | 1.60913300  | -0.95625100 | 1.81060600  |
| H | 2.39240800  | -1.58031800 | 2.25374700  |
| H | 1.86322600  | 0.09098100  | 2.00194600  |
| H | 0.69014000  | -1.16035200 | 2.35945000  |
| C | 0.86605400  | -2.69758000 | 0.15896900  |
| H | 0.94020900  | -3.00846100 | -0.89124700 |
| H | 1.47130900  | -3.40713000 | 0.73635000  |

**IM6**

Sum of electronic and thermal Free  
Energies = -781.165183

|   |             |             |             |
|---|-------------|-------------|-------------|
| C | 2.55691700  | 1.00587000  | -1.57460900 |
| C | 2.53716500  | 1.30970800  | 0.06723400  |
| C | 3.38526800  | 0.24454300  | -0.42524600 |
| C | 1.24859900  | 1.10959600  | -0.51321400 |
| C | 2.90147500  | -1.20112200 | -0.27400900 |
| C | 0.57506600  | -0.26814900 | -0.45938500 |
| C | 1.48481000  | -1.25891300 | 0.33293700  |
| H | 2.95907500  | 1.89558400  | -2.04888400 |
| H | 2.93732700  | -1.70486400 | -1.24713700 |
| H | 0.61964100  | 1.98963900  | -0.60279000 |
| H | 0.50674400  | -0.62963900 | -1.49411000 |
| H | 2.19744700  | 0.25028700  | -2.26523700 |
| H | 4.45609900  | 0.42721600  | -0.38968500 |
| H | -1.14962400 | 2.59951300  | -0.73156600 |
| H | 3.60776100  | -1.72391000 | 0.37893500  |
| C | 3.04547700  | 2.63338100  | 0.53055200  |
| H | 3.01193600  | 2.61127700  | 1.62612500  |
| H | 4.08226000  | 2.79967200  | 0.23130600  |
| H | 2.41086800  | 3.45435800  | 0.19104600  |
| C | -0.56987700 | -2.75267300 | 0.65227000  |
| H | -0.63658100 | -2.58858200 | 1.73450300  |
| H | -0.95147600 | -3.76409000 | 0.047365800 |
| C | -0.85453300 | -0.29294800 | 0.09218000  |
| H | -0.81185000 | -0.11027800 | 1.17427400  |
| C | -1.44425000 | -1.72524100 | -0.07620700 |
| C | -1.62353000 | -2.14722700 | -1.54684000 |
| H | -2.05337600 | -3.15345100 | -1.57157700 |
| H | -2.31263500 | -1.49050700 | -2.08385500 |
| H | -0.69041500 | -2.18734500 | -2.11661700 |
| C | -2.83670500 | -1.50654100 | 0.53193300  |
| H | -3.54802100 | -2.28111700 | 0.23089600  |
| H | -2.76620500 | -1.53573800 | 1.62576600  |
| C | -1.96720800 | 0.62197400  | -0.46207200 |
| H | -1.95343000 | 0.56320300  | -1.55940400 |
| C | -3.25466600 | -0.09246400 | 0.05835200  |
| H | -3.69720800 | 0.46507200  | 0.88837700  |
| H | -4.01532500 | -0.13220800 | -0.72581100 |
| C | -1.92175800 | 2.12666200  | -0.10816300 |
| C | -1.58100400 | 2.40175400  | 1.35818200  |
| H | -0.56322900 | 2.08419900  | 1.62015900  |
| H | -1.66154400 | 3.47020200  | 1.57770300  |
| H | -2.26798000 | 1.87610900  | 2.03114600  |
| C | -3.23164200 | 2.81905900  | -0.50362100 |
| H | -3.50744100 | 2.58304000  | -1.53645500 |

|   |             |             |             |
|---|-------------|-------------|-------------|
| H | -4.05885800 | 2.51443400  | 0.14376200  |
| H | -3.13133200 | 3.90479800  | -0.42095100 |
| C | 1.58982800  | -0.90446900 | 1.83008200  |
| H | 2.27994000  | -1.60170800 | 2.31508000  |
| H | 1.96611500  | 0.10669700  | 2.01971400  |
| H | 0.63457800  | -0.98508900 | 2.34793000  |
| C | 0.89751200  | -2.67804600 | 0.19788000  |
| H | 0.97715900  | -2.99919600 | -0.84855700 |
| H | 1.50790900  | -3.37610000 | 0.78284600  |

**TS\_6-7**

Sum of electronic and thermal Free  
Energies = -781.16491

|   |             |             |             |
|---|-------------|-------------|-------------|
| C | 2.84576100  | 0.97995300  | -1.59493400 |
| C | 2.54244000  | 1.34795900  | -0.02017600 |
| C | 3.41885000  | 0.21130400  | -0.43681500 |
| C | 1.19259300  | 1.13355900  | -0.30513700 |
| C | 2.89262400  | -1.21580000 | -0.25070300 |
| C | 0.57444400  | -0.22963700 | -0.38609600 |
| C | 1.48311600  | -1.25861800 | 0.36847200  |
| H | 3.36506500  | 1.82688500  | -2.03393800 |
| H | 2.89902400  | -1.72456000 | -1.22197500 |
| H | 0.55234300  | 2.01308900  | -0.35760100 |
| H | 0.53447400  | -0.51949600 | -1.44778400 |
| H | 2.16190900  | 0.46285000  | -2.25661300 |
| H | 4.47365400  | 0.38501900  | -0.24138200 |
| H | -1.18352600 | 2.61775900  | -0.67303300 |
| H | 3.58542800  | -1.76040700 | 0.39764200  |
| C | 3.08204100  | 2.65998400  | 0.47612600  |
| H | 3.11936800  | 2.62706700  | 1.56876500  |
| H | 4.09712500  | 2.83208200  | 0.11183200  |
| H | 2.44528100  | 3.49625200  | 0.17725200  |
| C | -0.58731900 | -2.74613200 | 0.64331000  |
| H | -0.66907200 | -2.56986000 | 1.72309800  |
| H | -0.96645900 | -3.75887500 | 0.46728500  |
| C | -0.88379500 | -0.29082400 | 0.10991900  |
| H | -0.87848300 | -0.13193200 | 1.19658800  |
| C | -1.44704800 | -1.72425700 | -0.10676300 |
| C | -1.55929900 | -2.11655500 | -1.59151000 |
| H | -1.92300100 | -3.14679900 | -1.65694600 |
| H | -2.27409000 | -1.48838600 | -2.12913800 |
| H | -0.61100900 | -2.08137300 | -2.13712100 |
| C | -2.86510100 | -1.53357600 | 0.44911500  |
| H | -3.55285000 | -2.31074800 | 0.10353200  |
| H | -2.83841500 | -1.58499200 | 1.54393600  |
| C | -1.98417000 | 0.62338100  | -0.47065900 |
| H | -1.92677700 | 0.58155000  | -1.56754500 |
| C | -3.28162600 | -0.11550800 | -0.01296600 |
| H | -3.76180600 | 0.42107100  | 0.80976200  |
| H | -4.01090000 | -0.14764800 | -0.82662000 |
| C | -1.97434300 | 2.12251100  | -0.09063000 |
| C | -1.70468300 | 2.37542300  | 1.39428100  |
| H | -0.69951000 | 2.05891300  | 1.70356900  |
| H | -1.80010500 | 3.43967000  | 1.62695700  |
| H | -2.42039000 | 1.83585900  | 2.02459300  |
| C | -3.27499500 | 2.80404900  | -0.53297100 |
| H | -3.50000400 | 2.58389400  | -1.58146200 |
| H | -4.12590700 | 2.47591700  | 0.07063400  |
| H | -3.19389900 | 3.88914200  | -0.42589100 |
| C | 1.60091000  | -0.92562100 | 1.86909400  |
| H | 2.20801700  | -1.69416000 | 2.35703800  |
| H | 2.08733600  | 0.03655000  | 2.05840200  |
| H | 0.63507000  | -0.90829700 | 2.37547800  |
| C | 0.88223400  | -2.66873100 | 0.20571600  |
| H | 0.96945000  | -2.97669300 | -0.84389800 |
| H | 1.48684900  | -3.37652800 | 0.78454800  |

**IM7**

Sum of electronic and thermal Free  
Energies = -781.179705

|   |            |            |             |
|---|------------|------------|-------------|
| C | 3.09788700 | 0.91189400 | -1.56459800 |
|---|------------|------------|-------------|



|   |             |             |             |
|---|-------------|-------------|-------------|
| C | 2.44359200  | 1.48273700  | -0.29014400 |
| C | 3.38288300  | 0.06333500  | -0.42266300 |
| C | 1.22152100  | 1.02106700  | 0.16242400  |
| C | 2.77440300  | -1.31157900 | -0.27700500 |
| C | 0.54883700  | -0.21422100 | -0.25802100 |
| C | 1.40557700  | -1.37088000 | 0.43923200  |
| H | 3.86879300  | 1.57763200  | -1.94056100 |
| H | 2.65500700  | -1.73664500 | -1.28000300 |
| H | 0.79702700  | 1.54538100  | 1.02141000  |
| H | 0.65996300  | -0.36392300 | -1.34104300 |
| H | 2.41632400  | 0.52062800  | -2.31490400 |
| H | 4.27113100  | 0.28704700  | 0.16351900  |
| H | -0.80508600 | 2.52621300  | -0.28645700 |
| H | 3.48720100  | -1.93842700 | 0.26906000  |
| C | 3.09859800  | 2.69303700  | 0.33288300  |
| H | 2.82872800  | 2.79751200  | 1.38616500  |
| H | 4.18735800  | 2.63131200  | 0.26273100  |
| C | 2.78558600  | 3.59533700  | -0.19970400 |
| C | -0.76097900 | -2.76233500 | 0.57710000  |
| H | -0.88104100 | -2.60498800 | 1.65697600  |
| H | -1.16375400 | -3.75740300 | 0.35930700  |
| C | -0.92118300 | -0.30809700 | 0.14354400  |
| H | -0.97061900 | -0.21249200 | 1.23922400  |
| C | -1.53357900 | -1.68464600 | -0.18615600 |
| C | -1.55038700 | -2.00000000 | -1.69370600 |
| H | -1.92462600 | -3.01795800 | -1.84186900 |
| H | -2.21648600 | -1.32841000 | -2.24116000 |
| H | -0.56679600 | -1.94544300 | -2.17013700 |
| C | -2.97978000 | -1.43680100 | 0.27364000  |
| H | -3.68019100 | -2.16828900 | -0.13960900 |
| C | -3.03412600 | -1.51166600 | 1.36638200  |
| H | -1.91425100 | 0.69936500  | -0.45441800 |
| H | -1.74673300 | 0.72780100  | -1.54092500 |
| C | -3.28889000 | 0.01429000  | -0.18350600 |
| H | -3.85520700 | 0.54690700  | 0.58514500  |
| H | -3.90704800 | 0.02801700  | -1.08498400 |
| C | -1.79687600 | 2.15525900  | 0.03080400  |
| C | -1.90346600 | 2.32680300  | 1.54871200  |
| H | -1.12606700 | 1.78946000  | 2.10394100  |
| H | -1.82633200 | 3.38438600  | 1.81664700  |
| H | -2.86851800 | 1.96831300  | 1.92102500  |
| C | -2.83425500 | 3.03327500  | -0.67659800 |
| H | -2.76805200 | 2.92934700  | -1.76406100 |
| H | -3.84887100 | 2.75386000  | -0.37291500 |
| H | -2.69208300 | 4.08797400  | -0.42608300 |
| C | 1.59264700  | -1.13710100 | 1.94690600  |
| H | 2.11329100  | -1.99586600 | 2.38015000  |
| H | 2.19164400  | -0.24624900 | 2.16627500  |
| H | 0.63954900  | -1.03502200 | 2.47071300  |
| C | 0.72886100  | -2.73218700 | 0.19651000  |
| H | 0.83433300  | -3.00305700 | -0.86038500 |
| H | 1.27843400  | -3.49057900 | 0.76649800  |

**IM8**

Sum of electronic and thermal Free  
Energies = -781.11325

|   |             |             |             |
|---|-------------|-------------|-------------|
| C | 0.52466500  | 0.75482500  | -0.17117700 |
| C | -2.48488300 | -0.01444600 | -1.44090900 |
| C | -1.59363900 | -1.73511500 | 1.09642000  |
| C | -1.10136500 | -0.88092400 | 2.03426600  |
| C | 1.24704600  | 1.02264500  | 0.93450600  |
| C | 4.00349200  | 0.32935200  | -0.06465400 |
| H | 0.54445900  | -0.27114300 | -0.54156900 |
| H | -0.06614800 | -0.94160700 | 2.34853500  |
| H | 3.82671900  | 1.29048400  | -0.54881500 |
| C | -2.92615800 | -1.68190100 | 0.62750200  |
| H | -0.91259400 | -2.41929800 | 0.59700000  |
| C | -3.50450100 | -1.10289700 | -1.67222200 |
| H | -3.43197300 | -1.50795500 | -2.68555600 |
| H | -4.52470900 | -0.73881600 | -1.54527900 |
| C | -3.25759300 | -2.29502600 | -0.68331400 |
| H | -2.43310800 | -2.91652700 | -1.03862600 |
| H | -4.16667100 | -2.90290800 | -0.61276400 |
| C | -2.70602800 | 1.20534900  | -0.92724900 |
| H | -1.45909100 | -0.29880000 | -1.67350700 |

|   |             |             |             |
|---|-------------|-------------|-------------|
| C | -1.58901400 | 2.18607700  | -0.64424700 |
| C | -0.15798400 | 1.79040700  | -1.03446100 |
| H | -0.15245500 | 1.44764000  | -2.07503100 |
| H | 0.44480200  | 2.70414000  | -1.02245400 |
| C | 2.10961400  | -0.03235300 | 1.58280600  |
| H | 1.91039400  | -0.07471300 | 2.66458900  |
| H | 1.88793200  | -1.01718500 | 1.14975300  |
| C | 3.61895400  | 0.24649200  | 1.38760200  |
| H | 4.18035200  | -0.53662600 | 1.90364900  |
| H | 3.87654500  | 1.18556100  | 1.89077200  |
| C | 4.51849700  | -0.65360300 | -0.81563000 |
| C | 4.86729900  | -0.42582400 | -2.26312800 |
| H | 4.32187100  | -1.12293300 | -2.90966300 |
| H | 4.63831100  | 0.59387400  | -2.58064900 |
| C | 4.81546800  | -2.04343200 | -0.31591400 |
| H | 4.30951800  | -2.78492900 | -0.94490400 |
| H | 5.88869200  | -2.25239600 | -0.38962800 |
| H | 4.50814500  | -2.20995200 | 0.71773200  |
| H | -1.84384800 | 3.12539000  | -1.15254200 |
| H | -1.61706700 | 2.42412000  | 0.43020600  |
| C | -4.06599100 | 1.76339900  | -0.58875900 |
| H | -4.89628700 | 1.10395600  | -0.84295700 |
| H | -4.12923700 | 2.00651100  | 0.47904100  |
| H | -4.22191900 | 2.70386500  | -1.12730800 |
| C | -4.02898600 | -1.06600400 | 1.39316900  |
| H | -4.80677500 | -0.67326800 | 0.73635100  |
| H | -4.48377200 | -1.88895100 | 1.96806700  |
| H | -3.71388700 | -0.30809800 | 2.10983100  |
| C | 1.37803600  | 2.41099000  | 1.50734800  |
| H | 0.54254400  | 3.06013400  | 1.24011400  |
| H | 1.45201900  | 2.37760300  | 2.59911900  |
| H | 2.29713700  | 2.88753500  | 1.14324300  |
| H | -1.70606200 | -0.10550400 | 2.49484100  |
| H | 5.93459500  | -0.60727000 | -2.43332600 |

**TS\_8-9a**

Sum of electronic and thermal Free  
Energies = -781.10135

|   |             |             |             |
|---|-------------|-------------|-------------|
| C | 0.61440900  | 0.20799600  | -0.49353900 |
| C | -2.18048100 | -1.45469400 | -0.13438700 |
| C | -1.29280400 | -0.94045900 | 1.68830600  |
| C | -0.69391400 | 1.92973300  | 0.88220400  |
| C | 1.21363900  | 1.43490300  | -0.37349000 |
| C | 3.70491900  | -0.08994900 | -0.43331500 |
| H | 0.71969800  | -0.45462000 | -0.36504800 |
| H | 0.11141200  | 2.52859500  | 1.28926900  |
| H | 3.66610800  | -0.12033200 | -1.52272000 |
| C | -2.58353800 | 0.49571600  | 1.54672400  |
| H | -0.66192300 | 0.44704500  | 2.42553400  |
| C | -3.16541600 | -1.81928100 | 0.94973300  |
| H | -3.00412700 | -2.83401400 | 1.32377200  |
| H | -4.19267300 | -1.77305000 | 0.58557700  |
| C | -2.98843100 | -0.81897200 | 2.14664600  |
| H | -2.21123000 | -1.17914900 | 2.82536600  |
| H | -3.92688500 | -0.74044800 | 2.70506900  |
| C | -2.45146700 | -0.86573200 | -1.30771000 |
| H | -1.13647200 | -1.55507500 | 0.16143800  |
| C | -1.38613100 | -0.21755900 | -2.16154200 |
| C | 0.08715200  | -0.40573400 | -1.76392600 |
| H | 0.29380500  | -1.48027200 | -1.69877500 |
| H | 0.69309200  | -0.02039900 | -2.59136600 |
| C | 2.23552300  | 1.64318400  | 0.71750900  |
| H | 2.23841400  | 2.68504900  | 1.06172800  |
| H | 1.99958400  | 0.99845000  | 1.57323600  |
| C | 3.65169400  | 1.27756400  | 0.20022400  |
| H | 4.34178000  | 1.35200100  | 1.04619700  |
| H | 3.97646200  | 2.03200900  | -0.52287500 |
| C | 3.76944400  | -1.25996200 | 0.21866900  |
| C | 3.78707100  | -2.56954100 | -0.52314400 |
| H | 2.95627400  | -3.20936100 | -0.20181900 |
| H | 3.71875800  | -2.42603600 | -1.60393200 |
| C | 3.83054200  | -1.38035700 | 1.71837900  |
| H | 2.94127100  | -1.90154400 | 2.09532100  |
| H | 4.69268400  | -1.98689700 | 2.01541600  |

|   |             |             |             |
|---|-------------|-------------|-------------|
| H | 3.90448100  | -0.41750400 | 2.22745300  |
| H | -1.49578800 | -0.56616400 | -3.19596900 |
| H | -1.61276000 | 0.85986600  | -2.19956100 |
| C | -3.82824200 | -0.72470300 | -1.90594700 |
| H | -4.61884700 | -1.15340700 | -1.29011300 |
| H | -4.07046600 | 0.32689200  | -2.10004200 |
| H | -3.85686900 | -1.23544300 | -2.87472500 |
| C | -3.64000400 | 1.24319400  | 0.80274700  |
| H | -4.40245000 | 0.56962200  | 0.40878900  |
| H | -4.13667400 | 1.91484200  | 1.51513900  |
| H | -3.25245600 | 1.85935400  | -0.01185400 |
| C | 1.19032500  | 2.44650500  | -1.48288100 |
| H | 0.36221200  | 2.29314900  | -2.17753800 |
| H | 1.12893600  | 3.46303900  | -1.07985800 |
| H | 2.12544300  | 2.38982400  | -2.05378600 |
| H | -1.24502000 | 2.37868400  | 0.06038000  |
| H | 4.70849900  | -3.12132300 | -0.30734800 |

### IM9a

Sum of electronic and thermal Free  
Energies = -781.13135

|   |             |             |             |
|---|-------------|-------------|-------------|
| C | 1.07335465  | 0.61713045  | 0.03012240  |
| C | -1.60157736 | -0.23730206 | -1.69927127 |
| C | -0.88471383 | -1.21255215 | 1.17932575  |
| C | -0.52763180 | 0.00309133  | 1.99618902  |
| C | 0.83762128  | 0.63020242  | 1.58756946  |
| C | 2.74583167  | 0.52377100  | -0.04377248 |
| H | 0.61610425  | -0.31147054 | -0.32571104 |
| H | -0.45225193 | -0.20994905 | 3.07185230  |
| H | 3.09405349  | 1.48313237  | -0.42866075 |
| C | -2.09615629 | -1.54268331 | 0.71321252  |
| H | -0.04514546 | -1.79406453 | 0.78983912  |
| C | -2.49563174 | -1.44828243 | -1.75822675 |
| H | -2.33235205 | -2.02218999 | -2.67601183 |
| H | -3.54856070 | -1.15962269 | -1.75325939 |
| C | -2.21241855 | -2.38683515 | -0.53240352 |
| H | -1.27408903 | -2.92023948 | -0.70355569 |
| H | -3.01580299 | -3.12827341 | -0.46618910 |
| C | -1.92848857 | 0.99431691  | -1.28454286 |
| H | -0.54418740 | -0.46511617 | -1.84811455 |
| C | -0.93209475 | 2.05777072  | -0.86603922 |
| C | 0.57522452  | 1.76538466  | -0.85658925 |
| H | 0.87597574  | 1.56758112  | -1.89031544 |
| C | 1.08713532  | 2.68770020  | -0.55918601 |
| C | 1.98380757  | -0.21754894 | 2.16302352  |
| H | 2.10722767  | -0.02690036 | 3.23293519  |
| H | 1.74897059  | -1.28297429 | 2.06428155  |
| C | 3.23252344  | 0.15568906  | 1.36201084  |
| H | 3.97924339  | -0.64315105 | 1.33455006  |
| H | 3.72508449  | 1.03022246  | 1.79187056  |
| C | 2.64180561  | -0.48437858 | -1.04409631 |
| C | 2.59868826  | -0.14119454 | -2.48782430 |
| H | 2.80538417  | 0.90766858  | -2.69234539 |
| H | 3.34477302  | -0.76564293 | -2.99568772 |
| C | 2.61447280  | -1.93259429 | -0.71671171 |
| H | 1.95943963  | -2.48687485 | -1.39450842 |
| H | 3.63822674  | -2.29532979 | -0.89725652 |
| H | 2.36666299  | -2.14685813 | 0.32045212  |
| H | -1.07199373 | 2.94453847  | -1.49859216 |
| H | -1.24238352 | 2.38341318  | 0.13623739  |
| C | -3.34604948 | 1.48296030  | -1.11038300 |
| H | -4.09331781 | 0.78159378  | -1.48055489 |
| H | -3.56475241 | 1.69974128  | -0.05831952 |
| H | -3.47656498 | 2.42223650  | -1.65954491 |
| C | -3.38305446 | -0.97220381 | 1.23837205  |
| H | -4.03878495 | -0.63494619 | 0.43112423  |
| H | -3.92336187 | -1.76172365 | 1.77386075  |
| H | -3.23447899 | -0.14763013 | 1.93863669  |
| C | 0.94255629  | 2.06086689  | 2.12798326  |
| H | 0.16278356  | 2.71063808  | 1.72411607  |
| H | 0.82801196  | 2.04532652  | 3.21606896  |
| H | 1.91140965  | 2.51938605  | 1.90215338  |
| H | -1.31520151 | 0.75655019  | 1.88502808  |
| H | 1.63105576  | -0.42786371 | -2.91984180 |

### TS\_9a-9b

Sum of electronic and thermal Free  
Energies = -781.13096

|   |             |             |             |
|---|-------------|-------------|-------------|
| C | 1.01742638  | 0.54143356  | -0.00212920 |
| C | -1.80077857 | -0.35615406 | -1.59560105 |
| C | -1.02663042 | -1.17206416 | 1.26430868  |
| C | -0.59351202 | 0.06517972  | 2.00949000  |
| C | 0.78392368  | 0.61036263  | 1.53821850  |
| C | 2.58757832  | 0.54188925  | -0.15168535 |
| H | 0.65702364  | -0.43683086 | -0.32137643 |
| H | -0.50921327 | -0.09910984 | 3.09330430  |
| H | 2.95210475  | 1.55819472  | -0.32523826 |
| C | -2.26901128 | -1.49677993 | 0.88763190  |
| H | -0.22774340 | -1.78920262 | 0.84839627  |
| C | -2.74144369 | -1.53183328 | -1.57101052 |
| H | -2.61974517 | -2.16202281 | -2.45799675 |
| H | -3.78226837 | -1.20185399 | -1.56152359 |
| C | -2.46607937 | -2.40807256 | -0.29916686 |
| H | -1.56067762 | -3.00405277 | -0.46391313 |
| H | -3.30065161 | -3.10411644 | -0.16264115 |
| C | -2.07968169 | 0.91217201  | -1.26862595 |
| H | -0.75180957 | -0.63128598 | -1.71817362 |
| C | -1.03364915 | 1.95614360  | -0.93737007 |
| C | 0.45848189  | 1.60960395  | -0.96091628 |
| H | 0.72802961  | 1.30605522  | -1.98457955 |
| H | 0.99761983  | 2.54796134  | -0.77583503 |
| C | 1.89836100  | -0.31364807 | 2.05858716  |
| H | 2.08531302  | -0.17059136 | 3.12795195  |
| H | 1.60741348  | -1.36220959 | 1.92394830  |
| C | 3.14994649  | -0.00296844 | 1.23460114  |
| H | 3.81350239  | -0.86771421 | 1.13325704  |
| H | 3.74771830  | 0.80577440  | 1.66007370  |
| C | 3.08715792  | -0.34795401 | -1.17683035 |
| C | 4.06020905  | 0.14415685  | -2.16339943 |
| H | 3.68440450  | 1.07337295  | -2.61123086 |
| H | 4.96257365  | 0.44666396  | -1.60765156 |
| C | 2.64935331  | -1.74890254 | -1.25176520 |
| H | 1.94112853  | -1.78355271 | -2.10013546 |
| H | 3.47489054  | -2.40920111 | -1.53429070 |
| H | 2.13138610  | -2.10243186 | -0.35999691 |
| H | -1.16853778 | 2.81550439  | -1.60824561 |
| H | -1.29110216 | 2.34333041  | 0.05914734  |
| C | -3.47467747 | 1.46720941  | -1.11434192 |
| H | 4.25429507  | 0.76595751  | -1.41119727 |
| H | -3.66395955 | 1.77739724  | -0.07982898 |
| H | -3.58345613 | 2.36263273  | -1.73678266 |
| C | -3.51173967 | -0.84964740 | 1.42942479  |
| H | -4.16849173 | -0.50341605 | 0.62578026  |
| H | -4.07963612 | -1.59197634 | 2.00234396  |
| H | -3.30265657 | -0.01086536 | 2.09663975  |
| C | 0.98443902  | 2.03362788  | 2.06993143  |
| H | 0.23795773  | 2.72093794  | 1.66228100  |
| H | 0.88536694  | 2.04540168  | 3.15961952  |
| H | 1.97387049  | 2.43654791  | 1.82374285  |
| H | -1.34945032 | 0.84769315  | 1.87778445  |
| H | 4.32989943  | -0.58392652 | -2.92725924 |

### IM9b

Sum of electronic and thermal Free  
Energies = -781.13175

|   |             |             |             |
|---|-------------|-------------|-------------|
| C | 1.00350500  | 0.24239100  | -0.49336300 |
| C | -1.93102300 | -1.32416400 | -0.91581300 |
| C | -1.06853800 | 0.18525000  | 1.61756300  |
| C | -0.53938800 | 1.53432700  | 1.20018600  |
| C | 0.83515500  | 1.44960900  | 0.48433500  |
| C | 2.51723400  | 0.02194900  | -0.58772900 |
| H | 0.56586600  | -0.62458600 | 0.00076100  |
| H | -0.41184300 | 2.22400300  | 2.04744900  |
| H | 2.99628000  | 0.52680400  | -1.42819300 |
| C | -2.34232100 | -0.22452800 | 1.60513200  |

|   |             |             |             |
|---|-------------|-------------|-------------|
| H | -0.32305500 | -0.59438900 | 1.78634600  |
| C | -2.93160100 | -2.02290100 | -0.03320400 |
| H | -2.89094800 | -3.10893500 | -0.16500500 |
| H | -3.95122300 | -1.71578000 | -0.27504700 |
| C | -2.64022200 | -1.69786300 | 1.47374300  |
| H | -1.77447200 | -2.28324600 | 1.80504800  |
| H | -3.50109600 | -2.00944500 | 2.07484600  |
| C | -2.12344300 | -0.20508900 | -1.62601500 |
| H | -0.90924100 | -1.69174200 | -0.80838800 |
| C | -1.00840200 | 0.65387200  | -2.18563200 |
| C | 0.46026500  | 0.29847900  | -1.93658000 |
| H | 0.67021000  | -0.67675400 | -2.39858000 |
| H | 1.05672500  | 1.02944800  | -2.49868100 |
| C | 1.92329200  | 1.15004600  | 1.53415400  |
| H | 2.17106700  | 2.03156000  | 2.13620300  |
| H | 1.57807100  | 0.37845400  | 2.23121500  |
| C | 3.17760600  | 0.66940600  | 0.80629300  |
| H | 3.79212900  | 0.02128500  | 1.44441000  |
| H | 3.84467300  | 1.44562100  | 0.42853200  |
| C | 3.18155500  | -1.16003900 | -0.17908600 |
| C | 4.55447700  | -1.45236700 | -0.67277100 |
| H | 4.44479800  | -2.26110200 | -1.40987500 |
| H | 5.01542800  | -0.59948600 | -1.17241700 |
| C | 2.52227100  | -2.18707000 | 0.67483000  |
| H | 1.96601300  | -2.84080500 | -0.01360300 |
| H | 3.24630500  | -2.79989700 | 1.21287300  |
| H | 1.79074700  | -1.76469800 | 1.36574600  |
| H | -1.13490800 | 0.72893300  | -3.27425900 |
| H | -1.19431500 | 1.67359200  | -1.81774800 |
| C | -3.47559800 | 0.39921300  | -1.91775900 |
| H | -4.30804400 | -0.23207600 | -1.60777400 |
| H | -3.58415700 | 1.37695700  | -1.43329300 |
| H | -3.57558900 | 0.56920600  | -2.99575500 |
| C | -3.52383300 | 0.69703000  | 1.49919700  |
| H | -4.21200700 | 0.38075700  | 0.70977600  |
| H | -4.08649500 | 0.66373700  | 2.43946500  |
| H | -3.24223000 | 1.73729900  | 1.32251400  |
| C | 1.13884700  | 2.78058300  | -0.21222100 |
| H | 0.41337900  | 2.98977800  | -1.00253400 |
| H | 1.09216200  | 3.60333700  | 0.50776700  |
| H | 2.13552000  | 2.79716400  | -0.66985000 |
| H | -1.26063600 | 2.01118700  | 0.52671700  |
| H | 5.20185500  | -1.83497500 | 0.11978400  |

**TS\_9b-10a**

Sum of electronic and thermal Free  
Energies = -781.11374

|   |             |             |             |
|---|-------------|-------------|-------------|
| C | 0.92080467  | 0.58874750  | -0.65791002 |
| C | -2.18779525 | -0.16420521 | -1.62566395 |
| C | -0.91757992 | -1.19605353 | 0.91684200  |
| C | -0.42091675 | 0.03567488  | 1.63054747  |
| C | 1.00448195  | 0.50680021  | 1.29979831  |
| C | 2.29801380  | 0.70314340  | -0.57947344 |
| H | 0.51848524  | -0.40441763 | -0.82466701 |
| H | -0.36192566 | -0.11083895 | 2.72194424  |
| H | 2.70262768  | 1.72038224  | -0.56725014 |
| C | -2.20537502 | -1.52923847 | 0.77206850  |
| H | -0.19530163 | -1.75607686 | 0.32409597  |
| C | -3.11790131 | -1.34603707 | -1.53514864 |
| H | -3.16390465 | -1.88674285 | -2.48534089 |
| H | -4.13674461 | -1.02910849 | -1.30318820 |
| C | -2.62237993 | -2.34206439 | -0.42630999 |
| H | -1.76943293 | -2.91244828 | -0.80976848 |
| H | -3.42585320 | -3.05028131 | -0.20044541 |
| C | -2.39005892 | 1.06707935  | -1.13842545 |
| H | -1.19158723 | -0.41409136 | -1.99342206 |
| C | -1.29285972 | 2.09670458  | -0.96253600 |
| C | 0.15934181  | 1.74680814  | -1.29949466 |
| H | 0.20777587  | 1.51109661  | -2.37188320 |
| H | 0.75618817  | 2.65785524  | -1.17453006 |
| C | 2.01831055  | -0.53390063 | 1.77204179  |
| H | 2.06054404  | -0.41219652 | 2.86251054  |
| H | 1.62346250  | -1.53820551 | 1.59637577  |
| C | 3.41011227  | -0.39325070 | 1.18261961  |

|   |             |             |             |
|---|-------------|-------------|-------------|
| H | 4.05934896  | -1.22546405 | 1.47364588  |
| H | 3.89416892  | 0.52810612  | 1.52615097  |
| C | 3.29747526  | -0.37320316 | -0.37515874 |
| C | 4.64808271  | 0.03835471  | -0.98332982 |
| H | 4.59723467  | 0.07429727  | -2.07474298 |
| H | 4.97398509  | 1.01615572  | -0.61594968 |
| C | 2.86092144  | -1.73543273 | -0.92494550 |
| H | 2.72299358  | -1.68521386 | -2.00893103 |
| H | 3.63956168  | -2.47483738 | -0.71943014 |
| H | 1.93266112  | -2.10344639 | -0.48168818 |
| H | -1.53529139 | 2.97732658  | -1.57254458 |
| H | -1.35614368 | 2.46250642  | 0.07233427  |
| C | -3.71928514 | 1.59320921  | -0.65503897 |
| H | -4.54885413 | 0.91453061  | -0.85161299 |
| H | -3.69539375 | 1.80662391  | -0.4261508  |
| H | -3.94403321 | 2.54027458  | -1.15848401 |
| C | -3.31522393 | -0.94192821 | 1.59518696  |
| H | -4.13448381 | -0.58013089 | 0.96767459  |
| H | -3.73285750 | -1.72681122 | 2.23650185  |
| H | -2.98685591 | -0.12761284 | 2.24547835  |
| C | 1.25591934  | 1.91624477  | 1.80637587  |
| H | 0.65304374  | 2.65232070  | 1.26907045  |
| H | 0.95151456  | 1.95391480  | 2.85817196  |
| H | 2.30568293  | 2.21190652  | 1.75287964  |
| H | -1.12345111 | 0.86014163  | 1.47383794  |
| H | 5.40746329  | -0.69762598 | -0.70649717 |

**IM10a**

Sum of electronic and thermal Free  
Energies = -781.12555

|   |             |             |             |
|---|-------------|-------------|-------------|
| C | 0.99161556  | 0.59687665  | -1.53774412 |
| C | -2.19287585 | -0.11408724 | -1.80987609 |
| C | -0.92323817 | -0.95827166 | 0.91338023  |
| C | -0.51934780 | 0.06724452  | 1.94017562  |
| C | 0.90244931  | 0.41791594  | 2.01800552  |
| C | 2.10340831  | 0.77094235  | -0.80778768 |
| H | 0.68986985  | -0.41901793 | -1.78620008 |
| H | -0.67005469 | -0.33294524 | 2.96969199  |
| H | 2.43125182  | 1.79573949  | -0.60240292 |
| C | -2.13543659 | -1.51685803 | 0.81008507  |
| H | -0.21033910 | -1.11923356 | 0.11165457  |
| C | -3.12404556 | -1.25250660 | -1.50090002 |
| H | -3.34680217 | -1.82374068 | -2.40697660 |
| H | -4.08169697 | -0.89760078 | -1.11048206 |
| C | -2.48281753 | -2.23421966 | -0.47003372 |
| H | -1.57901439 | -2.66688745 | -0.91323284 |
| H | -3.18265690 | -3.05466846 | -0.27989399 |
| C | -2.19070695 | 1.08319736  | -1.20955720 |
| H | -1.38831971 | -0.35145674 | -2.50525393 |
| C | -1.09239859 | 2.10919937  | -1.37627060 |
| C | 0.17634424  | 1.71204567  | -2.14247579 |
| H | -0.09341096 | 1.42966667  | -3.16690736 |
| H | 0.80753800  | 2.60320112  | -2.22331742 |
| C | 1.93799650  | -0.61756786 | 1.94141726  |
| H | 2.22461062  | -0.70431554 | 3.00977072  |
| H | 1.51936834  | -1.57924175 | 1.63962975  |
| C | 3.23103798  | -0.27180674 | 1.17321667  |
| H | 3.99256577  | -1.00042005 | 1.46909725  |
| H | 3.60152712  | 0.71162553  | 1.48454541  |
| C | 3.07516636  | -0.30151928 | -0.36349520 |
| C | 4.45594899  | 0.04936798  | -0.95382684 |
| H | 4.41354584  | 0.04725852  | -2.04598118 |
| H | 4.78795130  | 1.04072159  | -0.62883099 |
| C | 2.68391264  | -1.70370492 | -0.84156559 |
| H | 2.68895600  | -1.74895713 | -1.93406392 |
| H | 3.40737103  | -2.43881077 | -0.47521707 |
| H | 1.69072701  | -2.01619377 | -0.50372269 |
| H | -1.51414737 | 3.00776148  | -1.84605451 |
| H | -0.79638223 | 2.43374215  | -0.36349865 |
| C | -3.26510325 | 1.53717802  | -0.25197747 |
| H | -4.19743415 | 0.98151226  | -0.35637370 |
| H | -2.93620167 | 1.43598485  | 0.79174326  |
| H | -3.49098075 | 2.59691794  | -0.40903450 |
| C | -3.23873117 | -1.35412943 | 1.81582450  |

|   |             |             |             |
|---|-------------|-------------|-------------|
| H | -4.14700285 | -0.97938265 | 1.33116154  |
| H | -3.49246271 | -2.32616084 | 2.25241231  |
| H | -2.98686386 | -0.67138130 | 2.63139706  |
| C | 1.25317112  | 1.80040983  | 2.39263925  |
| H | 1.14687916  | 2.40812784  | 1.48116727  |
| H | 0.52032785  | 2.20065170  | 3.10138835  |
| H | 2.26904699  | 1.91168261  | 2.76993069  |
| H | -1.13037934 | 0.97863635  | 1.90236030  |
| H | 5.20632843  | -0.68274694 | -0.63878326 |

**TS\_10a-10b**

Sum of electronic and thermal Free  
Energies = -781.12350

|   |             |             |             |
|---|-------------|-------------|-------------|
| C | 1.01720827  | 0.55714594  | -1.59756621 |
| C | -2.19273305 | -0.04653561 | -1.82111559 |
| C | -0.95023583 | -1.06411209 | 0.99276558  |
| C | -0.52246109 | -0.24262997 | 2.20947378  |
| C | 0.81517462  | 0.35139406  | 2.02320494  |
| C | 2.11103760  | 0.76904353  | -0.85189849 |
| H | 0.70941718  | -0.46760627 | -1.80191413 |
| H | -0.42708799 | -0.91803148 | 3.07897325  |
| H | 2.42387468  | 1.80603466  | -0.68765394 |
| C | -2.18440585 | -1.54331174 | 0.80759080  |
| H | -0.20729708 | -1.19621918 | 0.21304289  |
| C | -3.16150091 | -1.14728506 | -1.49294754 |
| H | -3.44263009 | -1.68217324 | -2.40528934 |
| H | -4.08942229 | -0.75923075 | -1.06328286 |
| C | -2.52820921 | -2.17818266 | -0.51692696 |
| H | -1.62580321 | -2.59336228 | -0.97961833 |
| H | -3.23043350 | -3.00559250 | -0.36699795 |
| C | -2.09803150 | 1.14134113  | -1.21041283 |
| H | -1.45495176 | -0.29869976 | -2.58288696 |
| C | -1.00634619 | 2.14368672  | -1.51075028 |
| C | 0.22907505  | 1.65268105  | -2.27435524 |
| H | -0.06832959 | 1.30735689  | -3.27088415 |
| H | 0.88763097  | 2.51332427  | -2.43132123 |
| C | 1.97455396  | -0.54087265 | 1.97945546  |
| H | 2.23843275  | -0.50513684 | 3.06244292  |
| H | 1.66153148  | -1.57288826 | 1.79421404  |
| C | 3.23196860  | -0.14993562 | 1.19595928  |
| H | 4.03595310  | -0.81682067 | 1.52542230  |
| H | 3.54992162  | 0.86505671  | 1.45950392  |
| C | 3.08722939  | -0.26756426 | -0.33878325 |
| C | 4.46790046  | 0.06586968  | -0.93836117 |
| H | 4.43075907  | 0.01365422  | -2.02959191 |
| H | 4.79082032  | 1.07386621  | -0.65781843 |
| C | 2.71296347  | -1.69675095 | -0.74227695 |
| H | 2.73586503  | -1.80238825 | -1.83041036 |
| H | 3.43390637  | -2.40690454 | -0.32447572 |
| H | 1.71496609  | -1.99478769 | -0.40517660 |
| H | -1.44350932 | 2.99224199  | -2.05464802 |
| H | -0.66926447 | 2.57040506  | -0.55311734 |
| C | -3.05545839 | 1.62097383  | -0.14949713 |
| H | -3.95655883 | 1.01273724  | -0.06960006 |
| H | -2.56754940 | 1.62551721  | 0.83617446  |
| H | -3.36344609 | 2.65295397  | -0.35114556 |
| C | -3.30321531 | -1.42028535 | 1.80185496  |
| H | -4.19095056 | -0.98295996 | 1.33195040  |
| H | -3.59390391 | -2.41499182 | 2.15721794  |
| H | -3.04823438 | -0.81427326 | 2.67408827  |
| C | 0.94614340  | 1.81173590  | 2.10149152  |
| H | 0.22861858  | 2.26341122  | 1.40427982  |
| H | 0.59336995  | 2.11172374  | 3.10142710  |
| H | 1.94837049  | 2.19440222  | 1.92444033  |
| H | -1.25763713 | 0.52856360  | 2.45644408  |
| H | 5.22208933  | -0.64521555 | -0.58584048 |

**IM10b**

Sum of electronic and thermal Free  
Energies = -781.13116

|   |            |            |             |
|---|------------|------------|-------------|
| C | 1.05794309 | 0.60436818 | -2.02272670 |
|---|------------|------------|-------------|

|   |             |             |             |
|---|-------------|-------------|-------------|
| C | -1.99746214 | 0.03252142  | -1.65772325 |
| C | -0.55685602 | -1.63982999 | 1.56739899  |
| C | -0.22088851 | -1.42123059 | 3.07165286  |
| C | 0.51115525  | -0.48119086 | 2.25954724  |
| C | 1.84363388  | 0.87137951  | -0.97829843 |
| H | 1.06827631  | -0.40337895 | -2.43635971 |
| H | 0.32126624  | -2.26953702 | 3.48221281  |
| H | 1.87497012  | 1.89662986  | -0.59411044 |
| C | -1.79537328 | -1.30750293 | 1.04227350  |
| H | 0.01935298  | -2.39541707 | 1.04612326  |
| C | -2.96866134 | -1.01863615 | -1.20166345 |
| H | -3.30232269 | -1.62357820 | -2.05109638 |
| H | -3.86892534 | -0.59372851 | -0.75213826 |
| C | -2.26294144 | -1.97400754 | -0.21339250 |
| H | -1.42642317 | -2.48069355 | -0.70403067 |
| H | -2.96871816 | -2.75582644 | 0.11098003  |
| C | -2.04342742 | 1.35829321  | -1.46782836 |
| H | -1.13119375 | -0.37990846 | -2.16867820 |
| C | -0.91707664 | 2.26404843  | -1.91407165 |
| C | 0.20038013  | 1.62427257  | -2.74406755 |
| H | -0.23897953 | 1.16532045  | -3.63557561 |
| H | 0.84811198  | 2.43009897  | -3.10568134 |
| C | 1.97811619  | -0.82824844 | 2.03584890  |
| H | 2.38152762  | -0.77884087 | 3.05835112  |
| H | 2.07207716  | -1.88059399 | 1.74722206  |
| C | 2.89419648  | 0.05338688  | 1.17835594  |
| H | 3.90640101  | -0.22103497 | 1.49911875  |
| H | 2.77831761  | 1.10672648  | 1.46405051  |
| C | 2.86958447  | -0.05977744 | -0.36491334 |
| C | 4.24523558  | 0.43886473  | -0.86111291 |
| H | 4.27906849  | 0.44074191  | -1.95365731 |
| H | 4.44190947  | 1.45893645  | -0.51415094 |
| C | 2.68907287  | -1.51377041 | -0.80539738 |
| H | 2.87132619  | -1.62435344 | -1.87778740 |
| H | 3.40349854  | -2.16173529 | -0.28597490 |
| H | 1.67510332  | -1.87887053 | -0.60043087 |
| H | -1.35127254 | 3.09143010  | -2.48997849 |
| H | -0.48479187 | 2.73562372  | -1.01775093 |
| C | -3.19120941 | 2.10178676  | -0.83179151 |
| H | -4.00563187 | 1.45635014  | -0.49757289 |
| H | -2.84474263 | 2.70080539  | 0.02030757  |
| H | -3.61434054 | 2.81084577  | -1.55122946 |
| C | -2.75890731 | -0.37369926 | 1.67921989  |
| H | -2.69155756 | 0.58561973  | 1.14713204  |
| H | -3.78035053 | -0.73706904 | 1.53576711  |
| H | -2.58565116 | -0.19535843 | 2.73803582  |
| C | 0.12036404  | 0.96591438  | 2.14531011  |
| H | 0.18838042  | 1.30662074  | 1.10758582  |
| H | -0.87161604 | 1.17526935  | 2.54220501  |
| H | 0.84018361  | 1.54279652  | 2.73668638  |
| H | -1.05428337 | -1.07754429 | 3.67449072  |
| H | 5.04709362  | -0.20717537 | -0.48786865 |

**TS\_10b-10c**

Sum of electronic and thermal Free  
Energies = -781.12380

|   |             |             |             |
|---|-------------|-------------|-------------|
| C | 1.08220080  | 0.33667631  | -1.72305482 |
| C | -2.27664493 | 0.06809754  | -1.51957016 |
| C | -0.90286663 | -1.89775394 | 1.00411279  |
| C | 0.04422436  | -1.53431772 | 2.13290850  |
| C | 0.77772723  | -0.26298238 | 1.92281911  |
| C | 2.10487983  | 0.80993657  | -1.00430563 |
| H | 0.87574065  | -0.73383290 | -1.73868005 |
| H | 0.74489374  | -2.34715967 | 2.33513058  |
| H | 2.28519732  | 1.89001465  | -1.03766055 |
| C | -2.20342638 | -1.59133992 | 0.93203065  |
| H | -0.44210352 | -2.46599158 | 0.19910916  |
| C | -3.45663732 | -0.75493556 | -1.08415762 |
| H | -4.00132470 | -1.10509420 | -1.96847426 |
| H | -4.16827025 | -0.16997652 | -0.49615568 |
| C | -3.00177038 | -1.99249167 | -0.28242603 |
| H | -2.39908655 | -2.64267396 | -0.92517153 |
| H | -3.88205749 | -2.56603419 | 0.03012331  |
| C | -2.02900497 | 1.36355953  | -1.27878379 |
| H | -1.54880852 | -0.48945252 | -2.11049848 |
| C | -0.81442391 | 2.07660146  | -1.83434999 |

|   |             |             |             |
|---|-------------|-------------|-------------|
| C | 0.22876704  | 1.24191551  | -2.58815537 |
| H | -0.25929920 | 0.65956772  | -3.37526756 |
| H | 0.89557539  | 1.94288776  | -3.10033251 |
| C | 2.21396467  | -0.21520637 | 2.20320053  |
| H | 2.22661362  | 0.34537762  | 3.16160166  |
| H | 2.59625141  | -1.21580223 | 2.40951524  |
| C | 3.16208184  | 0.54831699  | 1.24649366  |
| H | 4.16037681  | 0.41081423  | 1.67491196  |
| H | 2.95793695  | 1.62388762  | 1.27383912  |
| C | 3.15339931  | 0.05009545  | -0.22177675 |
| C | 4.52268118  | 0.42181233  | -0.82651486 |
| H | 4.54975890  | 0.17055173  | -1.88993604 |
| H | 4.71841155  | 1.49445856  | -0.72682253 |
| C | 2.96806771  | -1.46524427 | -0.30479035 |
| H | 3.06979361  | -1.80429319 | -1.3305409  |
| H | 3.72450038  | -1.98462936 | 0.29304104  |
| H | 1.97698374  | -1.78673902 | 0.04352699  |
| H | -1.17791191 | 2.86680074  | -2.50505804 |
| H | -0.31202009 | 2.61257666  | -1.01355177 |
| C | -2.93749160 | 2.27954554  | -0.49669337 |
| H | -3.84937961 | 1.79636939  | -0.14485667 |
| H | -2.41140053 | 2.69708010  | 0.37242785  |
| C | -3.23336775 | 3.13439095  | -1.11455777 |
| C | -2.95287180 | -0.78431290 | 1.95615710  |
| H | -3.09070898 | 0.24371990  | 1.59669909  |
| H | -3.95126075 | -1.20163137 | 2.11588949  |
| H | -2.45202502 | -0.73493608 | 2.92711346  |
| C | 0.01924327  | 0.94824413  | 1.59610170  |
| H | -0.56629406 | 0.75438876  | 0.68150122  |
| H | -0.73337048 | 1.09967525  | 2.38567181  |
| H | 0.63953326  | 1.83505077  | 1.47693838  |
| H | -0.53690029 | -1.36525605 | 3.05670456  |
| H | 5.32792277  | -0.12095464 | -0.32111028 |

#### IM10c

Sum of electronic and thermal Free  
Energies = -781.12919

|   |             |             |             |
|---|-------------|-------------|-------------|
| C | 1.25181766  | -0.22208890 | -1.70482985 |
| C | -2.54780704 | 0.30713607  | -1.39163339 |
| C | -1.26175860 | -1.85351170 | 0.48595397  |
| C | 0.03553500  | -1.85367881 | 1.24036776  |
| C | 0.62217298  | -0.53754373 | 1.58422723  |
| C | 1.77769893  | 0.59220786  | -0.77470165 |
| H | 1.73089764  | -1.18835255 | -1.86949404 |
| H | 0.80510449  | -2.47462053 | 0.76850689  |
| H | 1.32543067  | 1.57675088  | -0.62292274 |
| C | -2.47940579 | -1.62248568 | 0.99501392  |
| C | -1.15810432 | -1.99051549 | -0.58804181 |
| H | -3.69162509 | 0.04393881  | -0.45285339 |
| H | -4.64143506 | 0.18993731  | -0.98171236 |
| H | -3.69657992 | 0.74280950  | 0.39148962  |
| C | -3.65393073 | -1.41506651 | 0.06775428  |
| H | -3.58809671 | -2.09347418 | -0.78963086 |
| H | -4.58966520 | -1.64097430 | 0.58784940  |
| C | -1.71812396 | 1.35599195  | -1.46820210 |
| H | -2.39794049 | -0.49730709 | -2.11385088 |
| C | -0.62276350 | 1.39002025  | -2.52700275 |
| C | 0.17042841  | 0.09215219  | -2.70536314 |
| H | -0.50369606 | -0.76729459 | -2.78742990 |
| H | 0.68494863  | 0.12531095  | -3.67637794 |
| C | 1.99836880  | -0.48631513 | 2.10828334  |
| H | 1.87636189  | -0.20624431 | 3.16905094  |
| H | 2.47079851  | -1.47036594 | 2.07166304  |
| C | 2.89595787  | 0.59257223  | 1.46149760  |
| H | 3.86287262  | 0.56040924  | 1.97393864  |
| H | 2.47516852  | 1.58725016  | 1.64656790  |
| C | 3.09591051  | 0.38636292  | -0.05101433 |
| C | 4.06117624  | 1.48740730  | -0.53426627 |
| H | 4.23245813  | 1.40023112  | -1.61011956 |
| H | 3.65819570  | 2.48537065  | -0.33346978 |
| C | 3.72657252  | -0.98122701 | -0.33032857 |
| H | 4.01125458  | -1.06891207 | -1.38225941 |
| H | 4.63394399  | -1.10507805 | 0.26917365  |
| H | 3.05531304  | -1.81631575 | -0.10163529 |

|   |             |             |             |
|---|-------------|-------------|-------------|
| H | -1.08068921 | 1.64328411  | -3.49060416 |
| H | 0.06849768  | 2.21361042  | -2.31321813 |
| C | -1.84683483 | 2.61115906  | -0.64472538 |
| H | -2.60027599 | 2.53901124  | 0.14238609  |
| H | -0.88728767 | 2.88847742  | -0.18958978 |
| H | -2.12950248 | 3.44840642  | -1.29344806 |
| C | -2.78241194 | -1.44420858 | -2.45791022 |
| H | -3.22175074 | -0.45539339 | 2.64183165  |
| H | -3.53274735 | -2.17774570 | 2.77000099  |
| H | -1.91507545 | -1.56348360 | 3.11298213  |
| C | -0.24195498 | 0.64210562  | 1.68070068  |
| H | -0.89920822 | 0.69818528  | 0.80499835  |
| H | -0.91538427 | 0.45295855  | 2.53460968  |
| H | 0.30014161  | 1.56906009  | 1.86039950  |
| H | -0.07788203 | -2.30071041 | 2.25187487  |
| H | 5.02614925  | 1.40028010  | -0.02473402 |

#### TS\_10c-11

Sum of electronic and thermal Free  
Energies = -781.12499

|   |             |             |             |
|---|-------------|-------------|-------------|
| C | 1.15218754  | -0.33528269 | -1.44692788 |
| C | -2.62834260 | 0.31559037  | -1.42545877 |
| C | -1.25201336 | -1.81003822 | 0.37844437  |
| C | 0.07257566  | -1.79937906 | 1.08151895  |
| C | 0.73002317  | -0.46153564 | 1.31150251  |
| C | 1.70263209  | 0.48955855  | -0.50900624 |
| H | 1.59631360  | -1.32553797 | -1.56600838 |
| H | 0.79086344  | -2.48421095 | 0.61902572  |
| H | 1.26875982  | 1.48673515  | -0.41206816 |
| C | -2.45130274 | -1.56449194 | 0.92735220  |
| H | -1.20826998 | -2.00554972 | -0.69109206 |
| C | -3.77996137 | 0.03483037  | -0.50541070 |
| H | -4.72843992 | 0.12102022  | -1.04877260 |
| H | -3.82442321 | 0.75129334  | 0.32183467  |
| C | -3.66930188 | -1.41078076 | 0.04483615  |
| H | -3.61449067 | -2.10357506 | -0.80208710 |
| H | -4.57663642 | -1.65662381 | 0.60477951  |
| C | -1.78238536 | 1.35166071  | -1.46033298 |
| H | -2.45167056 | -0.49478406 | -2.13517449 |
| C | -0.60773962 | 1.33297502  | -2.43011931 |
| C | 0.14682149  | 0.00250774  | -2.50103761 |
| H | -0.53196087 | -0.84297235 | -2.64814662 |
| H | 0.77060902  | -0.00550795 | -3.41267289 |
| C | 2.04314434  | -0.52258571 | 2.04511005  |
| H | 1.79019978  | -0.34264290 | 3.10071848  |
| H | 2.46543714  | -1.52871873 | 1.98190641  |
| C | 3.03530343  | 0.52085078  | 1.54910909  |
| H | 4.01323001  | 0.38920217  | 2.02182529  |
| H | 2.68870441  | 1.52990640  | 1.80240447  |
| C | 3.12818416  | 0.37204925  | 0.02277503  |
| C | 3.94133031  | 1.53774935  | -0.56290518 |
| H | 4.00741975  | 1.46717168  | -1.65213320 |
| H | 3.49553811  | 2.50374690  | -0.30565681 |
| C | 3.79783559  | -0.95202732 | -0.36120902 |
| H | 3.95637981  | -1.01152627 | -1.44201459 |
| H | 4.77773428  | -1.01890589 | 0.12009825  |
| H | 3.22110927  | -1.83222559 | -0.05878943 |
| H | -0.96680080 | 1.56666014  | -3.43920528 |
| H | 0.09195401  | 2.13922711  | -2.18038264 |
| C | -1.93940480 | 2.62030199  | -0.66441849 |
| H | -2.73279439 | 2.56177835  | 0.08305000  |
| H | -1.00533513 | 2.89923703  | -0.16125050 |
| H | -2.18498623 | 3.44842833  | -1.33954795 |
| C | -2.69739144 | -1.32788955 | 2.39286521  |
| H | -3.08855004 | -0.31358138 | 2.55897228  |
| H | -3.46386271 | -2.02123938 | 2.75339737  |
| H | -1.81232360 | -1.45907327 | 3.01922286  |
| C | -0.15956787 | 0.69569798  | 1.61033632  |
| H | -0.95317444 | 0.79218464  | 0.86769010  |
| H | -0.64333278 | 0.45934676  | 2.57040053  |
| H | 0.38643365  | 1.63124948  | 1.73766875  |
| H | -0.03484204 | -2.16942661 | 2.11765958  |
| H | 4.95862592  | 1.51743112  | -0.15991545 |

**IM11**Sum of electronic and thermal Free  
Energies = -781.13573

|   |             |             |             |
|---|-------------|-------------|-------------|
| C | 0.76502300  | 0.71677500  | -1.11976600 |
| C | -2.26515500 | 1.54962900  | -0.33966300 |
| C | -1.25040900 | -1.37290600 | -1.13560100 |
| C | 0.02345900  | -2.08880300 | -0.77246800 |
| C | 0.84134600  | -1.41665000 | 0.35742900  |
| C | 1.20292800  | 0.09818200  | 0.07776100  |
| H | 0.85230100  | 0.13506700  | -2.03893200 |
| H | 0.65728600  | -2.18776000 | -1.66393400 |
| H | 0.96780800  | 0.71090200  | 0.95066500  |
| C | -2.45772200 | -1.48249800 | -0.55463100 |
| H | -1.18559500 | -0.66934300 | -1.96990200 |
| C | -3.50411300 | 0.75707300  | -0.03822100 |
| H | -4.39107200 | 1.36377500  | -0.25799800 |
| H | -3.56164600 | 0.48514800  | 1.02032200  |
| C | -3.56161900 | -0.51715000 | -0.91788600 |
| H | -3.47926000 | -0.22087700 | -1.96989300 |
| H | -4.53856100 | -0.99373400 | -0.79240000 |
| C | -1.39489400 | 2.12626300  | 0.49975800  |
| H | -2.07273700 | 1.63562800  | -1.41037900 |
| C | -0.14910500 | 2.82355700  | -0.03551000 |
| C | 0.41943700  | 2.13805400  | -1.27952000 |
| H | -0.21093100 | 2.25827700  | -2.16630200 |
| H | 1.38249600  | 2.59792900  | -1.58873700 |
| C | 2.20059300  | -2.12555400 | 0.56298900  |
| H | 2.13190500  | -2.88892200 | 1.34298400  |
| H | 2.51475900  | -2.63378300 | -0.35495700 |
| C | 3.17627100  | -1.01338400 | 0.91988700  |
| H | 4.22859400  | -1.30177600 | 0.82281400  |
| H | 3.01987100  | -0.67718200 | 1.95178400  |
| C | 2.86164600  | 0.14690200  | -0.04244500 |
| C | 3.38708000  | 1.48302300  | 0.46118600  |
| H | 3.12318200  | 2.31873400  | -0.19572900 |
| H | 3.02829700  | 1.70175100  | 1.47100900  |
| C | 3.39141400  | -0.15127400 | -1.44967400 |
| H | 3.23632100  | 0.68516200  | -2.13984800 |
| H | 4.47092300  | -0.31522000 | -1.38387200 |
| H | 2.94930200  | -1.05016400 | -1.88860000 |
| H | -0.36189800 | 3.87162700  | -0.27406200 |
| H | 0.61655400  | 2.85068000  | 0.74877500  |
| C | -1.54510100 | 2.18122700  | 1.99498400  |
| H | -2.45755700 | 1.70068500  | 2.34819000  |
| H | -0.68899100 | 1.70813800  | 2.49391200  |
| H | -1.56671900 | 3.22409800  | 2.33193700  |
| C | -2.81193900 | -2.48645800 | 0.50752900  |
| H | -3.09580400 | -1.98565100 | 1.44161800  |
| H | -3.68404000 | -3.06352100 | 0.18290200  |
| H | -2.00624700 | -3.18642300 | 0.72827500  |
| C | 0.04805000  | -1.39970400 | 1.67032200  |
| H | -0.86014500 | -0.79489300 | 1.57358500  |
| H | -0.23825100 | -2.41629800 | 1.95352100  |
| H | 0.65442600  | -0.98551900 | 2.48309100  |
| H | -0.17857900 | -3.11511400 | -0.44396200 |
| H | 4.48086500  | 1.44074900  | 0.49537000  |

**TS\_11-12**Sum of electronic and thermal Free  
Energies = -781.11708

|   |             |             |             |
|---|-------------|-------------|-------------|
| C | 0.38472400  | 0.78323200  | -0.91008100 |
| C | -1.42476600 | 1.62740600  | -0.43734900 |
| C | -1.54125200 | -1.44059200 | -1.20027600 |
| C | -0.33968700 | -2.21212400 | -0.74756900 |
| C | 0.47941400  | -1.53170200 | 0.39798500  |
| C | 1.04835400  | -0.07188700 | 0.14386300  |
| H | 0.06446000  | 0.22113700  | -1.78023200 |
| H | 0.32301800  | -2.38972900 | -1.60168300 |
| H | 0.98630200  | 0.45569700  | 1.10679800  |
| C | -2.70893800 | -1.26012300 | -0.57339000 |
| H | -1.40431700 | -0.82702800 | -2.08893900 |

|   |             |             |             |
|---|-------------|-------------|-------------|
| C | -2.79599700 | 1.11290300  | -0.01147900 |
| H | -3.43973700 | 2.00526600  | -0.00963000 |
| H | -2.76134900 | 0.75806100  | 1.02428800  |
| C | -3.44307000 | 0.01966300  | -0.88602400 |
| H | -3.36171300 | 0.28517600  | -1.94629300 |
| H | -4.50759300 | -0.03951300 | -0.64018300 |
| C | -0.71039400 | 2.45544900  | 0.43308100  |
| H | -1.37853800 | 1.89947300  | -1.49294700 |
| C | 0.60244800  | 2.99529900  | -0.03107200 |
| C | 0.94287600  | 2.15802300  | -1.25226500 |
| H | 0.45558800  | 2.54199600  | -2.15240200 |
| H | 2.00935800  | 2.11481800  | -1.46619400 |
| C | 1.74140700  | -2.40421300 | 0.63843200  |
| H | 1.59567700  | -3.09014900 | 1.47800600  |
| H | 1.94989100  | -3.02243600 | -0.24089800 |
| C | 2.88178300  | -1.42561000 | 0.87170900  |
| H | 3.87094700  | -1.85897200 | 0.69255300  |
| H | 2.86960000  | -1.05995400 | 1.90707600  |
| C | 2.61082000  | -0.24230700 | -0.07701000 |
| C | 3.45663800  | 0.94545000  | 0.39401300  |
| H | 3.44696500  | 1.81019200  | -0.27360700 |
| H | 3.15538800  | 1.27223300  | 1.39586800  |
| C | 2.96474600  | -0.61824900 | -1.52198600 |
| H | 2.78299800  | 0.20249600  | -2.22380300 |
| H | 4.02828200  | -0.86727400 | -1.58767500 |
| H | 2.40034500  | -1.48683300 | -1.87265700 |
| H | 0.55266200  | 4.08100900  | -0.18036600 |
| H | 1.33842300  | 2.82912700  | 0.76834100  |
| C | -1.10504300 | 2.67366000  | 1.84537800  |
| H | -0.54258000 | 3.49497800  | 2.29278000  |
| H | -2.17867300 | 2.83292700  | 1.96527500  |
| H | -0.85143700 | 1.75740600  | 2.40464300  |
| C | -3.26491700 | -2.09897200 | 0.54166400  |
| H | -3.39756900 | -1.52922500 | 1.46964500  |
| H | -4.25770700 | -2.45770100 | 0.24806200  |
| H | -2.64455700 | -2.96915100 | 0.75881800  |
| C | -0.34041200 | -1.46946000 | 1.69320300  |
| H | -1.16528700 | -0.75294100 | 1.61321600  |
| H | -0.76164600 | -2.44601100 | 1.94660600  |
| H | 0.30044700  | -1.15968300 | 2.52674000  |
| H | -0.61155800 | -3.20564000 | -0.36874500 |
| H | 4.50151100  | 0.62517000  | 0.46258600  |

**IM12**Sum of electronic and thermal Free  
Energies = -781.12447

|   |             |             |             |
|---|-------------|-------------|-------------|
| C | 0.19200000  | 0.79237800  | -0.85422800 |
| C | -1.20575300 | 1.46624700  | -0.35333400 |
| C | -1.48922500 | -1.59516900 | -1.22353800 |
| C | -0.26031000 | -2.33887000 | -0.80903100 |
| C | 0.51590100  | -1.63479500 | 0.35294600  |
| C | 0.95885900  | -0.10360400 | 0.17082500  |
| H | 0.01442600  | 0.23402500  | -1.76781100 |
| H | 0.40819900  | -2.45373500 | -1.66904400 |
| H | 0.80185900  | 0.35010100  | 1.16410800  |
| C | -2.62877000 | -1.42908200 | -0.54510800 |
| H | -1.36815900 | -0.93500000 | -2.07870500 |
| C | -2.55219400 | 0.90533000  | 0.16639600  |
| H | -3.19542200 | 1.78081600  | 0.31731200  |
| H | -2.40619400 | 0.45844100  | 1.15685000  |
| C | -3.31035900 | -0.09767700 | -0.73266100 |
| H | -3.28011800 | 0.23346200  | -1.77752400 |
| H | -4.35960700 | -0.11488900 | -0.42105000 |
| C | -0.74783900 | 2.66313500  | 0.34665300  |
| H | -1.46963500 | 2.00422000  | -1.30472500 |
| C | 0.60106500  | 3.03971100  | -0.07214400 |
| C | 0.91119800  | 2.10678700  | -1.23651900 |
| H | 0.46290000  | 2.51012800  | -2.15280000 |
| H | 1.97227600  | 2.00077300  | -1.42056900 |
| C | 1.84369000  | -2.41336300 | 0.55010600  |
| H | 1.73854800  | -3.18289200 | 1.32066300  |
| C | 2.13281200  | -2.92814800 | -0.37170600 |
| H | 2.87338400  | -1.35672800 | 0.90484100  |
| H | 3.90682600  | -1.68484800 | 0.75541900  |

|   |             |             |             |
|---|-------------|-------------|-------------|
| H | 2.77530000  | -1.06144500 | 1.95840800  |
| C | 2.52561400  | -0.15276500 | 0.00860700  |
| C | 3.29231600  | 1.05472600  | 0.57005100  |
| H | 3.27795700  | 1.95184500  | -0.05354200 |
| H | 2.92753200  | 1.31545000  | 1.57167200  |
| C | 2.96468900  | -0.46039000 | -1.43296100 |
| H | 2.80989000  | 0.37273300  | -2.12309900 |
| H | 4.03376000  | -0.69508400 | -1.44990900 |
| H | 2.43250200  | -1.32259400 | -1.84412100 |
| H | 0.72724500  | 4.12008300  | -0.20329200 |
| H | 1.22996900  | 2.77242900  | 0.80335700  |
| C | -1.51107300 | 3.42508700  | 1.34096100  |
| H | -0.93232700 | 4.23483100  | 1.78397000  |
| H | -2.40383800 | 3.84316000  | 0.85210900  |
| H | -1.89961800 | 2.71674300  | 2.11161600  |
| C | -3.17401700 | -2.31795800 | 0.53572600  |
| H | -3.29399200 | -1.79610000 | 1.49317900  |
| H | -4.17208600 | -2.65744700 | 0.23578300  |
| H | -2.55492700 | -3.20064000 | 0.69997900  |
| C | -0.26775600 | -1.72976300 | 1.66982500  |
| H | -1.14338000 | -1.07727300 | 1.67908300  |
| H | -0.60363900 | -2.75341500 | 1.85854100  |
| H | 0.37607300  | -1.43384400 | 2.50563200  |
| H | -0.48068300 | -3.35457800 | -0.45656400 |
| H | 4.34703900  | 0.78258400  | 0.68229600  |

**TS\_12-13**

Sum of electronic and thermal Free  
Energies = -781.12089

|   |             |             |             |
|---|-------------|-------------|-------------|
| C | 0.08134700  | 0.79392000  | -0.80854300 |
| C | -1.26823900 | 1.32411400  | -0.17319900 |
| C | -1.31497600 | -1.76384900 | -1.23068700 |
| C | -0.05223100 | -2.40941900 | -0.76008900 |
| C | 0.64773800  | -1.61039600 | 0.39157600  |
| C | 0.96416200  | -0.05067800 | 0.18575000  |
| H | -0.10937700 | 0.22216900  | -1.70896200 |
| H | 0.64138300  | -2.51025100 | -1.60077900 |
| H | 0.80665200  | 0.39556600  | 1.18148500  |
| C | -2.47342800 | -1.63720900 | -0.57564100 |
| H | -1.21531900 | -1.14100200 | -2.11568700 |
| C | -2.62221800 | 0.68202000  | 0.16957700  |
| H | -3.33541900 | 1.50270200  | 0.28854500  |
| H | -2.52600000 | 0.22178900  | 1.15991100  |
| C | -3.22572200 | -0.35390800 | -0.81000900 |
| H | -3.12772200 | -0.00417900 | -1.84399900 |
| H | -4.29426700 | -0.43820400 | -0.58656800 |
| C | -0.98558100 | 2.61796000  | 0.35822400  |
| H | -1.57413100 | 2.23209200  | -0.93207900 |
| C | 0.36721200  | 3.08746600  | -0.06294700 |
| C | 0.70431900  | 2.14899700  | -1.21753400 |
| H | 0.20129400  | 2.50850800  | -2.12534000 |
| H | 1.76167100  | 2.10071600  | -1.44003000 |
| C | 2.03643600  | -2.26969900 | 0.61107100  |
| H | 2.00085200  | -3.00458300 | 1.42074200  |
| H | 2.35539600  | -2.80746800 | -0.28729100 |
| C | 2.98650900  | -1.12160700 | 0.89787700  |
| H | 4.03802400  | -1.37305600 | 0.72712300  |
| H | 2.89583700  | -0.79801800 | 1.94369800  |
| C | 2.52299700  | 0.02389800  | -0.02319900 |
| C | 3.21451000  | 1.29840600  | 0.48831100  |
| H | 3.13725200  | 2.17096000  | -0.16347300 |
| H | 2.84275200  | 1.56991900  | 1.48398500  |
| C | 2.94300300  | -0.28639200 | -1.46854200 |
| H | 2.66124100  | 0.49568900  | -2.17869800 |
| H | 4.03121900  | -0.39201200 | -1.52226200 |
| H | 2.50402400  | -1.22134000 | -1.82719300 |
| H | 0.39571700  | 4.15673000  | -0.28633700 |
| H | 1.03410800  | 2.90943000  | 0.79507400  |
| C | -1.84978600 | 3.46914900  | 1.21435800  |
| H | -1.95578000 | 4.46950200  | 0.78571000  |
| H | -2.82409900 | 3.04789900  | 1.44843900  |
| H | -1.29406700 | 3.59674000  | 2.15331500  |
| C | -2.98667900 | -2.52566900 | 0.52177400  |
| H | -3.16971700 | -1.98782800 | 1.46013300  |

|   |             |             |             |
|---|-------------|-------------|-------------|
| H | -3.94984500 | -2.94294600 | 0.20615100  |
| H | -2.31376800 | -3.35818300 | 0.72968200  |
| C | -0.13956300 | -1.74392500 | 1.70320900  |
| H | -1.06471100 | -1.16309800 | 1.69452400  |
| H | -0.39536300 | -2.78732600 | 1.90889700  |
| H | 0.47018800  | -1.38185500 | 2.53839700  |
| H | -0.21177500 | -3.42364400 | -0.37261800 |
| H | 4.28489500  | 1.09551100  | 0.59748700  |

**TM13**

Sum of electronic and thermal Free  
Energies = -781.13966

|   |             |             |             |
|---|-------------|-------------|-------------|
| C | 0.01006000  | 0.84672300  | -0.82239700 |
| C | -1.33613400 | 1.17200500  | -0.31005600 |
| C | -0.87364400 | -1.95583000 | -0.99056900 |
| C | 0.16952200  | -2.42014400 | -0.03318800 |
| C | 0.64020000  | -1.23508000 | 0.87755300  |
| C | 1.01814400  | 0.12023900  | 0.18775000  |
| H | -0.05671700 | 0.26425400  | -1.73889800 |
| H | 1.01872900  | -2.83306400 | -0.58266300 |
| H | 1.11100700  | 0.81509000  | 1.03245700  |
| C | -2.16102600 | -1.69436100 | -0.73273100 |
| H | -0.48802400 | -1.60136500 | -1.94513800 |
| C | -2.65904700 | 0.69851700  | -0.78064400 |
| H | -3.00794900 | 1.56073700  | -1.38202300 |
| H | -3.33660600 | 0.73130900  | 0.08786100  |
| C | -2.81058400 | -0.61685300 | -1.56170100 |
| H | -2.32631500 | -0.52870900 | -2.53933900 |
| H | -3.87903300 | -0.78071800 | -1.73496100 |
| C | -1.31802400 | 2.42850100  | 0.51585800  |
| H | -2.13485700 | 3.04622800  | 0.11400600  |
| C | 0.04164200  | 3.07508700  | 0.18905900  |
| C | 0.46891800  | 2.32571400  | -1.07794400 |
| H | -0.06849000 | 2.72010600  | -1.94870200 |
| H | 1.52944300  | 2.38143200  | -1.30610300 |
| C | 2.01816400  | -1.61512900 | 1.45195500  |
| H | 2.25475900  | -0.96839300 | 2.30672000  |
| H | 2.03863800  | -2.64970500 | 1.80897000  |
| C | 2.98637100  | -1.35203200 | 0.30027100  |
| H | 2.98292300  | -2.18887700 | -0.40494600 |
| H | 4.01849300  | -1.23673600 | 0.64179900  |
| C | 2.47685300  | -0.05527500 | -0.39647500 |
| C | 3.40065800  | 1.09377500  | 0.04481400  |
| H | 3.09932000  | 2.07813500  | -0.31999600 |
| H | 3.44927200  | 1.14634900  | 1.13854700  |
| C | 2.52222000  | -0.23407700 | -1.91717900 |
| H | 2.24472900  | 0.67104800  | -2.46732100 |
| H | 3.54022700  | -0.49615800 | -2.22071600 |
| H | 1.86810300  | -1.05127700 | -2.24410300 |
| H | -0.04678100 | 4.15112200  | 0.03199100  |
| H | 0.75408700  | 2.91934400  | 1.00475000  |
| C | -1.62229400 | 2.23327400  | 2.01532400  |
| H | -1.72476900 | 3.22095300  | 2.46899300  |
| H | -2.55073300 | 1.68114800  | 2.18312700  |
| H | -0.80307100 | 1.71039800  | 2.50925800  |
| C | -2.96509100 | -2.23357600 | 0.41684600  |
| H | -3.37579200 | -1.44048100 | 1.05533700  |
| H | -3.82166700 | -2.79021200 | 0.02040300  |
| H | -2.38831100 | -2.91026000 | 1.04814700  |
| C | -0.37601700 | -0.99847300 | 1.99155300  |
| H | -1.31840100 | -0.57670000 | 1.61651600  |
| H | -0.62598000 | -1.93198200 | 2.50493100  |
| H | 0.03067000  | -0.31005600 | 2.73878100  |
| H | -0.18770300 | -3.21145700 | 0.63475300  |
| H | 4.41546300  | 0.91046300  | -0.32103900 |

**TS\_13-14a**

Sum of electronic and thermal Free  
Energies = -781.13286

|   |             |            |             |
|---|-------------|------------|-------------|
| C | 0.08739000  | 1.08660900 | -0.71727200 |
| C | -1.38565000 | 0.94695200 | -0.56272300 |

|   |             |             |             |
|---|-------------|-------------|-------------|
| C | -0.49975700 | -1.87502700 | -0.79504600 |
| C | 0.54433400  | -2.20918000 | 0.21129600  |
| C | 0.90546100  | -0.93961900 | 1.03198800  |
| C | 1.17097400  | 0.35582700  | 0.21883500  |
| H | 0.34578700  | 0.84794200  | -1.75203500 |
| H | 1.43522800  | -2.60492400 | -0.28434200 |
| H | 1.35615400  | 1.08964100  | 1.01169700  |
| C | -1.82910300 | -1.86204000 | -0.63944000 |
| H | -0.12280400 | -1.45282700 | -1.72876900 |
| C | -2.36275700 | 0.41993700  | -1.58137800 |
| H | -1.96565300 | 0.80379400  | -2.53443700 |
| H | -3.31411500 | 0.93046200  | -1.41433900 |
| C | -2.61471700 | -1.11199600 | -1.69573500 |
| H | -2.33469100 | -1.45813100 | -2.69353400 |
| H | -3.68812100 | -1.28379500 | -1.58836100 |
| C | -1.92601500 | 1.93724300  | 0.40911100  |
| H | -2.47639400 | 2.58447500  | -0.30816500 |
| C | -0.71459600 | 2.74476100  | 0.87059400  |
| C | 0.19683700  | 2.61862000  | -0.35443400 |
| H | -0.18327900 | 3.23876200  | -1.17471200 |
| H | 1.23327700  | 2.89608900  | -0.17118800 |
| C | 2.30963900  | -1.12382100 | 1.63716800  |
| H | 2.45005300  | -0.40951700 | 2.45730800  |
| H | 2.43918700  | -2.12728000 | 2.05462700  |
| C | 3.28166800  | -0.82536300 | 0.48470300  |
| H | 3.53579000  | -1.74508000 | -0.05167100 |
| H | 4.22355300  | -0.40929900 | 0.85179300  |
| C | 2.56463400  | 0.16998000  | -0.48560800 |
| C | 3.34827700  | 1.48752000  | -0.56730200 |
| H | 2.90930800  | 2.18614500  | -1.28795000 |
| H | 3.41238600  | 1.98062500  | 0.40943600  |
| C | 2.51781500  | -0.42259500 | -1.90164900 |
| H | 2.08067400  | 0.26604100  | -2.63317800 |
| H | 3.54335700  | -0.61338500 | -2.23252100 |
| H | 1.98449800  | -1.37415500 | -1.95349700 |
| H | -0.97200500 | 3.77773600  | 1.11075100  |
| H | -0.26101200 | 2.29561100  | 1.75987500  |
| C | -2.96681900 | 1.46400800  | 1.43085900  |
| H | -3.46787800 | 2.33439900  | 1.85725300  |
| H | -3.72710600 | 0.82383700  | 0.97379000  |
| H | -2.48229700 | 0.91534200  | 2.24006400  |
| C | -2.60605800 | -2.46719400 | 0.49385000  |
| H | -3.21298700 | -1.71443200 | 1.01306100  |
| H | -3.30471400 | -3.21378100 | 0.09950100  |
| H | -1.96559600 | -2.95564800 | 1.22922200  |
| C | -0.15103900 | -0.71508000 | 2.10691400  |
| H | -1.14788200 | -0.59518600 | 1.66714000  |
| H | -0.20054200 | -1.57179100 | 2.78690100  |
| H | 0.07407700  | 0.17322000  | 2.70727000  |
| H | 0.21079400  | -2.97894900 | 0.91477400  |
| H | 4.36983500  | 1.28679900  | -0.90375200 |

#### IM14a

Sum of electronic and thermal Free  
Energies = -781.19549

|   |             |             |             |
|---|-------------|-------------|-------------|
| C | 0.25709000  | 0.94024700  | -1.21590800 |
| C | -1.03323600 | 0.14246600  | -0.81345200 |
| C | -0.90942300 | -0.52738100 | 0.46623600  |
| C | -0.15241700 | 0.04153600  | 1.57727200  |
| C | 1.25473300  | 0.66220900  | 1.20943800  |
| C | 1.49265200  | 0.63865000  | -0.33095900 |
| H | 0.50971200  | 0.64080400  | -2.23786900 |
| H | -0.08226500 | -0.66020900 | 2.41336200  |
| H | 2.17881300  | 1.46868000  | -0.53681600 |
| C | -1.59138000 | -1.83725400 | 0.48179600  |
| H | -0.69421100 | -2.49445200 | 0.42003200  |
| C | -1.61533700 | -0.92344200 | -1.77565400 |
| H | -0.81272800 | -1.40996800 | -2.33082100 |
| H | -2.28240900 | -0.47150200 | -2.51304400 |
| C | -2.33862800 | -1.92974300 | -0.86251700 |
| H | -2.32332100 | -2.94628600 | -1.26006000 |
| H | -3.38830100 | -1.65973900 | -0.71655600 |
| C | -2.16549500 | 1.30440500  | -0.57237100 |
| H | -2.59479400 | 1.37063800  | -1.57818200 |

|   |             |             |             |
|---|-------------|-------------|-------------|
| C | -1.36174400 | 2.56647700  | -0.31073000 |
| C | -0.14097100 | 2.444035200 | -1.21648200 |
| H | -0.42009400 | 2.74128200  | -2.23135000 |
| H | 0.68884400  | 3.08310400  | -0.91153300 |
| C | 2.34192400  | -0.28227700 | 1.75576600  |
| H | 3.29295300  | 0.26174600  | 1.78697700  |
| H | 2.13218500  | -0.61457700 | 2.77763300  |
| C | 2.41292300  | -1.40226200 | 0.73198400  |
| H | 1.56210200  | -2.08804100 | 0.86406300  |
| H | 3.31828800  | -2.01083800 | 0.81372000  |
| C | 2.31684500  | -0.68520200 | -0.63296000 |
| C | 3.72010300  | -0.26452100 | -1.10091900 |
| H | 3.65944200  | 0.30907300  | -2.03243900 |
| H | 4.22404700  | 0.36191300  | -0.35769900 |
| C | 1.74525600  | -1.64483300 | -1.67717200 |
| H | 1.61296400  | -1.17926700 | -2.65919000 |
| H | 2.43840200  | -2.48181600 | -1.80785700 |
| H | 0.79157800  | -2.07775300 | -1.36100100 |
| H | -1.96968800 | 3.45003700  | -0.53048800 |
| H | -1.09215400 | 2.63649500  | 0.74864900  |
| C | -3.30372300 | 1.07019800  | 0.41775600  |
| H | -3.97319000 | 1.93397200  | 0.37829200  |
| H | -3.90254700 | 0.18931800  | 0.17881500  |
| H | -2.95568700 | 0.98856500  | 1.45312300  |
| C | -2.36530500 | -2.22791000 | 1.74389000  |
| H | -2.74345800 | -3.24534100 | 1.62849200  |
| H | -1.74238900 | -2.20082300 | 2.64054500  |
| H | -3.22066300 | -1.56304800 | 1.88835600  |
| C | 1.40918000  | 2.04378900  | 1.85197600  |
| H | 0.70531000  | 2.78431200  | 1.46894500  |
| H | 1.27491500  | 1.97796200  | 2.93725700  |
| H | 2.41814300  | 2.42271900  | 1.66608100  |
| H | -0.79518300 | 0.87219400  | 1.92361100  |
| H | 4.34710200  | -1.14217300 | -1.28489800 |

#### TS\_11-15a

Sum of electronic and thermal Free  
Energies = -781.129668

|   |             |             |             |
|---|-------------|-------------|-------------|
| C | 0.63807419  | -0.64140182 | -0.85881165 |
| C | -2.66559292 | 0.20998893  | -1.86405373 |
| C | -0.87193472 | -1.62407680 | 0.60119875  |
| C | 0.22710169  | -1.54768346 | 1.64523785  |
| C | 1.06772568  | -0.24737019 | 1.61629582  |
| C | 1.25117488  | 0.23539292  | 0.13478737  |
| H | 0.98528468  | -1.67250577 | -0.84169173 |
| H | 0.89542112  | -2.39882401 | 1.47097307  |
| H | 0.86548752  | 1.25348015  | 0.02433417  |
| C | -2.14840434 | -1.12696803 | 0.73321192  |
| H | -0.80170325 | -2.43834668 | -0.12126091 |
| C | -3.79514972 | -0.26121711 | -1.00268990 |
| H | -4.65373535 | -0.58427824 | -1.59739657 |
| H | -4.14886544 | 0.50088868  | -0.30335289 |
| C | -3.23983420 | -1.49325794 | -0.23634138 |
| H | -2.87753352 | -2.23021892 | -0.96044474 |
| H | -4.04874510 | -1.96504912 | 0.33609366  |
| C | -1.80124585 | 1.20095383  | -1.62557677 |
| H | -2.41665838 | -0.49568402 | -2.65861322 |
| C | -0.46767411 | 1.17718044  | -2.35523191 |
| C | 0.20568024  | -0.19315470 | -2.20456721 |
| H | -0.36896153 | -0.98616734 | -2.69005404 |
| H | 1.17897860  | -0.20050058 | -2.74033132 |
| C | 2.50073629  | -0.44280249 | 2.16290686  |
| H | 2.55850616  | -0.21826224 | 3.23187869  |
| H | 2.83359151  | -1.47808407 | 2.03408076  |
| C | 3.35164350  | 0.49894683  | 1.31395399  |
| H | 4.42575320  | 0.29886008  | 1.38052118  |
| H | 3.19538163  | 1.53992656  | 1.62147565  |
| C | 2.83885215  | 0.30721355  | -0.12804933 |
| C | 3.17601570  | 1.49065216  | -1.03009340 |
| H | 2.77588766  | 1.36579082  | -2.04306340 |
| H | 2.78863205  | 2.42782009  | -0.61853093 |
| C | 3.43235737  | -0.97950966 | -0.72021108 |
| H | 3.11937308  | -1.14794481 | -1.75642221 |
| H | 4.52214942  | -0.88923233 | -0.72985420 |



|   |             |             |             |
|---|-------------|-------------|-------------|
| H | 3.18402683  | -1.87170914 | -0.13674199 |
| H | -0.59458628 | 1.37650346  | -3.42473258 |
| H | 0.19048749  | 1.96584268  | -1.97491095 |
| C | -2.00820008 | 2.32676315  | -0.65068410 |
| H | -2.99884811 | 2.31585130  | -0.19309604 |
| H | -1.25117188 | 2.32022246  | 0.14393291  |
| H | -1.90014099 | 3.28462646  | -1.17207429 |
| C | -2.60397947 | -0.28560636 | 1.88553113  |
| H | -2.68778200 | 0.76485949  | 1.58175426  |
| H | -3.60608965 | -0.59913748 | 2.19275211  |
| H | -1.93553054 | -0.33702785 | 2.74346424  |
| C | 0.40179363  | 0.89739355  | 2.39143907  |
| H | -0.52936114 | 1.22097327  | 1.92307919  |
| H | 0.18937235  | 0.59546399  | 3.42193201  |
| H | 1.06720839  | 1.76585981  | 2.42890618  |
| H | -0.17968676 | -1.69304944 | 2.65264897  |
| H | 4.26258071  | 1.58696892  | -1.12296831 |

**IM15a**

Sum of electronic and thermal Free  
Energies = -781.165108

|   |             |             |             |
|---|-------------|-------------|-------------|
| C | -0.63360200 | 2.26857273  | -1.27573821 |
| C | -0.02581972 | 4.79852882  | -3.27303536 |
| C | -0.53595576 | 3.75349067  | -0.83526270 |
| C | -0.26361746 | 3.64656097  | 0.69058666  |
| C | 0.40791623  | 2.26929786  | 0.95593438  |
| C | 0.35755738  | 1.48375059  | -0.39451792 |
| H | -1.63816406 | 1.97585720  | -0.94686522 |
| H | -1.22752030 | 3.69817121  | 1.20682799  |
| H | 1.35398318  | 1.49276752  | -0.86105309 |
| C | 0.46771900  | 4.66844362  | -1.53537142 |
| H | -1.51263883 | 4.22331386  | -1.00133736 |
| C | 0.15262640  | 6.29793322  | -3.11951851 |
| H | -0.64591462 | 6.88950183  | -3.56610388 |
| H | 1.11134768  | 6.66478414  | -3.48654979 |
| C | 0.11117142  | 6.17791912  | -1.58317664 |
| H | -0.89506016 | 6.34480773  | -1.19180761 |
| H | 0.82091003  | 6.80404881  | -1.03681955 |
| C | 0.91786005  | 3.86414172  | -3.68624250 |
| H | -1.05361725 | 4.44975355  | -3.20019161 |
| C | 0.65241595  | 2.39825146  | -3.54626149 |
| C | -0.60019849 | 1.96933481  | -2.78268311 |
| H | -1.49242143 | 2.38396118  | -3.26803457 |
| H | -0.68182334 | 0.88709507  | -2.91237591 |
| C | -0.40225174 | 1.36468719  | 1.90825621  |
| H | -0.20823426 | 1.58807725  | 2.96237036  |
| H | -1.47771097 | 1.50554379  | 1.73748283  |
| C | 0.00622571  | -0.04762880 | 1.49338107  |
| H | -0.66230383 | -0.81961872 | 1.88674808  |
| H | 1.01130859  | -0.28130807 | 1.86133348  |
| C | -0.01110651 | -0.01190065 | -0.05651450 |
| C | 1.02366402  | -0.96840724 | -0.65495682 |
| H | 0.99385191  | -0.95198442 | -1.75182290 |
| H | 2.03707254  | -0.69765085 | -0.33831527 |
| C | -1.41307231 | -0.45007951 | -0.51334877 |
| H | -1.56053498 | -0.37461548 | -1.59436571 |
| H | -1.55597476 | -1.50120271 | -0.24594618 |
| H | -2.20942367 | 0.11691706  | -0.02017216 |
| H | 0.61555289  | 2.00652646  | -4.57431105 |
| H | 1.55138222  | 1.93774806  | -3.11255804 |
| C | 2.23880206  | 4.23070461  | -4.26246229 |
| H | 2.45661425  | 5.29642758  | -4.24395004 |
| H | 3.05268433  | 3.67008990  | -3.79352822 |
| H | 2.20909107  | 3.91152705  | -5.31396971 |
| C | 1.94163994  | 4.47343462  | -1.24342878 |
| H | 2.08959214  | 4.74350341  | -0.19404881 |
| H | 2.28925020  | 3.44617105  | -1.37652122 |
| C | 2.56467276  | 5.15248417  | -1.83068066 |
| H | 1.83204204  | 2.40901687  | 1.51096299  |
| H | 2.50961196  | 2.90661136  | 0.81391181  |
| H | 1.82277050  | 2.98295310  | 2.44350240  |
| H | 2.26777797  | 1.43050148  | 1.72999612  |
| H | 0.32804052  | 4.48454322  | 1.07537858  |
| H | 0.83553709  | -1.99788953 | -0.33400344 |

**TS\_15a-15b**

Sum of electronic and thermal Free  
Energies = -781.157416

|   |             |             |             |
|---|-------------|-------------|-------------|
| C | -0.33071687 | 2.23716632  | -1.22000361 |
| C | -0.27947193 | 4.73171177  | -3.24078422 |
| C | -0.04781975 | 3.71151426  | -0.70643661 |
| C | 0.79026361  | 3.52308130  | 0.58295850  |
| C | 0.63771180  | 2.06142821  | 1.00793232  |
| C | 0.50087179  | 1.28739609  | -0.32425298 |
| H | -1.37733087 | 2.06886415  | -0.94901739 |
| H | 0.49977894  | 4.22445685  | -1.37346449 |
| H | 1.48611875  | 1.11495157  | -0.78807533 |
| C | 0.53769610  | 4.80138421  | -1.62529972 |
| H | -1.02831708 | 4.10922197  | -0.42526879 |
| C | -0.41546531 | 6.23837751  | -3.15561261 |
| H | -1.38683644 | 6.61903328  | -3.46891408 |
| H | 0.36671519  | 6.78091143  | -3.68676199 |
| C | -0.17947890 | 6.18432763  | -1.63501654 |
| H | -1.12313072 | 6.12709855  | -1.08843201 |
| H | 0.43479854  | 6.98524652  | -1.21581902 |
| C | 0.77971750  | 4.00143940  | -3.76768428 |
| H | -1.17550841 | 4.17840315  | -2.96815659 |
| C | 0.88490024  | 2.53223464  | -3.51776261 |
| C | -0.25020779 | 1.89846003  | -2.72197089 |
| H | -1.20059282 | 2.11188592  | -3.22537223 |
| H | -0.12788749 | 0.81701734  | -2.80155483 |
| C | -0.69006981 | 1.72496576  | 1.70905790  |
| H | -0.65023884 | 1.93875760  | 2.78188939  |
| H | -1.51058311 | 2.32583214  | 1.29633587  |
| C | -0.90356022 | 0.23268325  | 1.40336675  |
| H | -1.96619414 | -0.02364296 | 1.36206073  |
| H | -0.46731869 | -0.38577802 | 2.19681066  |
| C | -0.18607585 | -0.07251840 | 0.04462117  |
| C | 0.88871335  | -1.15748661 | 0.22057369  |
| H | 1.36174200  | -1.39220380 | -0.73957829 |
| H | 1.67589547  | -0.85435710 | 0.91486139  |
| C | -1.20273131 | -0.62005756 | -0.96957025 |
| H | -0.72893140 | -0.93692874 | -1.90428507 |
| H | -1.67844674 | -1.50858877 | -0.54301227 |
| H | -2.00422934 | 0.08815046  | -1.20461963 |
| H | 0.97933035  | 2.05489893  | -4.49919043 |
| H | 1.85744493  | 2.35321075  | -3.02898501 |
| C | 1.87048973  | 4.60000389  | -4.58298084 |
| H | 1.87480415  | 5.68775804  | -4.60282229 |
| H | 2.85283662  | 4.22138243  | -4.28642033 |
| H | 1.69691084  | 4.24973242  | -5.61047940 |
| C | 2.04230273  | 5.01250694  | -1.60455085 |
| H | 2.28277362  | 5.43533224  | -0.62464469 |
| H | 2.62604354  | 4.09519156  | -1.72285946 |
| H | 2.35997824  | 5.75040478  | -2.34383577 |
| C | 1.81974589  | 1.65436163  | 1.89230076  |
| H | 2.75173288  | 1.60854494  | 1.31762686  |
| H | 1.95142465  | 2.38848486  | 2.69461497  |
| H | 1.66522333  | 0.68359053  | 2.36827277  |
| H | 1.85284018  | 3.68470459  | 0.38357013  |
| H | 0.43926549  | -2.07869916 | 0.60523929  |

**IM15b**

Sum of electronic and thermal Free  
Energies = -781.156058

|   |             |            |             |
|---|-------------|------------|-------------|
| C | -0.23532676 | 2.18302949 | -1.30538528 |
| C | -0.26616132 | 4.61009767 | -3.31963699 |
| C | 0.06406339  | 3.63454793 | -0.72979323 |
| C | 1.06008561  | 3.40593423 | 0.42277551  |
| C | 0.78330815  | 1.99583124 | 0.94166504  |
| C | 0.46550543  | 1.19132259 | -0.33453340 |
| H | -1.31453074 | 2.05871105 | -1.19922594 |
| H | 0.98071220  | 4.17020235 | 1.20514172  |
| H | 1.39955716  | 0.85387907 | -0.81030155 |
| C | 0.42620563  | 4.82317649 | -1.64153271 |

|   |             |             |             |
|---|-------------|-------------|-------------|
| H | -0.88292413 | 3.94644528  | -0.27662760 |
| C | -0.64863806 | 6.07222212  | -3.25715366 |
| H | -1.62777276 | 6.30067132  | -3.67595436 |
| H | 0.09418241  | 6.73980014  | -3.69425336 |
| C | -0.57390013 | 6.01626949  | -1.72138800 |
| H | -1.53820815 | 5.73067920  | -1.29542545 |
| H | -0.20226720 | 6.91276269  | -1.21761031 |
| C | 0.94200116  | 4.04974159  | -3.70828217 |
| H | -1.08233599 | 3.92833135  | -3.09295034 |
| C | 1.23043628  | 2.61045669  | -3.41026466 |
| C | 0.08634882  | 1.83072087  | -2.77688830 |
| H | -0.80122663 | 1.91884029  | -3.41372314 |
| H | 0.35187093  | 0.77009815  | -2.80846933 |
| C | -0.51416095 | 1.81948867  | 1.75222043  |
| H | -0.39564997 | 2.10719979  | 2.80181024  |
| H | -1.31951770 | 2.43945380  | 1.33533322  |
| C | -0.84844008 | 0.33138244  | 1.56675358  |
| H | -1.91244470 | 0.12401460  | 1.71425951  |
| H | -0.30858749 | -0.26988365 | 2.30581737  |
| C | -0.38279556 | -0.04705821 | 0.12398695  |
| C | 0.50701735  | -1.29793803 | 0.14247953  |
| H | 0.77940240  | -1.59773912 | -0.87620234 |
| H | 1.43253119  | -1.12827018 | 0.70105054  |
| C | -1.60368192 | -0.35494537 | -0.75622645 |
| H | -1.33547578 | -0.47883050 | -1.81164476 |
| H | -2.05726462 | -1.29416890 | -0.42496517 |
| H | -2.38021759 | 0.41319609  | -0.68319211 |
| H | 1.54333370  | 2.14923749  | -4.35635000 |
| H | 2.13013779  | 2.58173464  | -2.77353157 |
| C | 2.00633619  | 4.79791861  | -4.43132080 |
| H | 1.85061860  | 5.87395045  | -4.47367929 |
| H | 3.00142320  | 4.57389118  | -4.03694484 |
| H | 1.98434332  | 4.41827336  | -5.46237502 |
| C | 1.83817068  | 5.37129608  | -1.52206316 |
| H | 1.92917787  | 5.74240158  | -0.49553022 |
| H | 2.62824752  | 4.63276989  | -1.67331911 |
| H | 2.00303987  | 6.22252245  | -2.18584549 |
| C | 1.98678268  | 1.48257224  | 1.73627671  |
| H | 2.87188170  | 1.39429529  | 1.09645992  |
| H | 2.22409973  | 2.17701530  | 2.54934021  |
| H | 1.80019724  | 0.50555895  | 2.18740509  |
| H | 2.09179861  | 3.42247502  | 0.05091454  |
| H | -0.01887006 | -2.13679167 | 0.60944754  |

**TS\_15b-15c**

Sum of electronic and thermal Free  
Energies = -781.154202

|   |             |             |             |
|---|-------------|-------------|-------------|
| C | -0.07860769 | -0.09234706 | -0.01981466 |
| C | 0.65702059  | -1.76191434 | 2.51613425  |
| C | -0.04714563 | 0.70693434  | 1.34678165  |
| C | -1.21110654 | 1.70547837  | 1.24899599  |
| C | -1.27194141 | 2.09546268  | -0.22752465 |
| C | -0.94535405 | 0.78542873  | -0.97849539 |
| H | 0.95132379  | -0.11422278 | -0.37938639 |
| H | -1.08309032 | 2.57411258  | 1.90518367  |
| H | -1.87967075 | 0.23802527  | -1.16529890 |
| C | 0.09124907  | -0.01384039 | 2.69827492  |
| H | 0.87364927  | 1.30042523  | 1.29219234  |
| C | 1.52895196  | -1.50663661 | 3.72238569  |
| H | 2.51424393  | -1.96791265 | 3.67304623  |
| H | 1.05546214  | -1.76170034 | 4.67083012  |
| C | 1.47663231  | -0.00042237 | 3.41268719  |
| H | 2.26337018  | 0.27628620  | 2.70670110  |
| H | 1.49686090  | 0.67846278  | 4.27006799  |
| C | -0.68407932 | -2.10193790 | 2.45959697  |
| H | 1.19040629  | -1.68085801 | 1.57279829  |
| C | -1.42256946 | -1.98869068 | 1.15815328  |
| C | -0.57030760 | -1.56437608 | -0.03234665 |
| H | 0.26977154  | -2.26142138 | -0.12879294 |
| H | -1.16238795 | -1.71447916 | -0.93908753 |
| H | -0.15357241 | 3.03864604  | -0.71021492 |
| C | -0.36867855 | 4.08984373  | -0.49248048 |
| H | 0.80008213  | 2.79488930  | -0.22284974 |
| C | -0.05802475 | 2.73617398  | -2.21040536 |

|   |             |             |             |
|---|-------------|-------------|-------------|
| H | 0.90773707  | 3.02638800  | -2.63499998 |
| H | -0.82191265 | 3.29955543  | -2.75661931 |
| C | -0.31238261 | 1.20463186  | -2.35579376 |
| C | -1.30896067 | 0.92151348  | -3.48766877 |
| H | -1.44905492 | -0.15674182 | -3.62722073 |
| H | -2.28806764 | 1.36436727  | -3.27767686 |
| C | 1.00294915  | 0.48874488  | -2.68917988 |
| H | 0.89765511  | -0.60241532 | -2.65129486 |
| H | 1.31245694  | 0.75385569  | -3.70468701 |
| H | 1.81853533  | 0.78328176  | -2.01932032 |
| H | -1.89149628 | -2.96431721 | 0.97501682  |
| H | -2.26415432 | -1.29463894 | 1.31426901  |
| C | -1.45572492 | -2.62799155 | 3.62006431  |
| H | -0.94363076 | -2.53662849 | 4.57611831  |
| H | -2.45404113 | -2.18649441 | 3.68168594  |
| H | -1.59648653 | -3.69895949 | 3.42013389  |
| C | -0.98926697 | 0.28497854  | 3.72279310  |
| H | -0.90833762 | 1.35794001  | 3.92939347  |
| H | -2.00699074 | 0.09568623  | 3.3777503   |
| H | -0.81998406 | -0.23639157 | 4.66690000  |
| C | -2.64625583 | 2.67434165  | -0.57281326 |
| H | -3.43811302 | 1.94182461  | -0.38141980 |
| H | -2.84945961 | 3.56137844  | 0.03652284  |
| H | -2.71592135 | 2.97348571  | -1.62147882 |
| H | -2.16176205 | 1.22590302  | 1.51735455  |
| H | -0.94735272 | 1.33849606  | -4.43305285 |

**IM15c**

Sum of electronic and thermal Free  
Energies = -781.161237

|   |             |              |             |
|---|-------------|--------------|-------------|
| C | -0.45091221 | -0.29837471  | -0.09438743 |
| C | 0.41728858  | -1.97891418  | 2.23394450  |
| C | -0.12349692 | 0.59045209   | 1.13278888  |
| C | -1.30425424 | 1.57561770   | 1.17916916  |
| C | -1.56765743 | 1.91664069   | -0.30477446 |
| C | -0.93259979 | 0.74064676   | -1.12966390 |
| H | 0.45817387  | -0.79109292  | -0.45623285 |
| H | -1.08674834 | 2.47236716   | 1.76897425  |
| H | -1.70312256 | 0.28152898   | -1.76036699 |
| C | 0.32278838  | -0.09328773  | 2.42047780  |
| H | 0.76101335  | 1.17966165   | 0.85111907  |
| C | 1.67626751  | -1.87670503  | 3.05629736  |
| H | 2.47017295  | -2.55570948  | 2.74887808  |
| H | 1.51062710  | -1.96905449  | 4.13019771  |
| C | 1.83473421  | -0.41505250  | 2.60123917  |
| H | 2.34797306  | -0.36283012  | 1.63689637  |
| H | 2.31601038  | 0.26637074   | 3.30918410  |
| C | -0.90121603 | -1.92081399  | 2.63493985  |
| H | 0.60121131  | -2.05905945  | 1.16660145  |
| C | -1.97388062 | -1.68308810  | 1.61195190  |
| C | -1.53206028 | -1.39406982  | 0.16861140  |
| H | -1.19443696 | -2.33173931  | -0.28737197 |
| H | -2.44548840 | -1.12762027  | -0.37043025 |
| C | -0.80870785 | 3.17190659   | -0.79411020 |
| H | -1.43115677 | 4.07053792   | -0.74064820 |
| H | 0.07488829  | 3.35790827   | -0.16962230 |
| C | -0.37860287 | 2.81549052   | -2.21812702 |
| H | 0.38347211  | 3.48739740   | -2.62581018 |
| H | -1.24457802 | 2.85804235   | -2.89118678 |
| C | 0.12020459  | 1.35956002   | -2.10874709 |
| C | 0.08615908  | 0.62985976   | -3.45434488 |
| H | 0.40655445  | -0.41357135  | -3.34627687 |
| H | -0.92353816 | 0.63180102   | -3.87738208 |
| C | 1.57559258  | 1.36523858   | -1.60948868 |
| H | 1.94145901  | 0.36109882   | -1.37135790 |
| H | 2.21921628  | 1.75408698   | -2.40435098 |
| H | 1.73179350  | 2.00831091   | -0.73842105 |
| H | -2.61636370 | -2.57402398  | 1.61705991  |
| H | -2.61535047 | -0.88217393  | 2.00141534  |
| C | -1.35772486 | -2.18395926  | 4.03172189  |
| H | -0.54987475 | -2.22551407  | 4.76054487  |
| H | -2.11905146 | -1.47025857  | 4.35660132  |
| H | -1.83767055 | -3.117088748 | 4.01112348  |
| C | -0.22942099 | 0.51386644   | 3.69190859  |

|   |             |            |             |
|---|-------------|------------|-------------|
| H | 0.18185814  | 1.53116969 | 3.71622354  |
| H | -1.31697683 | 0.60217851 | 3.70692355  |
| H | 0.11718312  | 0.00479228 | 4.59338522  |
| C | -3.06740691 | 2.06725584 | -0.57111854 |
| H | -3.60355469 | 1.13381618 | -0.36208939 |
| H | -3.49718277 | 2.85320052 | 0.05892503  |
| H | -3.25714946 | 2.33264852 | -1.61600779 |
| H | -2.19516234 | 1.11086957 | 1.61616125  |
| H | 0.75537299  | 1.10893702 | -4.17582808 |

|   |             |             |              |
|---|-------------|-------------|--------------|
| C | -2.44197493 | -0.14874780 | -0.41857351  |
| C | -0.92321346 | -0.33419804 | 0.25053123   |
| C | -0.35389535 | 0.86649674  | 1.04078529   |
| C | 1.17596530  | 0.79127194  | 0.86236975   |
| C | 1.34544505  | 0.34667262  | -0.60628716  |
| H | 0.32246111  | -1.56201652 | -1.04260055  |
| H | -0.67681534 | 0.90716775  | 2.08314540   |
| H | 1.33747960  | 1.23041807  | -1.26066560  |
| C | -1.24663339 | -1.59766118 | 1.16822694   |
| H | -0.61107448 | -2.41855475 | 0.81686423   |
| C | -3.40907174 | -0.61392416 | 0.64110545   |
| H | -4.43124457 | -0.71650134 | 0.26749217   |
| H | -3.42019761 | 0.05444536  | 1.51020152   |
| C | -2.74402369 | -1.95356826 | 0.98204841   |
| H | -2.89242257 | -2.64899365 | 0.14889636   |
| H | -3.15848688 | -2.42296324 | 1.87610547   |
| C | -2.32130984 | 1.14039864  | -0.99759815  |
| H | -2.38907745 | -0.90656642 | -1.20810027  |
| C | -1.34201553 | 1.24795964  | -2.10282838  |
| C | -0.51472813 | -0.02700481 | -2.28950629  |
| H | -1.12997556 | -0.80646736 | -2.75034907  |
| H | 0.29628257  | 0.17114613  | -2.99534455  |
| C | 1.94342017  | -0.33021633 | 1.59376805   |
| H | 2.12857507  | -0.11185327 | 2.65095444   |
| H | 1.38856525  | -1.27414927 | 1.53700449   |
| C | 3.21885996  | -0.48437489 | 0.76029975   |
| H | 3.71493960  | -1.44304939 | 0.93854317   |
| H | 3.94382853  | 0.29654203  | 1.01074514   |
| C | 2.75161707  | -0.34536065 | -0.71796204  |
| C | 3.70791840  | 0.55037086  | -1.51495473  |
| H | 3.40737615  | 0.60989738  | -2.56747721  |
| H | 3.73017563  | 1.56824325  | -1.111119246 |
| C | 2.71595867  | -1.72726105 | -1.38264780  |
| H | 2.24646943  | -1.69552728 | -2.37310574  |
| H | 3.73869222  | -2.09241018 | -1.51549121  |
| H | 2.18722806  | -2.46805428 | -0.77225764  |
| H | -1.91504956 | 1.50309272  | -3.01013062  |
| H | -0.72318179 | 2.13855166  | -1.91529282  |
| C | 3.04269170  | 2.31731187  | -0.49058371  |
| H | -3.11574885 | 2.28812472  | 0.60178185   |
| H | -2.62620409 | 3.26441367  | -0.83478474  |
| H | -4.07914392 | 2.22813823  | -0.85437829  |
| C | -1.02389409 | -1.40640701 | 2.67616839   |
| H | -1.13912939 | -2.37961360 | 3.16076573   |
| H | -0.04381240 | -1.01911043 | 2.94673102   |
| H | -1.78124759 | -0.74090384 | 3.10542724   |
| C | 1.79094389  | 2.15770327  | 1.17792253   |
| H | 1.37248623  | 2.93396780  | 0.52686610   |
| H | 1.58533309  | 2.43952239  | 2.21606287   |
| H | 2.87454809  | 2.16552908  | 1.04379059   |
| H | -0.65139305 | 1.82413152  | 0.59304894   |
| H | 4.72715627  | 0.15297598  | -1.47926001  |

**TS\_15c-16**

Sum of electronic and thermal Free Energies = -781.14541

|   |             |             |             |
|---|-------------|-------------|-------------|
| C | 0.17009800  | -0.01401900 | -0.89630600 |
| C | -2.88639600 | -0.44602600 | -1.24816200 |
| C | -0.34517300 | -0.17186100 | 0.55080400  |
| C | 0.26859100  | 0.98484600  | 1.33416400  |
| C | 1.68664000  | 1.12958700  | 0.72206400  |
| C | 1.65252500  | 0.33594800  | -0.63647000 |
| H | 0.07380300  | -0.95482800 | -1.44520300 |
| H | 0.30615100  | 0.81469500  | 2.41360300  |
| H | 2.00942700  | 0.98566700  | -1.44264700 |
| C | -1.44576200 | -0.95416000 | 1.00922800  |
| H | 0.18062300  | -1.13625200 | 0.95933500  |
| C | -3.32666900 | -1.64633400 | -0.46358000 |
| H | -3.68712500 | -2.47143500 | -1.08183200 |
| H | -4.09847000 | -1.41977800 | 0.27570700  |
| C | -2.01550500 | -2.11784300 | 0.24823000  |
| H | -1.30876100 | -2.46201300 | -0.51178000 |
| H | -2.22480500 | -2.93780000 | 0.94375900  |
| C | -2.88228500 | 0.81294600  | -0.79501600 |
| H | -2.23218300 | -0.68924300 | -2.08464500 |
| C | -1.83645100 | 1.77936500  | -1.30296700 |
| C | -0.51367300 | 1.12573800  | -1.74665000 |
| H | -0.63930100 | 0.71239600  | -2.75233400 |
| H | 0.21017000  | 1.93686900  | -1.86137700 |
| C | 2.77765700  | 0.40820600  | 1.55158100  |
| H | 3.31415200  | 1.10113200  | 2.20658100  |
| H | 2.33134700  | -0.35658400 | 2.20168400  |
| C | 3.67585500  | -0.25558400 | 0.50531700  |
| H | 4.33840100  | -1.02081000 | 0.92216100  |
| H | 4.31062800  | 0.49983700  | 0.02499200  |
| C | 2.68791700  | -0.82813100 | -0.53067700 |
| C | 3.34260600  | -1.08115500 | -1.89096200 |
| H | 2.61021200  | -1.44455000 | -2.62180700 |
| H | 3.78890000  | -0.16398600 | -2.28750600 |
| C | 2.13480500  | -2.16989800 | -0.01651300 |
| H | 1.29832600  | -2.53962100 | -0.62189100 |
| H | 2.92180500  | -2.92756600 | -0.07799800 |
| H | 1.83058500  | -2.14305900 | 1.03727700  |
| H | -2.21635700 | 2.38474300  | -2.13548500 |
| H | -1.63921200 | 2.50111700  | -0.50009900 |
| C | -3.76523500 | 1.33901600  | 0.30566200  |
| H | -4.52768000 | 0.62902800  | 0.63056700  |
| H | -3.17685600 | 1.65551600  | 1.17678500  |
| H | -4.28455000 | 2.23609400  | -0.04944300 |
| C | -1.98508800 | -0.75792200 | 2.38270400  |
| H | -1.46683700 | -1.44997900 | 3.06172200  |
| H | -1.86389500 | 0.25760400  | 2.75539300  |
| H | -3.03881900 | -1.05085600 | 2.40271300  |
| C | 2.04762500  | 2.60376500  | 0.52928100  |
| H | 1.35373900  | 3.09900200  | -0.15908400 |
| H | 2.01745600  | 3.13893900  | 1.48408200  |
| H | 3.05708000  | 2.70564100  | 0.11881200  |
| H | -0.33341200 | 1.88492100  | 1.15811600  |
| H | 4.13296100  | -1.83375300 | -1.81055600 |

**TS\_16-17**

Sum of electronic and thermal Free Energies = -781.182487

|   |             |             |             |
|---|-------------|-------------|-------------|
| C | -0.17528800 | -0.34123100 | -0.97217300 |
| C | 2.35922200  | -0.48874100 | -0.38756600 |
| C | 0.98237800  | 0.39334700  | -0.21146400 |
| C | 0.48079300  | 0.49527800  | 1.25076500  |
| C | -1.05778100 | 0.42186300  | 1.20005100  |
| C | -1.35613900 | -0.52697900 | 0.02229000  |
| H | -0.47259500 | 0.27530800  | -1.82369400 |
| H | 0.84343400  | 1.38168200  | 1.77576700  |
| H | -1.34983200 | -1.56843800 | 0.37394900  |
| C | 1.53813800  | 1.76267000  | -0.80266600 |
| H | 1.09019700  | 1.88221900  | -1.79581400 |
| C | 3.46992600  | 0.46327300  | -0.01608700 |
| H | 4.46926900  | 0.06625000  | -0.21382900 |
| H | 3.41136400  | 0.75287200  | 1.04044900  |
| C | 3.08530800  | 1.63135500  | -0.93323400 |
| H | 3.37594700  | 1.38707900  | -1.96032600 |
| H | 3.59080700  | 2.56133100  | -0.66702000 |
| C | 2.07793400  | -1.75685600 | 0.19817200  |

**IM16**

Sum of electronic and thermal Free Energies = -781.182053

|   |            |             |             |
|---|------------|-------------|-------------|
| C | 0.08238511 | -0.50131125 | -0.93878675 |
|---|------------|-------------|-------------|

|   |             |             |             |
|---|-------------|-------------|-------------|
| H | 2.35605600  | -0.63045300 | -1.47845200 |
| C | 1.00349300  | -2.52567600 | -0.45865500 |
| C | 0.24974200  | -1.72324400 | -1.52406500 |
| H | 0.86413200  | -1.62275700 | -2.42520400 |
| H | -0.64007200 | -2.28310600 | -1.82544800 |
| C | -1.81413800 | 1.68461000  | 0.74069700  |
| H | -1.89302800 | 2.45314900  | 1.51702300  |
| H | -1.30983000 | 2.12879000  | -0.12527900 |
| C | -3.15937700 | 1.13472600  | 0.25885800  |
| H | -3.68423700 | 1.83859200  | -0.39380000 |
| H | -3.82457800 | 0.93304800  | 1.10437000  |
| C | -2.80300300 | -0.18455200 | -0.48815500 |
| C | -3.76769100 | -1.31325000 | -0.10433200 |
| H | -3.54972200 | -2.22708600 | -0.66956800 |
| H | -3.70005400 | -1.55098500 | 0.96265800  |
| C | -2.89769900 | 0.03778300  | -2.00350600 |
| H | -2.49794500 | -0.80979000 | -2.57262200 |
| H | -3.94791700 | 0.15525400  | -2.28691700 |
| H | -2.37631000 | 0.94616000  | -2.32404000 |
| H | 1.48621400  | -3.42300000 | -0.88673100 |
| H | 0.35058400  | -2.93209500 | 0.32728900  |
| C | 2.76643200  | -2.25586600 | 1.39508900  |
| H | 2.90454500  | -1.44689200 | 2.12206200  |
| H | 2.28684800  | -3.12293700 | 1.84924500  |
| H | 3.78709600  | -2.52808100 | 1.07996400  |
| C | 1.25992800  | 3.02905300  | 0.01861200  |
| H | 1.87036600  | 3.04842000  | 0.92784500  |
| H | 1.55554400  | 3.89353300  | -0.58210300 |
| H | 0.22023900  | 3.16818300  | 0.30638400  |
| C | -1.58830700 | -0.06508800 | 2.55139100  |
| H | -1.18860400 | -1.05736100 | 2.79166100  |
| H | -1.28822400 | 0.62210600  | 3.34972600  |
| H | -2.67766200 | -0.13540600 | 2.57083400  |
| H | 0.81646300  | -0.36484900 | 1.84643300  |
| H | -4.80171200 | -1.02560400 | -0.31894900 |

#### IM17

Sum of electronic and thermal Free  
Energies = -781.192722

|   |             |             |             |
|---|-------------|-------------|-------------|
| C | -0.14731334 | -0.22867175 | -1.01067082 |
| C | 2.44009154  | -0.55462049 | -0.36208805 |
| C | 1.03995863  | 0.42493612  | -0.27678271 |
| C | 0.59092625  | 0.72382700  | 1.17048012  |
| C | -0.92144405 | 0.43120468  | 1.24592334  |
| C | -1.23942756 | -0.50352781 | 0.05290025  |
| H | -0.50522892 | 0.49209485  | -1.75298645 |
| H | 0.81268641  | 1.75935054  | 1.44806632  |
| H | -1.15411260 | -1.55256315 | 0.37382809  |
| C | 1.75164451  | 1.62519769  | -0.96521936 |
| H | 1.92930650  | 1.32370293  | -2.00667076 |
| C | 3.48977586  | 0.34033395  | 0.26745821  |
| H | 4.49102047  | 0.03454061  | -0.04482376 |
| H | 3.45767127  | 0.29449914  | 1.35909233  |
| C | 3.10669260  | 1.75916610  | -0.23819432 |
| H | 3.86446579  | 2.17677641  | -0.90474491 |
| H | 3.01185436  | 2.44920978  | 0.60596246  |
| C | 1.88649658  | -1.75545173 | 0.13403530  |
| H | 2.55773909  | -0.61191610 | -1.44650642 |
| C | 0.99126511  | -2.48023784 | -0.80457961 |
| C | 0.26516197  | -1.50581138 | -1.76384956 |
| H | 0.90517596  | -1.25955359 | -2.61689773 |
| H | -0.61371219 | -2.01085921 | -2.17355083 |
| C | -1.81991991 | 1.64476950  | 0.94247286  |
| H | -1.92145219 | 2.31734773  | 1.80074902  |
| H | -1.39473476 | 2.22900402  | 0.11733235  |
| C | -3.13896267 | 1.01029831  | 0.49609395  |
| H | -3.76697447 | 1.70317001  | -0.07159672 |
| H | -3.72482111 | 0.69626573  | 1.36622302  |
| C | -2.73296012 | -0.22511861 | -0.36033759 |
| C | -3.60318492 | -1.44101232 | -0.02182521 |
| H | -3.35049085 | -2.29700840 | -0.65880387 |
| H | -3.47264697 | -1.74509973 | 1.02247880  |
| C | -2.92069220 | 0.10783130  | -1.84723178 |
| H | -2.50979324 | -0.66608287 | -2.50523156 |

|   |             |             |             |
|---|-------------|-------------|-------------|
| H | -3.98981904 | 0.18632031  | -2.06547127 |
| H | -2.46884066 | 1.06842050  | -2.11838555 |
| H | 1.64219831  | -3.14663672 | -1.39445148 |
| H | 0.30620788  | -3.13056671 | -0.25440024 |
| C | 2.04486173  | -2.25232224 | 1.51194380  |
| H | 1.06141265  | -2.29910893 | 1.99912260  |
| H | 2.38589658  | -3.29579841 | 1.45034553  |
| H | 2.74500614  | -1.67688225 | 2.11473237  |
| C | 0.95444318  | 2.92476833  | -1.00505900 |
| H | 0.72525861  | 3.30632399  | -0.00657049 |
| H | 1.55079981  | 3.68538815  | -1.51755520 |
| H | 0.01914461  | 2.81271234  | -1.56128086 |
| C | -1.28698343 | -0.17233746 | 2.60495255  |
| H | -0.75883675 | -1.11801634 | 2.77447995  |
| H | -1.01617941 | 0.51310453  | 3.41486369  |
| H | -2.35649678 | -0.37873551 | 2.68937396  |
| H | 1.12694259  | 0.10846635  | 1.90086614  |
| H | -4.66260227 | -1.21205826 | -0.17388873 |

#### TS\_17-18a

Sum of electronic and thermal Free  
Energies = -781.192127

|   |             |             |              |
|---|-------------|-------------|--------------|
| C | -0.13603171 | -0.39259913 | -0.909992341 |
| C | 2.30215960  | -0.21047879 | -0.04222923  |
| C | 0.94410658  | 0.48475907  | -0.21333091  |
| C | 0.39048152  | 0.79639251  | 1.21199055   |
| C | -1.09610226 | 0.39823391  | 1.24707130   |
| C | -1.29865764 | -0.61313096 | 0.09228011   |
| H | -0.48599712 | 0.15197421  | -1.79056515  |
| H | 0.53828144  | 1.84642285  | 1.48866824   |
| H | -1.21488468 | -1.63493014 | 0.49057131   |
| C | 1.43582976  | 1.73864112  | -0.98593979  |
| H | 1.72011383  | 1.38115233  | -1.98951812  |
| C | 3.31306260  | 0.85140142  | 0.37902233   |
| H | 4.32199078  | 0.63530090  | 0.01949317   |
| H | 3.35731926  | 0.90186497  | 1.47159816   |
| C | 2.72259660  | 2.14970695  | -0.23305806  |
| H | 3.43194418  | 2.64728577  | -0.89767783  |
| H | 2.47549833  | 2.86108195  | 0.56055196   |
| C | 2.40405111  | -1.61305635 | 0.14984244   |
| H | 2.63365759  | -0.57844747 | -1.10404667  |
| C | 1.25721808  | -2.44048546 | -0.30427714  |
| C | 0.42740905  | -1.73920569 | -1.39195880  |
| H | 1.05967844  | -1.61257217 | -2.28176875  |
| H | -0.39458819 | -2.39793571 | -1.68636118  |
| C | -2.08208114 | 1.52153317  | 0.87677858   |
| H | -2.27503786 | 2.20266545  | 1.71246273   |
| H | -1.68006168 | 2.11854249  | 0.05182282   |
| C | -3.32197302 | 0.76668942  | 0.39598386   |
| H | -3.99360949 | 1.39380670  | -0.19815918  |
| H | -3.90344430 | 0.40230962  | 1.24952404   |
| C | -2.77253962 | -0.42795418 | -0.43411397  |
| C | -3.58952578 | -1.69852687 | -0.17203578  |
| H | -3.22993672 | -2.53460023 | -0.78382732  |
| H | -3.52857822 | -1.99713924 | 0.88034765   |
| C | -2.86426825 | -0.09121780 | -1.92797747  |
| H | -2.37392406 | -0.84579310 | -2.55427391  |
| H | -3.91638281 | -0.05290057 | -2.22525065  |
| H | -2.42774359 | 0.88713974  | -2.15987334  |
| H | 1.59564474  | -3.43702863 | -0.60048003  |
| H | 0.64036411  | -2.58069188 | 0.60246915   |
| C | 3.61992091  | -2.24880766 | 0.69853178   |
| H | 4.48702138  | -1.58788613 | 0.69772003   |
| H | 3.37490458  | -2.45673530 | 1.75353633   |
| H | 3.84397985  | -3.20643889 | 0.22608321   |
| C | 0.46473971  | 2.89369626  | -1.17178450  |
| H | 0.15374981  | 3.31881252  | -0.21285231  |
| H | 0.94860772  | 3.69095973  | -1.74304741  |
| H | -0.42925993 | 2.59010563  | -1.72518912  |
| C | -1.45237936 | -0.19187048 | 2.61565298   |
| H | -0.83758638 | -1.07396403 | 2.83184585   |
| H | -1.28027754 | 0.54191358  | 3.41017917   |
| H | -2.49971462 | -0.50002913 | 2.66886055   |
| H | 0.93564701  | 0.20538793  | 1.96208890   |

H -4.64448962 -1.53671323 -0.41388120

**IM18a**

Sum of electronic and thermal Free  
Energies = -781.202928

-----  
C -0.18395100 -0.12422200 -1.15817300  
C 2.15764100 -0.10264700 -0.11449300  
C 0.92694200 0.58653200 -0.35979600  
C 0.62210100 0.28520600 1.22650000  
C -0.85082200 -0.19934300 1.26127800  
C -1.27473300 -0.62145900 -0.17118400  
H -0.58424700 0.60467100 -1.86733000  
H 0.81564000 1.20556800 1.78207700  
H -1.28373300 -1.71557000 -0.22374100  
C 1.31634000 2.05610600 -0.63999500  
H 1.56044600 2.07013700 -1.71277000  
C 3.24966600 0.85442400 0.25369800  
H 4.03157500 0.71068900 -0.50553700  
H 3.71802100 0.61462500 1.21402600  
C 2.61369200 2.25233300 0.16971500  
H 3.27996500 2.98034300 -0.29606200  
H 2.37966400 2.63109700 1.16943400  
C 2.41230300 -1.53522400 -0.41762500  
H 3.16014900 -1.41867700 -1.22570400  
C 1.19619000 -2.24219700 -1.02046400  
C 0.41303300 -1.30635100 -1.94481100  
H 1.07708500 -0.93696300 -2.73812400  
C -0.39741600 -1.85067700 -2.43899100  
H -1.82354300 0.94898200 1.59497400  
H -1.86688800 1.16129000 2.66819000  
H -1.51240000 1.86631800 1.08456300  
C -3.14667500 0.46931200 1.00119200  
H -3.87494800 1.27828000 0.89179200  
H -3.60477200 -0.28474000 1.65037400  
C -2.76788400 -0.15396700 -0.36844400  
C -3.65956200 -1.36016100 -0.68444800  
H -3.40329800 -1.79890300 -1.65542300  
H -3.55516700 -2.13920300 0.07874600  
C -2.95804500 0.88847000 -1.47578300  
H -2.64762000 0.50818700 -2.45499500  
H -4.01817700 1.14758800 -1.54900900  
H -2.41034700 1.81518000 -1.27482300  
H 1.54528700 -3.12483000 -1.56378800  
H 0.55578500 -2.61501100 -0.21148900  
C 3.09166200 -2.31801500 0.71362000  
H 4.00258600 -1.83022300 1.06817400  
H 2.40540000 -2.44247500 1.55774700  
C 3.35954100 -3.31355400 0.35410500  
C 0.28099000 3.13854200 -0.37612200  
H 0.05409400 3.22630300 0.69054800  
H 0.67364200 4.10405500 -0.70585700  
C -0.64912600 2.95877000 -0.92074700  
C -0.99290100 -1.34158700 2.27261400  
H -0.36164800 -2.19403000 1.99505300  
H -0.70867000 -1.01625600 3.27872500  
H -2.02425600 -1.70081600 2.31622800  
H 1.26177300 -0.48599600 1.68970800  
H -4.71260900 -1.06356700 -0.71861700

**TS\_18a-18b**

Sum of electronic and thermal Free  
Energies = -781.193397

-----  
C -0.11397000 -0.27935500 -1.07464100  
C 2.22532100 0.03065500 -0.16062700  
C 0.84110900 0.49025100 -0.05664900  
C 0.37254100 -0.03398700 1.36389300  
C -1.10485000 -0.47406800 1.23799100  
C -1.37734700 -0.69478500 -0.27647300  
H -0.35822000 0.43660000 -1.86225400  
H 0.53253100 0.73917600 2.11928600  
H -1.53390800 -1.76749300 -0.44905800

C 0.92714500 2.04738200 -0.26186800  
H 0.15874200 2.35369300 -0.97515800  
C 3.17447100 1.15558000 -0.17522600  
H 4.14919800 0.91436000 -0.60433600  
H 3.33474900 1.45323300 0.87615000  
C 2.32951800 2.23600600 -0.88523300  
H 2.31618900 2.03514400 -1.968198500  
H 2.73440700 3.23862800 -0.73548800  
C 2.62315100 -1.37034500 -0.36019100  
H 3.31110100 -1.30097600 -1.22321500  
C 1.44492500 -2.26119200 -0.75076200  
C 0.57168300 -1.48644900 -1.73907600  
H 1.20440000 -1.15003300 -2.57238200  
H -0.19708200 -2.13083000 -2.17350400  
C -2.13676300 0.59296400 1.65876900  
H -2.34779100 0.56173700 2.73225500  
H -1.77985000 1.60090000 1.42395700  
C -3.34420200 0.26878700 0.77946700  
H -4.09666200 1.06290200 0.75972100  
H -3.84110000 -0.64070300 1.13716200  
C -2.73375600 0.02518700 -0.61945200  
C -3.62187600 -0.87241300 -1.48403300  
H -3.16038000 -1.06352800 -2.46000400  
H -3.79991700 -1.83688300 -0.99696700  
C -2.57532000 1.37941600 -1.32559400  
H -2.16071700 1.27959100 -2.33369000  
H -3.56018700 1.84337200 -1.43254600  
H -1.94833100 2.07683200 -0.75970700  
H 1.83265000 -3.18273200 -1.19350600  
H 0.86567700 -2.55426300 0.13304400  
C 3.48834300 -1.89597200 0.81458900  
H 4.34423000 -1.24766900 1.01506500  
H 2.89044200 -1.98964700 1.72376900  
H 3.86052000 -2.88563300 0.54408800  
C 0.79167100 2.91735400 0.99000100  
H 1.57649100 2.71666300 1.72810300  
H 0.87448200 3.96840200 0.70254900  
H -0.17062800 2.79072600 1.48807400  
C -1.32485400 -1.74414200 2.07058000  
H -0.70919000 -2.57451000 1.70749500  
H -1.07285500 -1.56646800 3.12133300  
H -2.36853100 -2.06741700 2.02847200  
H 0.97136900 -0.89725000 1.67550300  
H -4.59347400 -0.40111300 -1.66323000

**IM18b**

Sum of electronic and thermal Free  
Energies = -781.197656

-----  
C -0.92315778 0.67030304 2.51548034  
C -2.49779029 0.43493203 4.25953602  
C -2.43055427 0.01862986 2.87959773  
C -2.24169925 -1.46902243 2.54045422  
C -1.29438408 -1.55211266 1.33826316  
C -0.33056595 -0.34933610 1.49537074  
H -1.14703070 1.63569161 2.06359046  
H -3.20681873 -1.95251171 2.36180263  
H 0.60519600 -0.70692454 1.94365832  
C -3.55401247 0.80860431 2.14539049  
H -3.22123432 1.09844845 1.14580945  
C -3.43533457 1.55757919 4.44314961  
H -3.09649243 2.29739884 5.17367755  
H -4.33023935 1.07760901 4.88811230  
C -3.73403398 2.06154602 3.02462018  
H -3.00884892 2.83767375 2.76047236  
H -4.73006063 2.49769397 2.93467151  
C -1.61544064 -0.05027105 5.34641451  
H -1.58409202 0.74146854 6.10422329  
C -0.19047633 -0.22437806 4.76906534  
C 0.01013719 0.87500732 3.72262273  
H -0.17357293 1.84961768 4.19498878  
H 1.04084756 0.89449710 3.35728889  
C -1.94604181 -1.32286549 -0.03896427  
H -2.39062107 -2.23895105 -0.44121336  
H -2.74477193 -0.57529930 0.02150899

|   |             |             |             |
|---|-------------|-------------|-------------|
| C | -0.79364076 | -0.78354006 | -0.88703591 |
| H | -1.13433530 | -0.27800752 | -1.79540296 |
| H | -0.14568814 | -1.60622205 | -1.20766961 |
| C | -0.00830367 | 0.18140726  | 0.04370723  |
| C | 1.49937412  | 0.09191557  | -0.21836447 |
| H | 2.05641739  | 0.78303817  | 0.42447951  |
| H | 1.87180654  | -0.92131370 | -0.03317940 |
| C | -0.46039394 | 1.62249354  | -0.22380050 |
| H | 0.03821688  | 2.34237288  | 0.43473129  |
| H | -0.20243475 | 1.89271844  | -1.25165540 |
| H | -1.54467863 | 1.74842089  | -0.12025183 |
| H | 0.52995158  | -0.14626545 | 5.58725192  |
| H | -0.06390732 | -1.21608758 | 4.32115198  |
| C | -2.18362217 | -1.31163042 | 6.04275111  |
| H | -3.16038526 | -1.11201284 | 6.48916570  |
| H | -2.27428263 | -2.15719637 | 5.36033973  |
| H | -1.49481658 | -1.58707914 | 6.84431557  |
| C | -4.85516482 | 0.01214931  | 2.02028258  |
| H | -5.19240768 | -0.37830514 | 2.98826359  |
| H | -5.64599532 | 0.65391908  | 1.62481330  |
| H | -4.75070367 | -0.83526390 | 1.33871286  |
| C | -0.55644485 | -2.89579487 | 1.35056887  |
| H | 0.01752055  | -3.01933122 | 2.27583240  |
| H | -1.26713613 | -3.72539848 | 1.27753773  |
| H | 0.14230954  | -2.98210613 | 0.51426394  |
| H | -1.78228264 | -1.98978754 | 3.38268243  |
| H | 1.72469424  | 0.34668340  | -1.25885808 |

#### TS\_18b-14b

Sum of electronic and thermal Free  
Energies = -781.190082

|   |             |             |             |
|---|-------------|-------------|-------------|
| C | -0.80559996 | 0.65673622  | 2.68196660  |
| C | -2.24474782 | 0.46336522  | 3.94590665  |
| C | -2.73418664 | -0.19146835 | 2.81460927  |
| C | -2.44200410 | -1.58993830 | 2.40562683  |
| C | -1.30512640 | -1.59283990 | 1.35429897  |
| C | -0.37376530 | -0.35782570 | 1.59735143  |
| H | -1.04741438 | 1.63407824  | 2.27674709  |
| H | -3.33917478 | -2.05432023 | 1.98410856  |
| H | 0.58084917  | -0.75997124 | 1.95543979  |
| C | -3.75798762 | 0.67016264  | 2.10779104  |
| H | -3.65943682 | 0.63415429  | 1.02007010  |
| C | -2.88846665 | 1.83304051  | 4.05411289  |
| H | -2.16878711 | 2.60407477  | 4.34777214  |
| H | -3.62696316 | 1.77125482  | 4.86472185  |
| C | -3.54827486 | 2.08156005  | 2.68857096  |
| H | -2.89337497 | 2.67231654  | 2.04175253  |
| H | -4.49032909 | 2.62690048  | 2.77255224  |
| C | -1.57289502 | -0.12450668 | 5.18367543  |
| H | -1.54414625 | 0.70531797  | 5.90122147  |
| C | -0.11997376 | -0.41975264 | 4.79175040  |
| C | 0.20976566  | 0.72055465  | 3.83386729  |
| H | 0.13448119  | 1.67727041  | 4.36120718  |
| H | 1.21400391  | 0.65856429  | 3.40305516  |
| C | -1.77716652 | -1.43854866 | -0.10469890 |
| H | -2.07240242 | -2.39993582 | -0.53609913 |
| H | -2.64450352 | -0.77226007 | -0.17507304 |
| C | -0.57180772 | -0.80458394 | -0.79564216 |
| H | -0.80608510 | -0.39345112 | -1.78152433 |
| H | 0.21679844  | -1.55152541 | -0.94051194 |
| C | -0.09187236 | 0.29134355  | 0.18322470  |
| C | 1.40093940  | 0.58775574  | 0.01796010  |
| H | 1.73910956  | 1.34503216  | 0.73506055  |
| H | 2.00179657  | -0.31559623 | 0.16550286  |
| C | -0.87711769 | 1.58199146  | -0.09632492 |
| H | -0.52188745 | 2.42684557  | 0.50299649  |
| H | -0.73657278 | 1.86192316  | -1.14388810 |
| H | -1.95405540 | 1.46969583  | 0.06811947  |
| H | 0.54069998  | -0.45381642 | 5.66105300  |
| H | -0.04548361 | -1.38795958 | 4.27857986  |
| C | -2.33825990 | -1.27000949 | 5.85055095  |
| H | -3.38105201 | -0.99664841 | 6.03666117  |
| H | -2.32375986 | -2.18891772 | 5.26147090  |
| H | -1.87850268 | -1.49375568 | 6.81625152  |

|   |             |             |             |
|---|-------------|-------------|-------------|
| C | -5.14151889 | 0.09923579  | 2.48995773  |
| H | -5.28197497 | 0.09465594  | 3.57624415  |
| H | -5.91551796 | 0.73272082  | 2.05110730  |
| H | -5.28727828 | -0.91728888 | 2.11875372  |
| C | -0.52522725 | -2.90627074 | 1.49729656  |
| H | -0.06955694 | -2.99092249 | 2.48972028  |
| H | -1.19075510 | -3.76332544 | 1.35392364  |
| H | 0.27585491  | -2.97583154 | 0.75630451  |
| H | -2.13084782 | -2.17837730 | 3.27038901  |
| H | 1.60882233  | 0.96921810  | -0.98663100 |

#### TM14b

Sum of electronic and thermal Free  
Energies = -781.19441

|   |             |             |             |
|---|-------------|-------------|-------------|
| C | -0.57727078 | 0.63296855  | 2.80801795  |
| C | -2.00554255 | 0.52191049  | 3.64066128  |
| C | -2.82803090 | -0.23549820 | 2.71893580  |
| C | -2.52402405 | -1.60220161 | 2.33663608  |
| C | -1.25744572 | -1.56757979 | 1.37681930  |
| C | -0.30879892 | -0.34004241 | 1.62437603  |
| H | -0.55107177 | 1.65726428  | 2.43172260  |
| H | -3.34843177 | -2.09082190 | 1.81060819  |
| H | 0.66938231  | -0.78493804 | 1.84162767  |
| C | -3.92609134 | 0.57441670  | 2.15889192  |
| H | -4.09647604 | 0.37219856  | 1.09528190  |
| C | -2.71249291 | 1.88442725  | 3.78161327  |
| H | -1.99724997 | 2.70067771  | 3.91611504  |
| H | -3.34145552 | 1.85911132  | 4.67982754  |
| C | -3.57406274 | 2.02901645  | 2.51875261  |
| H | -3.00425926 | 2.49102282  | 1.70996520  |
| H | -4.46799808 | 2.63477818  | 2.68205218  |
| C | -1.59679839 | -0.10402985 | 5.02108030  |
| H | -1.51741275 | 0.77802008  | 5.67096260  |
| C | -0.17594253 | -0.63019808 | 4.83839408  |
| C | 0.43826410  | 0.44728880  | 3.95349652  |
| H | 0.52914546  | 1.37715465  | 4.52642197  |
| H | 1.42801840  | 0.20486021  | 3.55826860  |
| C | -1.66212732 | -1.47152093 | -0.10898243 |
| H | -1.87318634 | -2.45967826 | -0.52875708 |
| H | -2.56569248 | -0.86482095 | -0.24050250 |
| C | -0.46457149 | -0.77278103 | -0.75215036 |
| H | -0.67083896 | -0.40507236 | -1.76121189 |
| H | 0.38310324  | -1.46485529 | -0.82572853 |
| C | -0.13300320 | 0.36598742  | 0.23077454  |
| C | 1.29702642  | 0.88306604  | 0.06800762  |
| H | 1.53179742  | 1.64536485  | 0.82064476  |
| H | 2.02464876  | 0.07117604  | 0.16850651  |
| C | -1.10501798 | 1.52729796  | -0.02348968 |
| H | -0.89202237 | 2.39996202  | 0.60111789  |
| H | -1.00571262 | 1.85460530  | -1.06268446 |
| H | -2.15100497 | 1.24243959  | 0.12603300  |
| H | 0.33936751  | -0.76087890 | 5.79349109  |
| H | -0.17619863 | -1.60245930 | 4.32741916  |
| C | -2.60440711 | -1.04216885 | 5.67978821  |
| H | -3.59439418 | -0.58014424 | 5.75475767  |
| H | -2.71011103 | -1.99907670 | 5.16264847  |
| H | -2.27601880 | -1.26535480 | 6.69804162  |
| C | -5.18839330 | 0.07467638  | 2.93697014  |
| H | -5.09080731 | 0.24767677  | 4.01157598  |
| H | -6.03820005 | 0.65536647  | 2.57223773  |
| H | -5.38579915 | -0.98467056 | 2.76239419  |
| C | -0.51804177 | -2.89388558 | 1.60454009  |
| H | -0.09000248 | -2.95165149 | 2.60978009  |
| H | -1.19388815 | -3.74344532 | 1.46589835  |
| H | 0.30110867  | -2.99461410 | 0.88653938  |
| H | -2.23695718 | -2.18321354 | 3.21615181  |
| H | 1.43472093  | 1.34029282  | -0.91675193 |



### 3. 3D Representation of All Computed Structures

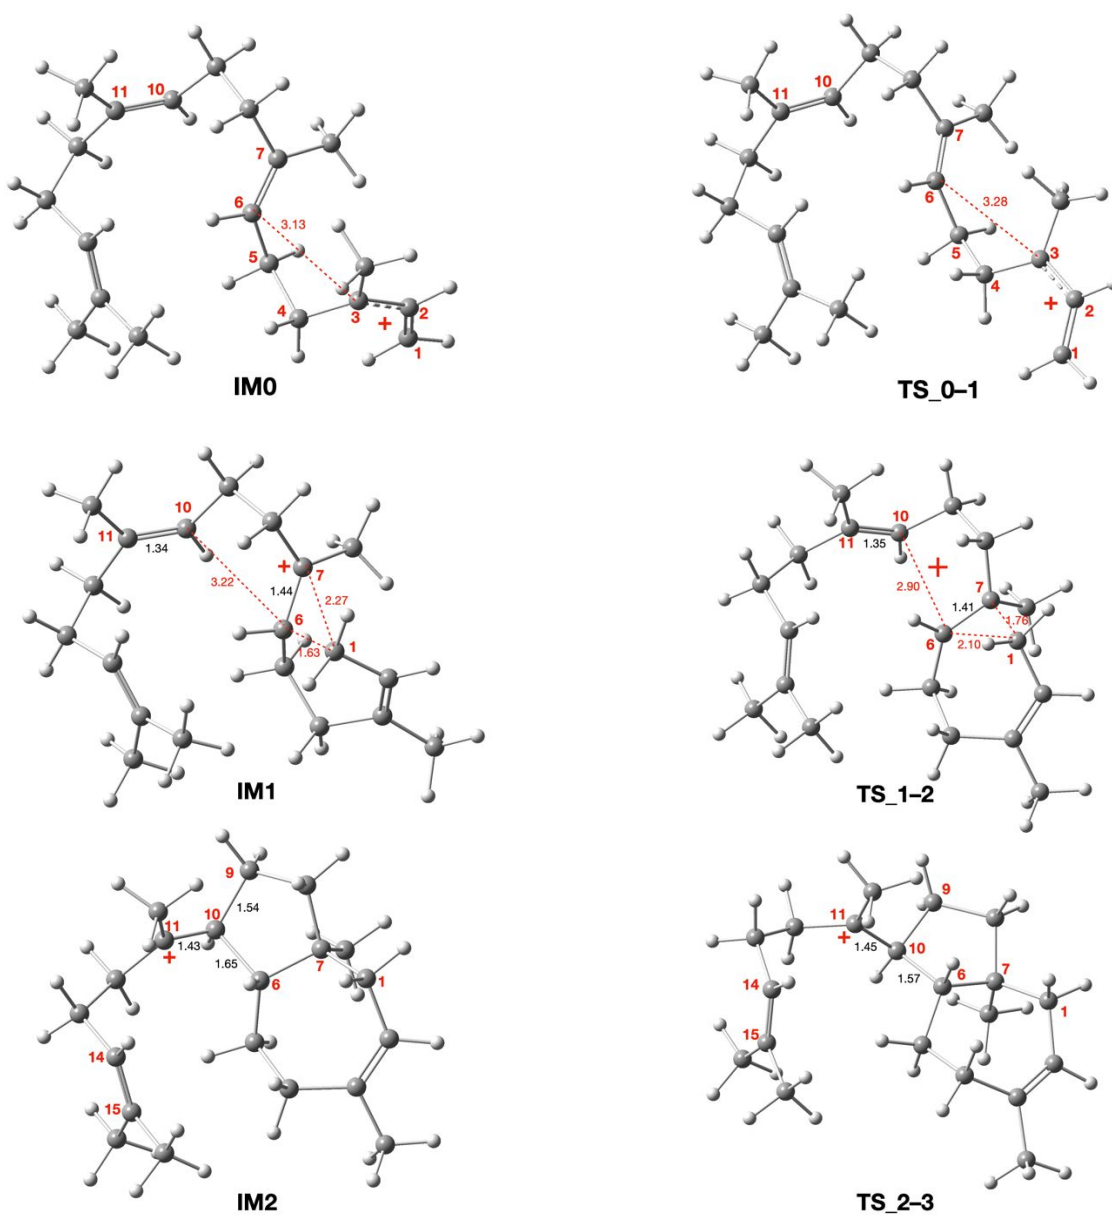

Figure S1. 3D representation of IM0, TS\_0-1, IM1, TS\_1-2, IM2 and TS\_2-3. Atomic distances are shown in Å.



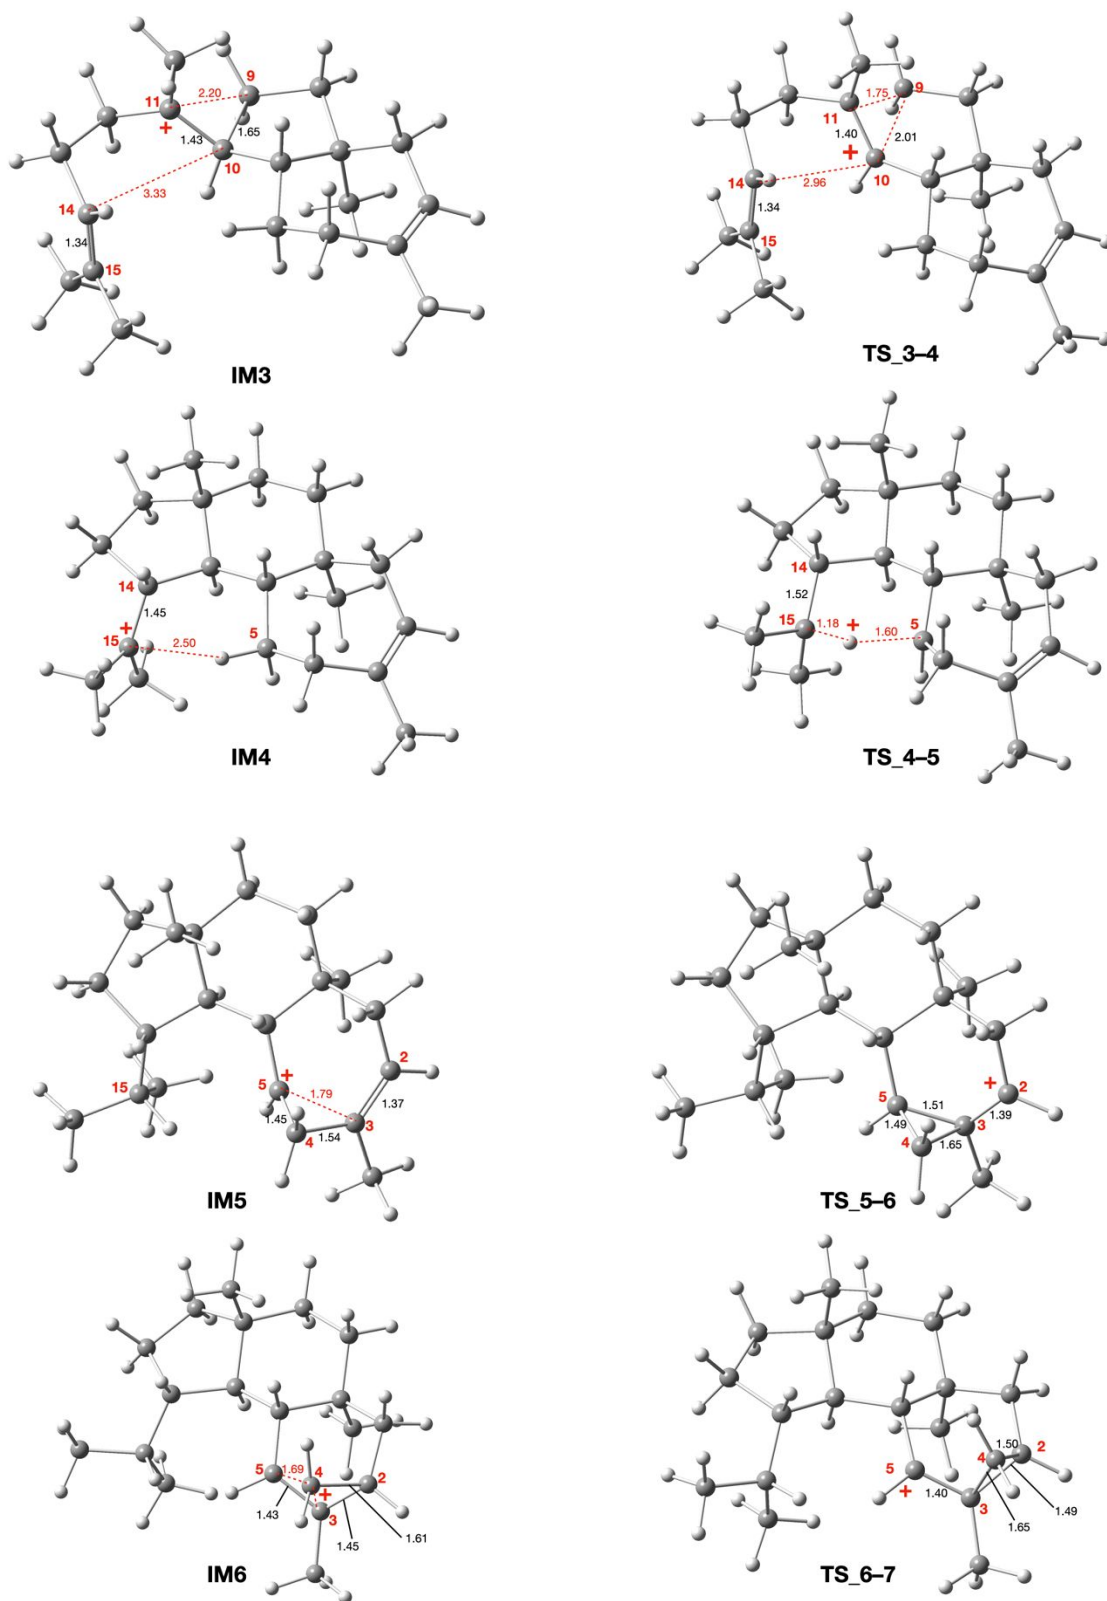

Figure S2. 3D representation of IM3, TS<sub>3-4</sub>, IM4, TS<sub>4-5</sub>, IM5, TS<sub>5-6</sub>, IM6 and TS<sub>6-7</sub>. Atomic distances are shown in Å.

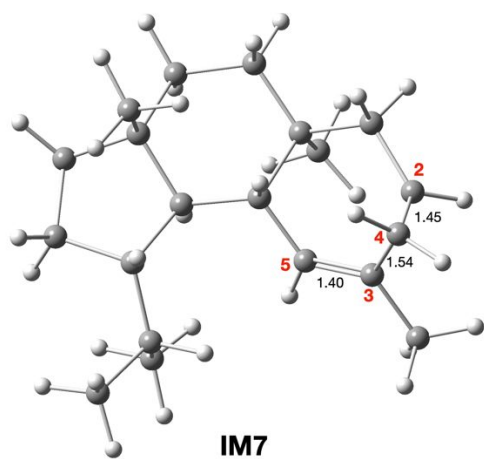

Figure S3. 3D representation of IM7. Atomic distances are shown in Å.

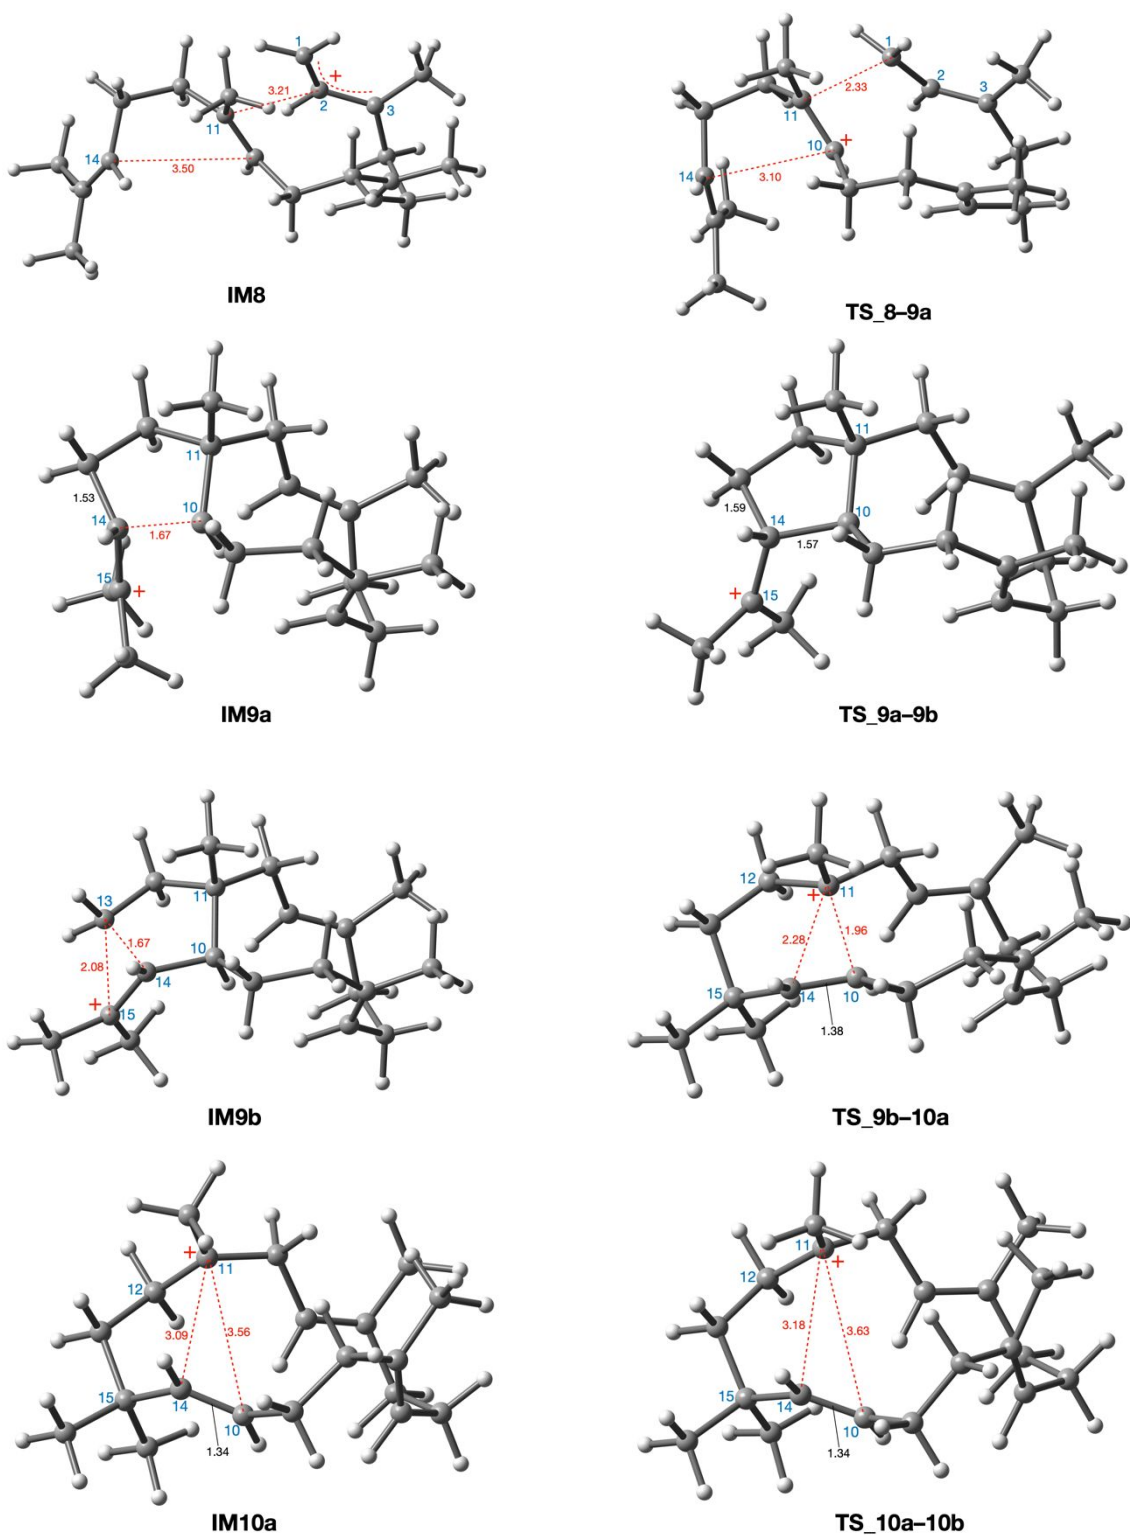

Figure S4. 3D representation of IM8, TS\_8-9a, IM9a, TS\_9a-9b, IM9b, TS\_9b-10a, IM10a and TS\_10a-10b. Atomic distances are shown in Å.

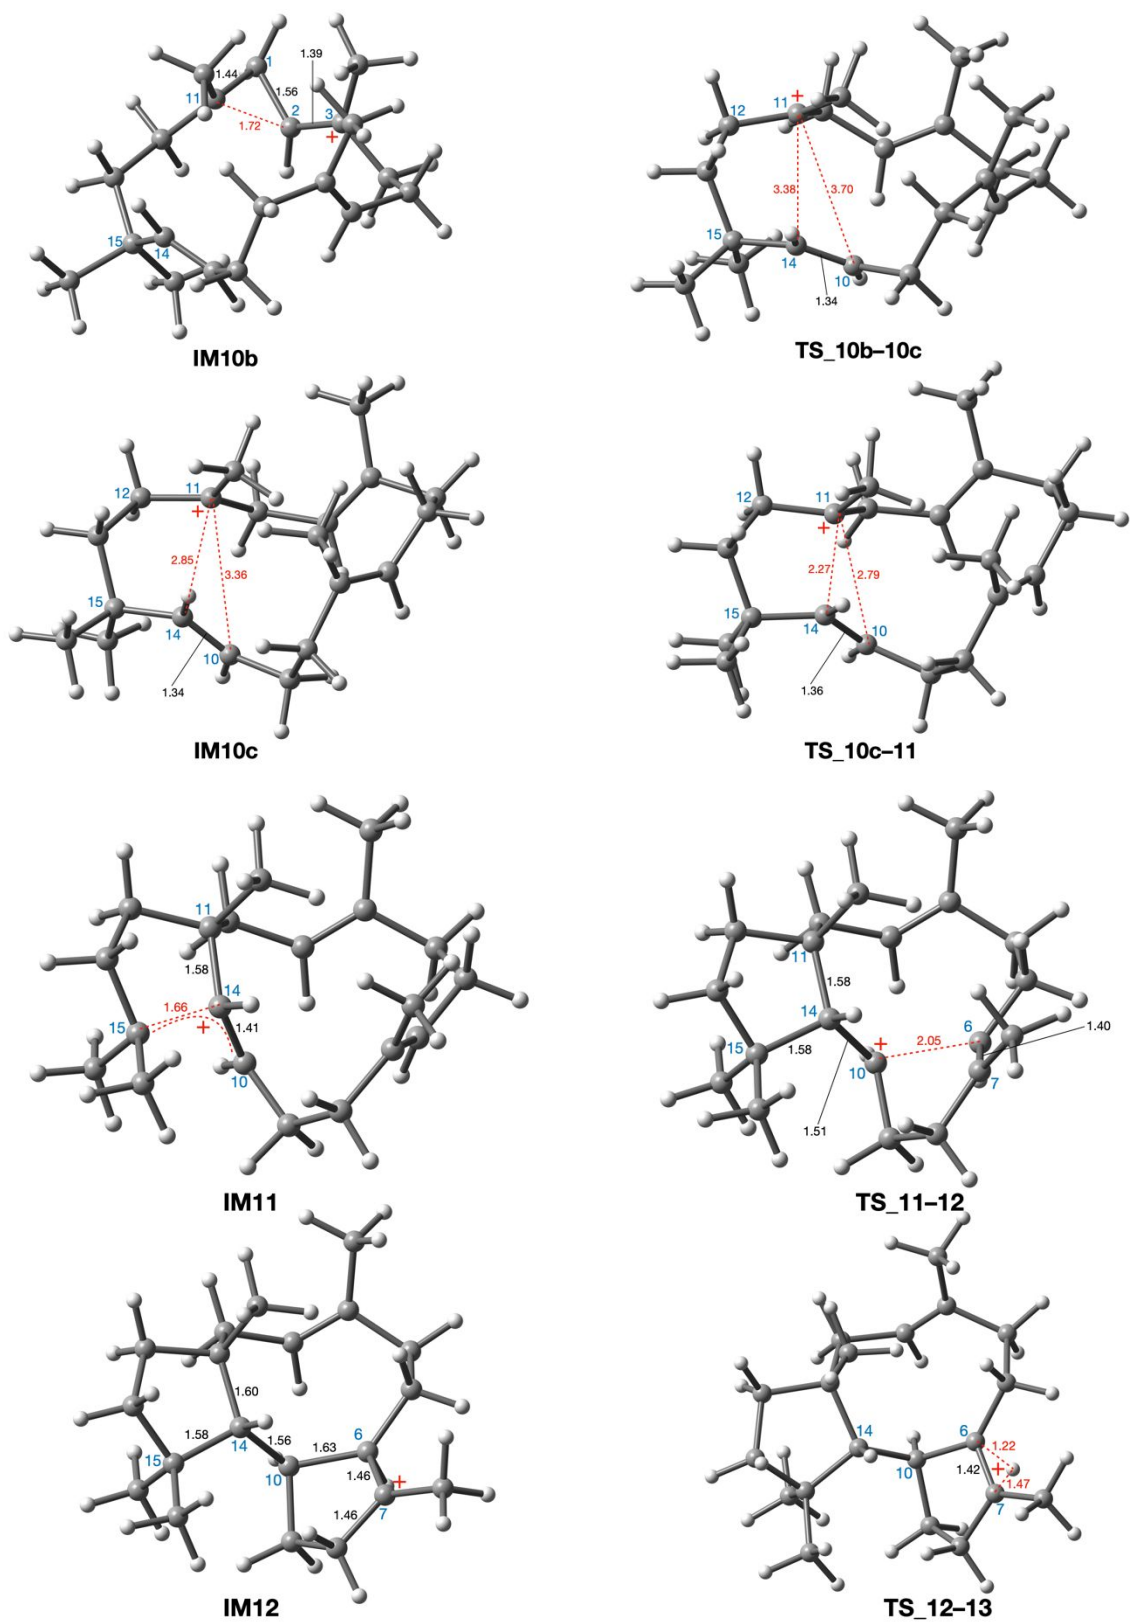

Figure S5. 3D representation of IM10b, TS\_10b-10c, IM10c, TS\_10c-

11, IM11, TS\_11-12, IM12 and TS\_12-13. Atomic distances are shown in Å.

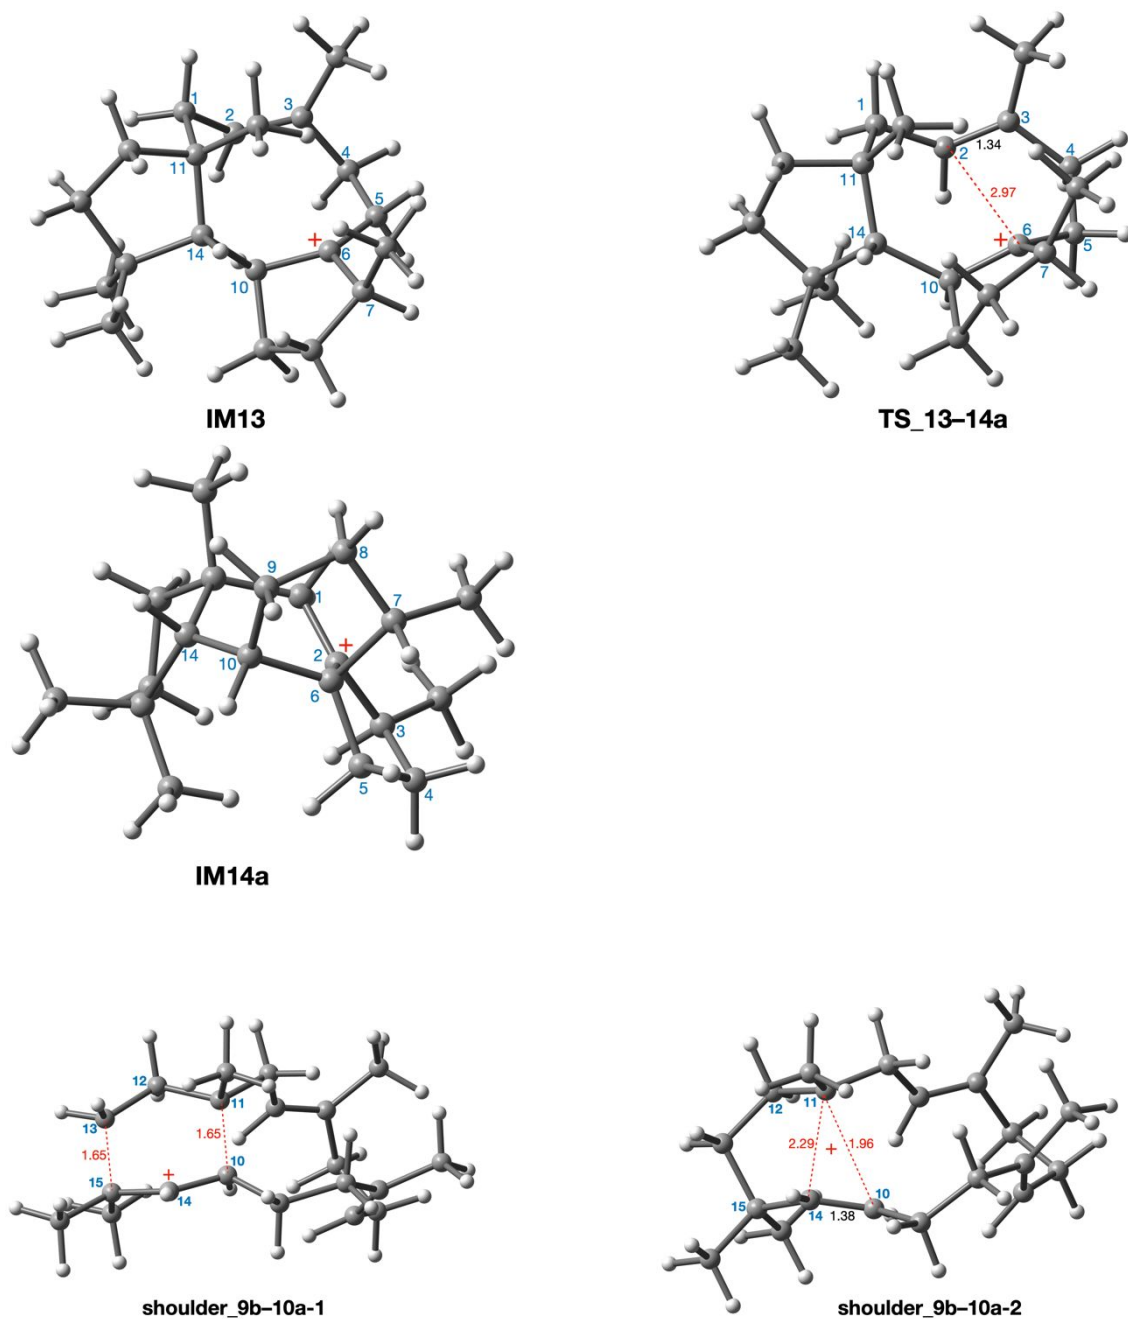

Figure S6. 3D representation of IM13, TS\_13-14a, IM14a, shoulder\_9b-10a-1 and shoulder\_9b-10a-2. Atomic distances are shown in Å.

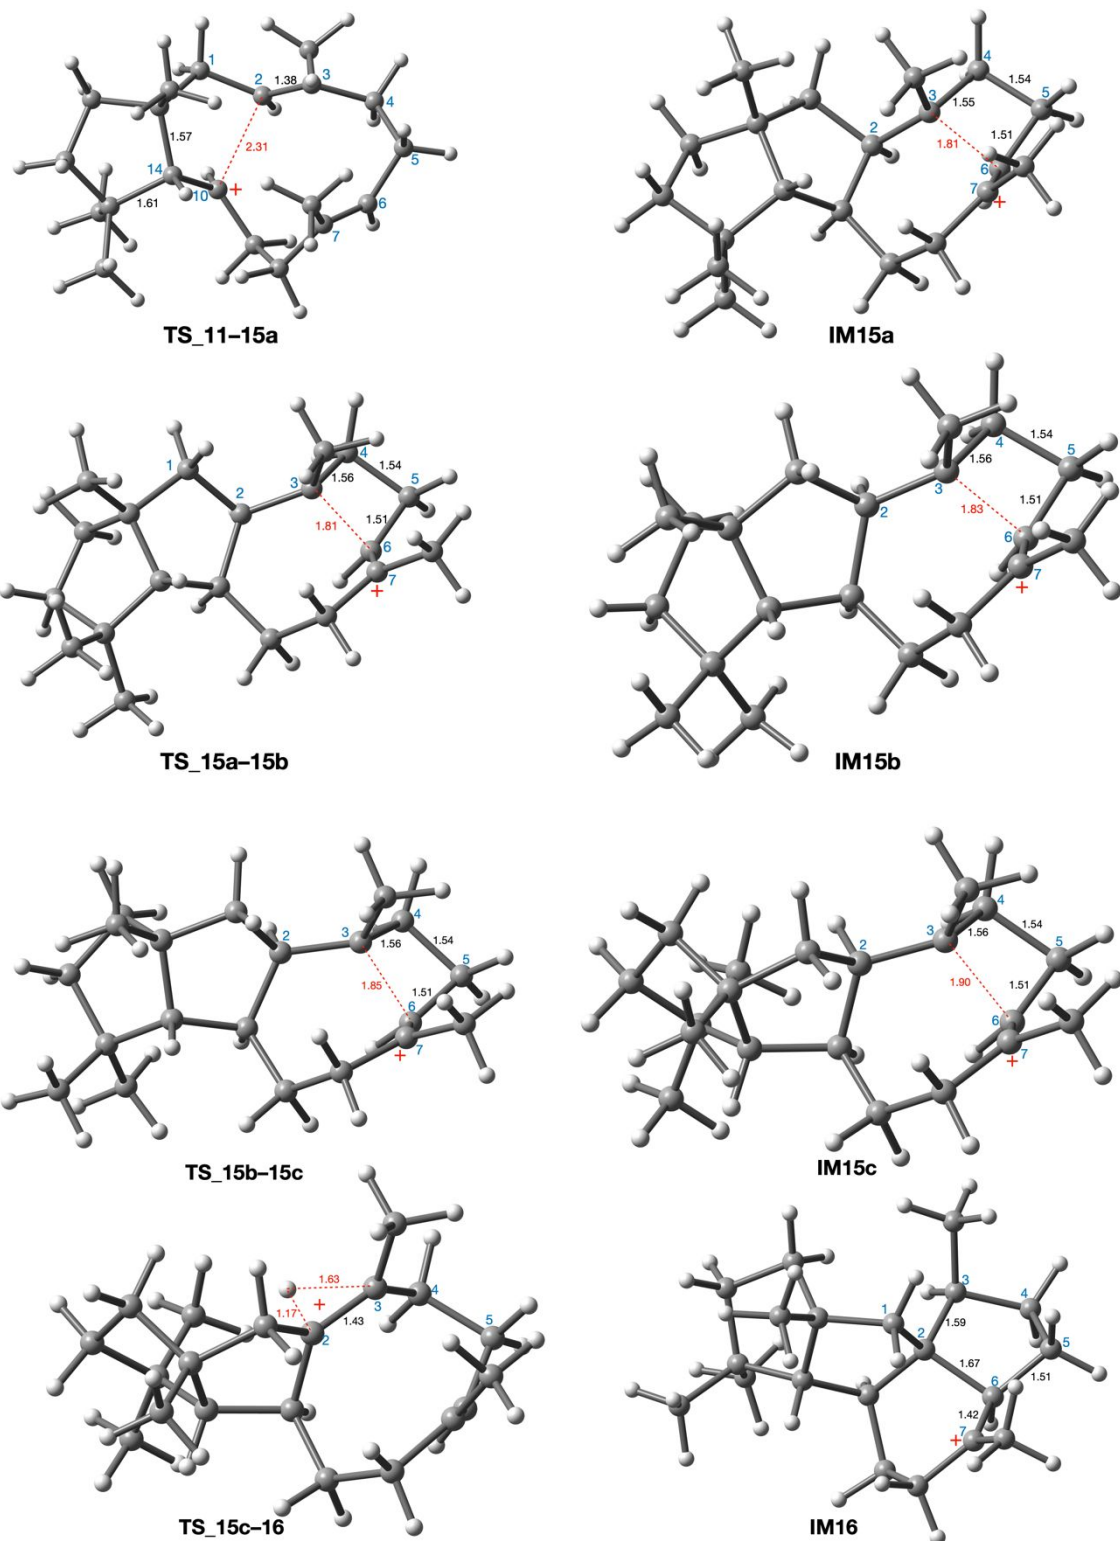

Figure S7. 3D representation of TS\_11-15a, IM15a, TS\_15a-15b,



IM15b, TS\_15b-15c, IM15c, TS\_15c-16, and IM16. Atomic distances are shown in Å.

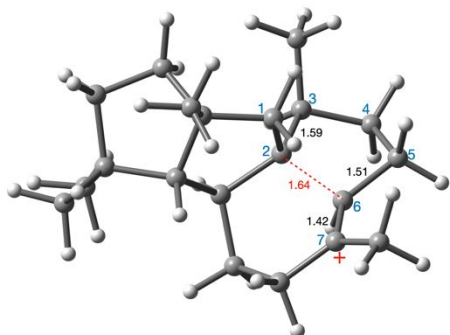

TS\_16-17

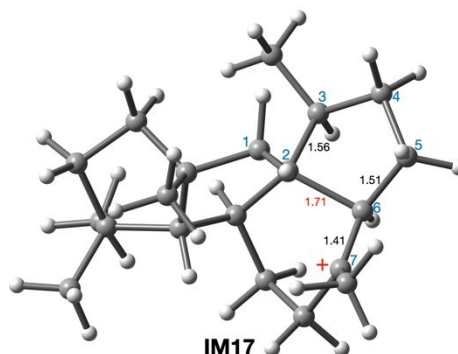

IM17

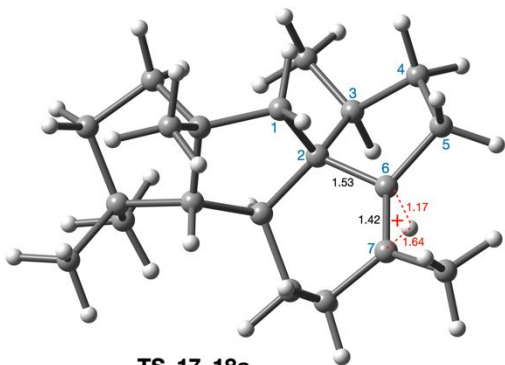

TS\_17-18a

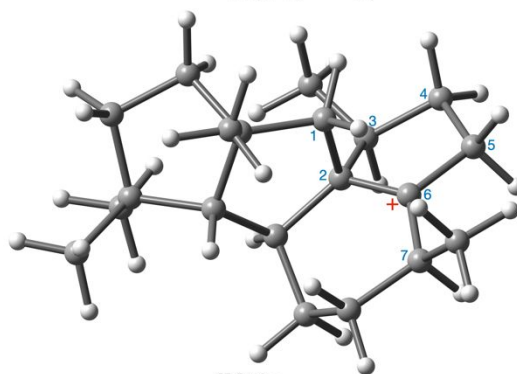

IM18a

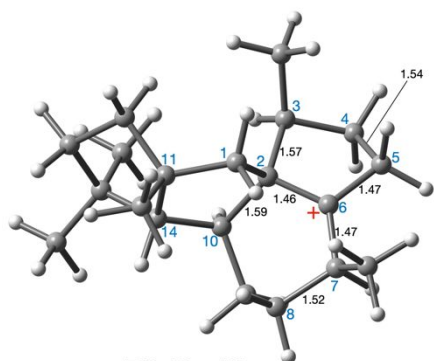

TS\_18a-18b

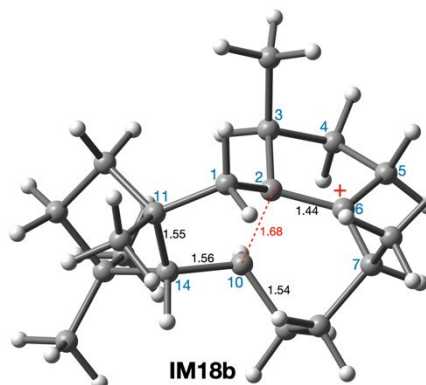

IM18b

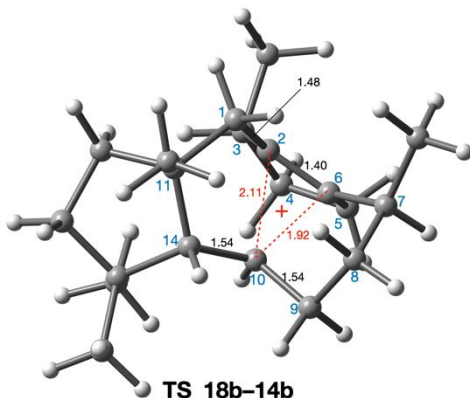

TS\_18b-14b

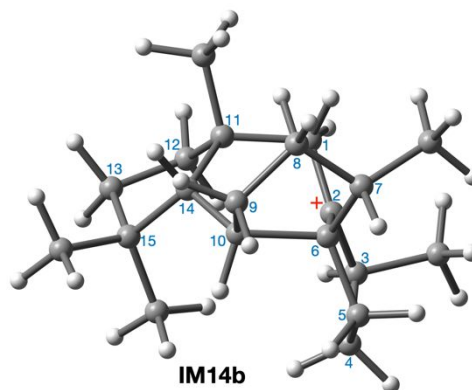

IM14b

**Figure S8. 3D representation of TS<sub>16-17</sub>, IM17, TS<sub>17-18a</sub>, TS<sub>18a-18b</sub>, IM18b, TS<sub>18b-14b</sub>, and IM14b. Atomic distances are shown in Å.**

#### **4. References**

- (1) Maeda S.; Osada Y.; Morokuma K.; Ohno K. GRRM 11, Version 11.03, **2012**.
- (2) Maeda, S.; Ohno, K.; Morokuma, K. Systematic exploration of the mechanism of chemical reactions: the global reaction route mapping (GRRM) strategy using the ADDF and AFIR methods. *Phys. Chem. Chem. Phys.* **2013**, *15*, 3683-3701.
- (3) Ohno, K.; Maeda, S. A scaled hypersphere search method for the topography of reaction pathways on the potential energy surface. *Chem. Phys. Lett.* **2004**, *384*, 277-282.
- (4) Maeda, S.; Ohno, K. Global Mapping of Equilibrium and Transition Structures on Potential Energy Surfaces by the Scaled Hypersphere Search Method: Applications to ab Initio Surfaces of Formaldehyde and Propyne Molecules. *J. Phys. Chem. A* **2005**, *109*, 5742-5753.
- (5) Ohno, K.; Maeda, S. Global Reaction Route Mapping on Potential Energy Surfaces of Formaldehyde, Formic Acid, and Their Metal-Substituted Analogues. *J. Phys. Chem. A* **2006**, *110*, 8933-8941.
- (6) Gaussian16, Revision C.01, Frisch, M. J.; Trucks, G. W.; Schlegel, H. B.; Scuseria, G. E.; Robb, M. A.; Cheeseman, J. R.; Scalmani, G.; Barone, V.; Petersson, G. A.; Nakatsuji, H.; Li, X.; Caricato, M.; Marenich, A. V.; Bloino, J.; Janesko, B. G.; Gomperts, R.; Mennucci, B.; Hratchian, H. P.; Ortiz, J. V.; Izmaylov, A. F.; Sonnenberg, J. L.; Williams-Young, D.; Ding, F.; Lipparini, F.; Egidi, F.; Goings, J.; Peng, B.; Petrone, A.; Henderson, T.; Ranasinghe, D.; Zakrzewski, V. G.; Gao, J.; Rega, N.; Zheng, G.; Liang, W.; Hada, M.; Ehara, M.; Toyota, K.; Fukuda, R.; Hasegawa, J.; Ishida, M.; Nakajima, T.; Honda, Y.; Kitao, O.; Nakai, H.; Vreven, T.; Throssell, K.; Montgomery, J. A., Jr.; Peralta, J. E.; Ogliaro, F.; Bearpark, M. J.; Heyd, J. J.; Brothers, E. N.; Kudin, K. N.; Staroverov, V. N.; Keith, T. A.; Kobayashi, R.; Normand, J.; Raghavachari, K.; Rendell, A. P.; Burant, J. C.;



Iyengar, S. S.; Tomasi, J.; Cossi, M.; Millam, J. M.; Klene, M.; Adamo, C.; Cammi, R.; Ochterski, J. W.; Martin, R. L.; Morokuma, K.; Farkas, O.; Foresman, J. B.; Fox, D. J. Gaussian, Inc., Wallingford CT, 2016.

(7) Zhao, Y.; Truhlar, D. G. The M06 suite of density functionals for main group thermochemistry, thermochemical kinetics, noncovalent interactions, excited states, and transition elements: two new functionals and systematic testing of four M06-class functionals and 12 other functionals. *Theor. Chem. Acc.* **2008**, *120*, 215-241.

(8) Fukui, K. The path of chemical reactions - the IRC approach. *Acc. Chem. Res.* **2002**, *14*, 363-368.

(9) Page, M.; Doubleday, C.; McIver, J. W., Jr. Following steepest descent reaction paths. The use of higher energy derivatives with ab initio electronic structure methods. *J. Chem. Phys.* **1990**, *93*, 5634-5642.

(10) Ishida, K.; Morokuma, K.; Komornicki, A. The intrinsic reaction coordinate. An ab initio calculation for  $\text{HNC} \rightarrow \text{HCN}$  and  $\text{H}^- + \text{CH}_4 \rightarrow \text{CH}_4 + \text{H}^-$ . *J. Chem. Phys.* **1977**, *66*, 2153-2156.

(11) Gonzalez, C.; Schlegel, H. B. Reaction path following in mass-weighted internal coordinates. *J. Phys. Chem.* **1990**, *94*, 5523-5527.

(12) Adamo, C.; Barone, V. Exchange functionals with improved long-range behavior and adiabatic connection methods without adjustable parameters: The mPW and mPW1PW models. *J. Chem. Phys.* **1998**, *108*, 664-675.

(13) Matsuda, S. P. T.; Wilson, W. K.; Xiong, Q. Mechanistic insights into triterpene synthesis from quantum mechanical calculations. Detection of systematic errors in B3LYP cyclization energies. *Org. Biomol. Chem.* **2006**, *4*, 530-543.
